# A SCOPING REVIEW OF TRAUMA INFORMED APPROACHES IN ACUTE, CRISIS, EMERGENCY AND RESIDENTIAL MENTAL HEALTH CARE.

Katherine R. K. Saunders<sup>1</sup>, Elizabeth McGuinness<sup>1</sup>, Phoebe Barnett<sup>2,3,4</sup>, Una Foye<sup>1</sup>, Jessica Sears<sup>5</sup>, Sophie Carlisle<sup>6</sup>, Felicity Allman<sup>2</sup>, Vasiliki Tzouvara<sup>7</sup>, Merle Schlieff<sup>2</sup>, Norha Vera San Juan<sup>1</sup>, Ruth Stuart<sup>1</sup>, Jessica Griffiths<sup>1</sup>, Rebecca Appleton<sup>2</sup>, Paul McCrone<sup>8,9</sup>, Rachel Rowan Olive<sup>10</sup>, Patrick Nyikavaranda<sup>10</sup>, Tamar Jeynes<sup>10</sup>, Lizzie Mitchell<sup>10</sup>, Alan Simpson<sup>1</sup>, Sonia Johnson<sup>2</sup>, Kylee Trevillion<sup>1</sup>

1. NIHR Mental Health Policy Research Unit, Institute of Psychiatry, Psychology and Neuroscience, King's College London, London, UK
2. NIHR Mental Health Policy Research Unit, Division of Psychiatry, University College London, UK
3. Centre for Outcomes Research and Effectiveness, Research Department of Clinical, Educational, & Health Psychology, University College London, London, UK
4. National Collaborating Centre for Mental Health, Royal College of Psychiatrists, London, UK
5. South London and Maudsley NHS Foundation Trust, London, UK.
6. Section of Women's Mental Health, King's College London, London, UK.
7. Care for Long Term Conditions Research Division, King's College London, London, UK.
8. Institute for Lifecourse Development, University of Greenwich, London, UK
9. School of Health Sciences, University of Greenwich, London, UK
10. NIHR Mental Health Policy Research Unit Lived Experience Working Group, Division of Psychiatry, University College London, UK

Corresponding author

Name: Katherine R. K. Saunders

Email: [katherine.saunders@kcl.ac.uk](mailto:katherine.saunders@kcl.ac.uk)

Number: N/A

Address: David Goldberg Building

De Crespigny Park

Institute of Psychiatry, Psychology and Neuroscience

SE5 8AF

**NOTE: This preprint reports new research that has not been certified by peer review and should not be used to guide clinical practice.**

## Abstract

Experiences of trauma in childhood and adulthood are highly prevalent among service users accessing acute, crisis, emergency, and residential mental health services. These settings, and restraint and seclusion practices used, can be extremely traumatic, leading to a growing awareness for the need for trauma informed care (TIC). The aim of TIC is to acknowledge the prevalence and impact of trauma and create a safe environment to prevent re-traumatisation. This scoping review maps the TIC approaches delivered in these settings and reports related service user and staff experiences and attitudes, staff wellbeing, and service use outcomes.

We searched seven databases (EMBASE; PsycINFO; MEDLINE; Web of Science; Social Policy and Practice; Maternity and Infant Care Database; Cochrane Library Trials Register) between 24/02/2022-10/03/2022, used backwards and forwards citation tracking, and consulted academic and lived experience experts, identifying 4244 potentially relevant studies. Thirty-one studies were included.

Most studies (n=23) were conducted in the USA and were based in acute mental health services (n=16). We identified few trials, limiting inferences that can be drawn from the findings. The Six Core Strategies (n=7) and the Sanctuary Model (n=6) were the most commonly reported approaches. Rates of restraint and seclusion reportedly decreased. Some service users reported feeling trusted and cared for, while staff reported feeling empathy for service users and having a greater understanding of trauma. Staff reported needing training to deliver TIC effectively.

TIC principles should be at the core of all mental health service delivery. Implementing TIC approaches may integrate best practice into mental health care, although significant time and financial resources are required to implement organisational change at scale. Most evidence is preliminary in nature, and confined to acute and residential services, with little evidence on community crisis or emergency services. Clinical and research developments should prioritise lived experience expertise in addressing these gaps.

## Introduction

The concept of providing ‘trauma informed care’ (TIC) in healthcare settings has developed in response to increasing recognition that potentially traumatic experiences throughout the life course are associated with subsequent psychological distress and a range of mental health problems (1-4). ‘Trauma’ is a broad term which has no universally agreed definition. The Substance Abuse and Mental Health Services Administration (SAMHSA) defined trauma as ‘an event, series of events, or set of

circumstances that is experienced by an individual as physically or emotionally harmful or life threatening and that has lasting adverse effects on the individual's functioning and mental, physical, social, emotional, or spiritual well-being' (5). Traumatic experiences can include physical, sexual and/or emotional abuse, neglect, exposure to violence or conflict, physical or mental illness (personal experience or that of a family member), and systemic or social traumas (6, 7).

Research has shown that individuals engaged with mental health services report high levels of childhood and adulthood trauma (2, 8-10). There is a high prevalence of trauma among service users in acute services, including among women (2, 11), those with psychosis (12, 13), and "personality disorder" diagnoses (14) (which is a particularly controversial diagnosis (15) as a result of the stigma associated with this diagnostic label and disparities in quality of care experienced (16-19)). Electronic health record evidence shows that service users with a history of abuse during childhood have more comorbidities and are more likely to have inpatient admissions versus service users without a similar history (20). Similarly, among people with long-term mental health conditions, rates of childhood trauma and adversity are high, with both experiences theorised as aetiological factors for mental health conditions (21-23). Staff in acute services are also affected by trauma experienced at work, which are highlighted as a source of stress and create a cycle of 'reciprocal traumatisation' (24, 25).

Inpatient, crisis, emergency and residential mental health care settings (typology of care categories derived from an exploration of the range, accessibility, and quality of acute psychiatric services (26)) are used by service users experiencing severe mental health episodes. Such settings include acute wards, community crisis teams, psychiatry liaison teams within emergency departments, and mental health crisis houses. Compulsory detention under mental health legislation, e.g., the Mental Health Act in the UK, which affects many service users in these settings, has the potential to traumatise or retraumatise (27). Routine staff procedures for managing the behaviour of distressed service users in inpatient settings, including seclusion and restraint, have also been shown to be destabilising and retraumatizing among people who have experienced trauma (6, 28) as well as constituting a traumatic experience in their own right (24, 29). The power imbalances in these settings can create abusive dynamics, as well as mirror previous abusive relationships and situations (6), engendering mistrust and creating a harmful, rather than healing and supportive, environment.

In principle, TIC centres an understanding of the prevalence and impact of trauma, recognises trauma, responds comprehensively to trauma and takes steps to avoid re-traumatisation (5). The aim of TIC in healthcare is to create a therapeutic environment where communication, empathy and collaboration are prioritised. The TIC literature in healthcare is varied and lacks an agreed definition. However, Sweeney and Taggart (2018), who both write from dual perspectives as researchers and trauma

survivors, developed an adapted definition of TIC (5, 30, 31) which we have used as a working definition throughout this scoping review. They define TIC as ‘a programme or organisational/system approach that: (1) understands and acknowledges the links between trauma and mental health, (2) adopts a broad definition of trauma which recognises social trauma and the intersectionality of multiple traumas, (3) undertakes sensitive enquiry into trauma experiences, (4) refers individuals to evidence-based trauma-specific support, (5) addresses vicarious trauma and re-traumatisation, (6) prioritises trustworthiness and transparency in communications, (7) seeks to establish collaborative relationships with service users, (8) adopts a strengths-based approach to care, (9) prioritises emotional and physical safety of service users, (10) works in partnership with trauma survivors to design, deliver and evaluate services.’ Although TIC provides a service structure which supports service users who have experienced trauma, there may be benefits for all service users in contact with mental health services. TIC principles are also helpful more broadly for avoiding traumatisation of service users.

TIC within inpatient, crisis, emergency, and residential mental health care settings is fairly newly established, and there is a lack of research mapping its use. The aim of this scoping review is to identify, map and explore the TIC models and approaches used in these settings, and to review impacts on and experiences of service users and staff. We also highlight gaps and variability in literature and service provision. TIC is a broad term, and it has been applied in numerous and varied ways in mental health care. In this review, we describe each application of TIC as a ‘trauma informed approach’.

This scoping review will answer the following primary research question:

1. What trauma informed approaches are used in acute, crisis, emergency, and residential mental health care?

Within each trauma informed approach identified, we will answer the following secondary research questions:

2. What is known about service user and carer expectations and experiences of TIC in acute, crisis, emergency, and residential mental health care?
3. How does TIC in acute, crisis, emergency, and residential mental health care impact on service user outcomes?
4. What is known about staff attitudes, expectations, and experiences of delivering TIC in acute, crisis, emergency, and residential mental health care?
5. How does TIC impact on staff practices and staff wellbeing acute, crisis, emergency, and residential mental health care?

6. How does TIC in acute, crisis, emergency and residential mental health care impact on service use and service costs, and what evidence exists about their cost-effectiveness?

## Methods

### Study design

This scoping review was conducted in accordance with the Preferred Reporting Items for Systematic Reviews and Meta-Analyses Extension for Scoping Reviews (PRISMA-ScR (32)), using a framework for conducting scoping reviews (33). The PRISMA-ScR checklist can be seen in Appendix 1. The protocol was registered with the Open Science Framework ahead of conducting the searches (<https://osf.io/2b5w7>). The review was steered by a team including academic experts, clinical researchers, and experts by experience and/or profession, with lived experience researchers contributing to the development of the research questions, the data extraction form, the interpretation, and the manuscript draft.

### Eligibility criteria

#### Population

Service users, or people who support or care for service users, of any age (both adults and children), gender or sexuality, or staff members (of any gender and sexuality) were included.

#### Setting

We included studies that focused (or provided disaggregated data) on care delivered within acute, crisis, emergency settings, or residential mental health settings; acute and crisis settings include inpatient, community-based crisis, hospital emergency department, acute day units and crisis houses. Forensic mental health and substance use acute, crisis and inpatient settings were also included. We excluded studies from general population prison settings, where there is debate as to whether TIC can be delivered in carceral settings (34), and residential settings where the primary purpose of the setting was not to provide mental health or psychiatric care (e.g., foster care or residential schools).

#### Intervention

Trauma informed care interventions. Programmes aiming to reduce restrictive practices in psychiatric settings were not included without explicit reference to TIC within the programme.

#### Outcomes

We included studies reporting any positive and adverse individual-, interpersonal-, service- and/or system-level outcomes, including outcomes from the implementation, use or testing of TIC. Individual-level outcomes are related to service user or staff experiences, attitudes, and expectations; interpersonal outcomes occur because of interactions between staff and service users; service-level outcomes include TIC procedures that occur on an individual service level; and system-level outcomes refer to broader organisational outcomes related to TIC implementation. We included studies exploring service user, staff and carer expectations and experiences of TIC approaches.

### **Types of studies**

We included qualitative, quantitative, or mixed-method research study designs. To map TIC provision, service descriptions, evaluations, audits, and case studies of individual service provision were also included. We excluded reviews, conference abstracts with no associated paper, protocols, editorials, policy briefings, books/book chapters, personal blogs/commentaries, and BSc and MSc theses. We included non-English studies that our team could translate (English, German, Spanish). Both peer-reviewed and grey literature sources were eligible.

### **Search strategy**

A three-step search strategy was used. Firstly, we searched seven databases between 24/02/2022 and 10/03/2022: EMBASE; PsycINFO; MEDLINE; Web of Science; Social Policy and Practice; Maternity and Infant Care Database (formerly MIDIRS); Cochrane Library Trials Register. An example full search strategy can be seen in Appendix 2. Searches were also run in one electronic grey literature database (Social Care Online); two pre-print servers (medRxiv and PsyArXiv), and two PhD thesis websites (ETHOS and DART). The search strategy used terms adapted from related reviews (35-44). We added specific health economic search terms. No date or language limits were applied to searches. Secondly, forward citation searching was conducted using Web of Science for all studies meeting inclusion criteria. Reference lists of all included studies were checked for relevant studies. Finally, international experts, networks on TIC in mental health care, and lived experience networks were contacted to identify additional studies.

### **Study selection**

All studies identified through database searches were independently title and abstract screened by KS, KT and NVSJ, with 20% double screened. All full texts of potentially relevant studies were double screened independently by KS and KT, with disagreements resolved through discussion. Screening was

conducted using Covidence (45). Studies identified through forwards and backwards citation searching and expert recommendation were screened by KS, EMG, and NVSJ.

## Charting and organising the data

A data extraction form based on the research questions and potential outcomes was developed using Microsoft excel and revised collaboratively with the working group. Information on the study design, research and analysis methods, population characteristics, mental health care setting, and TIC approach were extracted alongside data relating to our primary and secondary outcomes. The form was piloted on three included papers and relevant revisions made. Data extraction was completed by KS, EMG, VT, SC, and FA, with over 50% double extracted to check for accuracy by KS and EMG.

## Data synthesis process

Data relevant for each research question was synthesised narratively by KS, EMG, JS, UF, VT, FA, and MS. Question 1 was grouped by approach and reported by setting. Where data was available, evidence for questions 2-6 was synthesised within each TIC approach. We answered the a priori questions set out in our protocol, however we also answered two further questions, based on their relevance for informing policy and implementation strategy: “What are the reported difficulties in implementing trauma informed approaches and interventions?” and “What is required to implement TIC effectively?”

Both quantitative and qualitative data were narratively synthesised together for each question. Areas of heterogeneity were considered throughout this process and highlighted. The categorisation and synthesis of the trauma informed approaches were discussed and validated by KS, EMG, JS, and KT.

## Results

The database search returned 4146 studies from which 2759 potentially relevant full-text studies were identified. Additional search methods identified 96 studies. Overall, 31 studies met inclusion criteria and were included in this review. The PRISMA diagram can be seen in Figure 1.

Characteristics of all included studies are shown in Table 1.

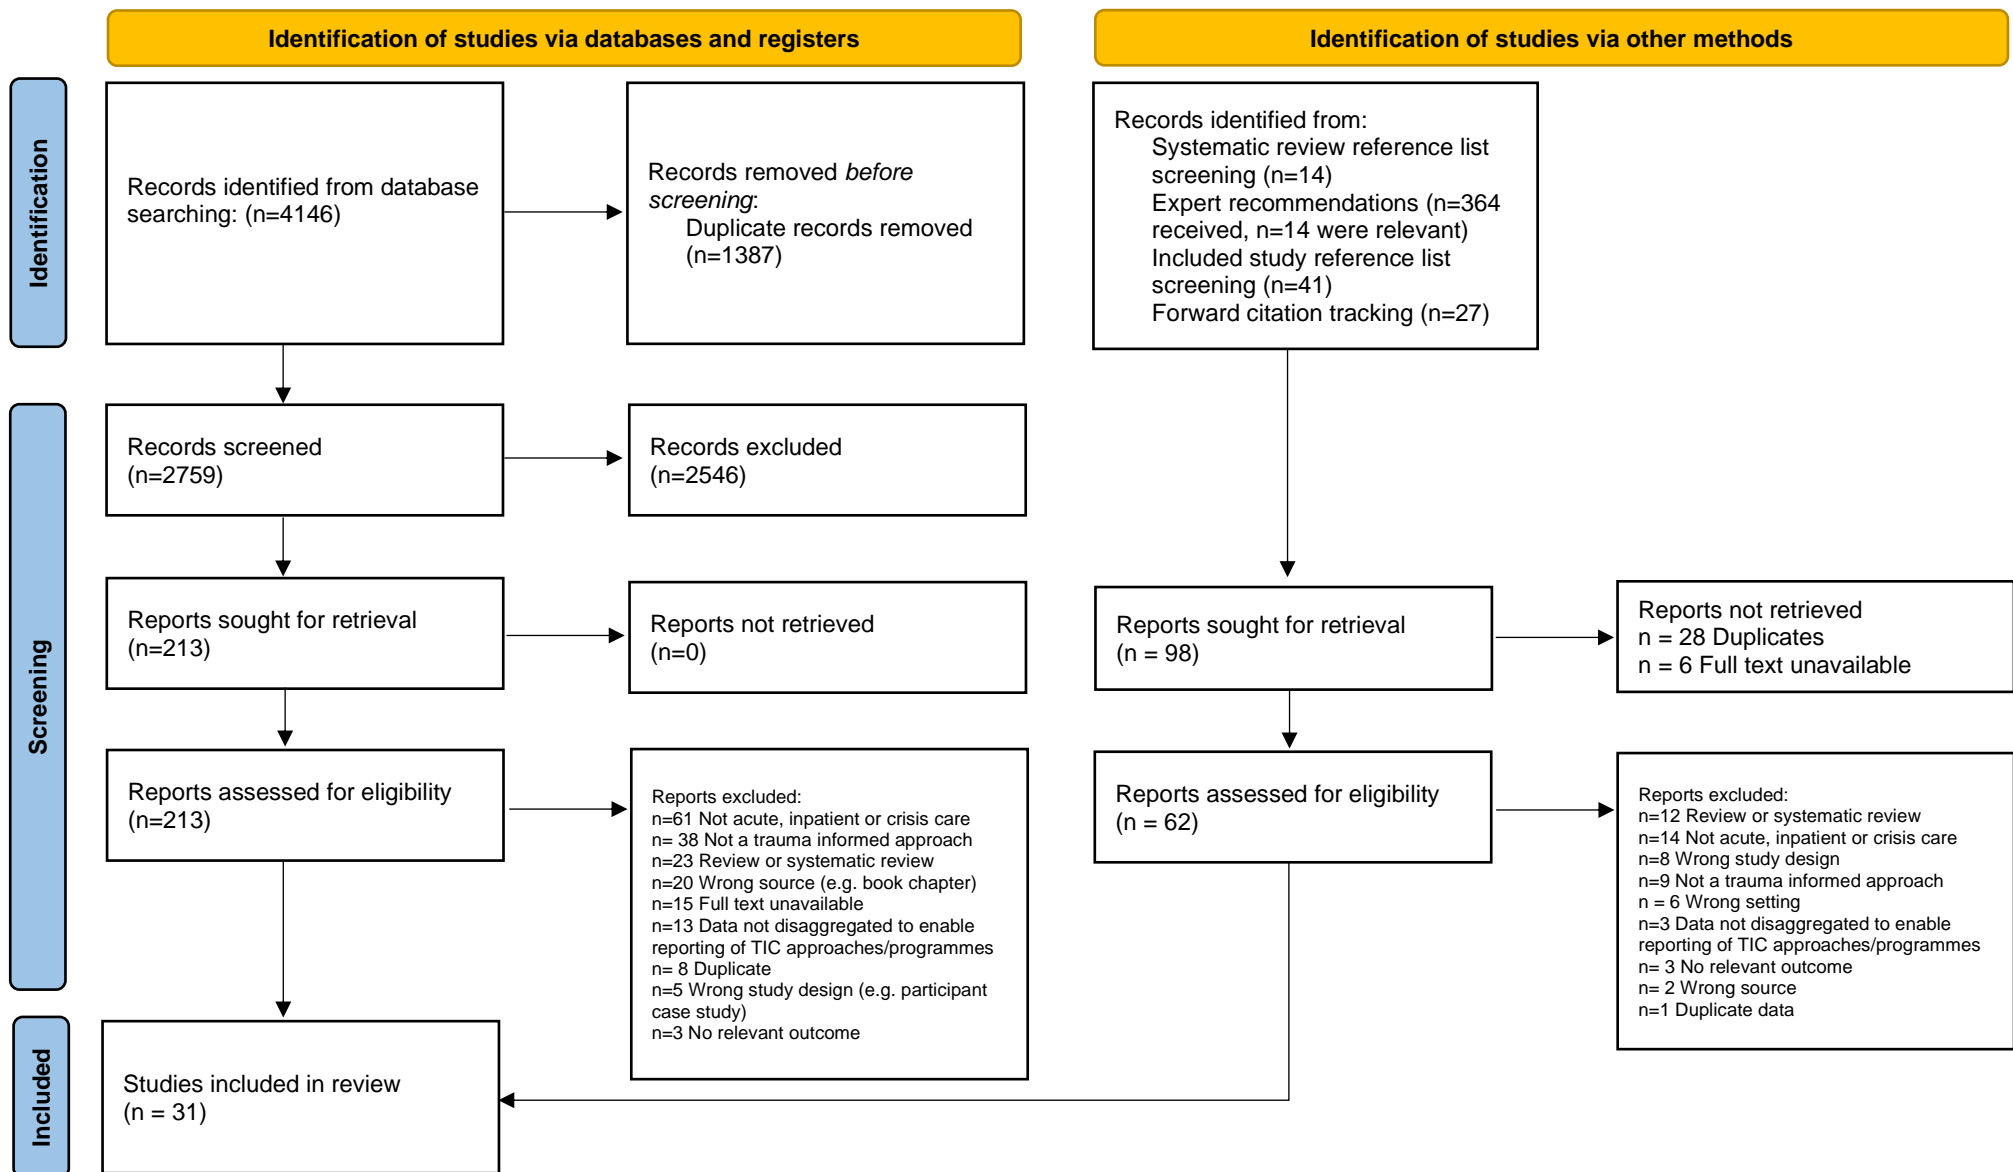

Figure 1: PRISMA diagram demonstrating the search strategy

From: Page MJ, McKenzie JE, Bossuyt PM, Boutron I, Hoffmann TC, Mulrow CD, et al. The PRISMA 2020 statement: an updated guideline for reporting systematic reviews. *BMJ* 2021;372:n71. doi: 10.1136/bmj.n71. For more information, visit: <http://www.prisma-statement.org/>



Table 1 Study characteristics table

| Authors                                                                 | Study Title                                                                                                                                                                | Type of report                | Purpose of study/ study aims                                                                                                   | Region, Country        | Date of data collection / service delivery                                                                                                                                                                                             | Name of and type of service/ setting/ context                                                      | Sample recruitment<br><br>Response rate | Procedure                                                                                                                                                                                                                                                                                                                                                                                                                                                                                                                                                                                                                                                                                                               | Qualitative or qualitative data? | Analysis                                                                                                                                                                                                                                                                                                  |
|-------------------------------------------------------------------------|----------------------------------------------------------------------------------------------------------------------------------------------------------------------------|-------------------------------|--------------------------------------------------------------------------------------------------------------------------------|------------------------|----------------------------------------------------------------------------------------------------------------------------------------------------------------------------------------------------------------------------------------|----------------------------------------------------------------------------------------------------|-----------------------------------------|-------------------------------------------------------------------------------------------------------------------------------------------------------------------------------------------------------------------------------------------------------------------------------------------------------------------------------------------------------------------------------------------------------------------------------------------------------------------------------------------------------------------------------------------------------------------------------------------------------------------------------------------------------------------------------------------------------------------------|----------------------------------|-----------------------------------------------------------------------------------------------------------------------------------------------------------------------------------------------------------------------------------------------------------------------------------------------------------|
| Aremu, Hill, McNeal, Petersen, Swanberg, Delaney (2018)<br><br>(46)     | Implementation of trauma-informed care and brief solution-focused therapy<br>A quality improvement project aimed at increasing engagement on an inpatient psychiatric unit | A quality improvement project | The purpose of the quality improvement project was to educate staff on methods to incorporate TIC into day-to-day practice     | Illinois, USA          | Initial training: January 2017<br><br>2nd wave training: April 2017.<br><br>Data were collected on the number of injectable medications dispensed by pharmacy to the unit per week between 20/10/13 – 14/12/13 and 01/07/15 – 5/10/15. | No name<br><br>Adult inpatient psychiatric unit                                                    | Response rate: Not stated.              | A 2- hour patient engagement training was extended to all staff members.<br><br>Process evaluation involved reviewing data collected 1 month after the initial training and every 3 months post-training and measuring staff attendance at each mandatory training.<br><br>Outcome evaluation involved assessing staff comfort of patient engagement before and after training, reviewing shift documentation and nurses' reflective notes on engagement, and monitoring medications administered.<br><br>All participants completed the 'Management of Aggression and Violence Attitude Scale and Combined Assessment of Psychiatric Environments – brief version' before attending the training, and one month after. | Quantitative                     | Pre-/post-test scores on the CAPE and MAVAS were examined for differences using the Wilcoxon signed rank test for paired data.<br><br>Changes in rates of PRN IM medication administration, and rates of evidence of patient engagement in clinical notes, were described but not statistically analysed. |
| Azeem, Aujla, Rammerth, Binsfeld, and Jones (2011)<br><br>(47)          | Effectiveness of six core strategies based on trauma informed care in reducing seclusions and restraints at a child and adolescent psychiatric hospital                    | Retrospective pre/post study  | To determine the effectiveness of Six Core Strategies in reducing the use of seclusion and restraints with hospitalised youth. | USA, region not stated | All medical records were reviewed for youth hospitalised between July 2004 - March 2007                                                                                                                                                | No name<br><br>Mixed- and single-gender child and adolescent (ages 6-17) hospital psychiatric unit | N/A                                     | Information on restraint and seclusion use was gathered on a standard form completed when a service user was placed in a restraint or seclusion.<br><br>In March 2005, staff at the hospital were trained on the Six Core Strategies in national training.<br><br>The data collected were shared in all staff meetings, regularly with clinical teams, and were posted on the respective units monthly.                                                                                                                                                                                                                                                                                                                 | Quantitative                     | Demographic and clinical variables were reported. Outcomes were described but no statistical analyses performed.                                                                                                                                                                                          |
| Azeem, Reddy, Wudarsky, Carabetta, Gregory & Sarofin (2015)<br><br>(48) | Restraint reduction at a pediatric psychiatric hospital: A ten-year journey                                                                                                | Service description           | To reduce the number of restraints and to provide TIC in a 52-bed paediatric psychiatric hospital.                             | USA, region not stated | 2005 - 2014                                                                                                                                                                                                                            | No name<br><br>Mixed- and single-gender child and adolescent (ages 6-17) unit at a                 | N/A                                     | N/A                                                                                                                                                                                                                                                                                                                                                                                                                                                                                                                                                                                                                                                                                                                     | Quantitative                     | Described some changes in quantitative measures (e.g., rates of restraint) but no statistical analyses reported.                                                                                                                                                                                          |

|                                                                                    |                                                                                                              |                                                     |                                                                                                                                                                                   |                                    |                                                                                                                                                                                                                         |                                                                                            |                                                                                                                                                                                             |                                                                                                                                                                                                                                                                                                                                                                                                                                                                                                                                                                                                                |              |                                                                                                                                                                                                                                                                                                                                                                                            |
|------------------------------------------------------------------------------------|--------------------------------------------------------------------------------------------------------------|-----------------------------------------------------|-----------------------------------------------------------------------------------------------------------------------------------------------------------------------------------|------------------------------------|-------------------------------------------------------------------------------------------------------------------------------------------------------------------------------------------------------------------------|--------------------------------------------------------------------------------------------|---------------------------------------------------------------------------------------------------------------------------------------------------------------------------------------------|----------------------------------------------------------------------------------------------------------------------------------------------------------------------------------------------------------------------------------------------------------------------------------------------------------------------------------------------------------------------------------------------------------------------------------------------------------------------------------------------------------------------------------------------------------------------------------------------------------------|--------------|--------------------------------------------------------------------------------------------------------------------------------------------------------------------------------------------------------------------------------------------------------------------------------------------------------------------------------------------------------------------------------------------|
|                                                                                    |                                                                                                              |                                                     |                                                                                                                                                                                   |                                    |                                                                                                                                                                                                                         | psychiatric hospital                                                                       |                                                                                                                                                                                             |                                                                                                                                                                                                                                                                                                                                                                                                                                                                                                                                                                                                                |              |                                                                                                                                                                                                                                                                                                                                                                                            |
| Beckett, Holmes, Phipps, Patton, & Molloy (2017)<br>(49)                           | Trauma-informed care and practice: Practice improvement strategies in an inpatient mental health ward        | Service evaluation                                  | To improve the quality of care provided to consumers on a mental health ward within an acute inpatient service by establishing TIC on the ward.                                   | Sydney, New South Wales, Australia | The study evaluates the programme over a 3-year period. Specific study dates are not stated.                                                                                                                            | No name<br><br>A psychiatric inpatient ward, with a high dependency unit and an acute unit | N/A                                                                                                                                                                                         | Study procedures not stated.                                                                                                                                                                                                                                                                                                                                                                                                                                                                                                                                                                                   | Mixed        | Not stated                                                                                                                                                                                                                                                                                                                                                                                 |
| Blair, Woolley, Szarek, Mucha, Dutka, Schwartz, Wisniowski & Goethe (2017)<br>(50) | Reduction of seclusion and restraint in an inpatient psychiatric setting: A pilot study                      | Pre/post implementation of intervention pilot study | To describe and evaluate the effectiveness of a quality and safety initiative designed to decrease seclusion and restraint on an inpatient psychiatric service                    | Connecticut, USA                   | Pre-intervention data: October 2008–September 2009<br><br>Post-intervention data: October 2010 – September 2012                                                                                                         | No name<br><br>A mixed gender psychiatric inpatient service of a large urban hospital      | Baseline - all consecutive admissions during the year prior to the intervention: n=3884<br><br>Study sample - all consecutive admissions after the full intervention implementation: n=8029 | Baseline data (e.g., the number and duration of seclusion/restraint events and demographic data) were from all consecutive admissions during the year prior to introduction of the intervention (October 2008–September 2009). The study sample consisted of all consecutive admissions after the intervention was fully implemented (October 2010–September 2012).                                                                                                                                                                                                                                            | Quantitative | Chi-square tests to compare differences in seclusion/restraint incidence in the study versus baseline periods<br><br>t tests to compare seclusion/restraint duration in the study versus baseline periods                                                                                                                                                                                  |
| Boel-Studt (2017)<br>(51)                                                          | A quasi-experimental study of trauma-informed psychiatric residential treatment for children and adolescents | Service evaluation                                  | To examine the effectiveness of a trauma-informed approach implemented in the psychiatric residential treatment facilities of a Behavioural Health Agency serving trauma-affected | Midwestern USA                     | The programme commenced in 2012.<br><br>Data collection for youth in the trauma-informed psychiatric residential treatment group began 12 months following implementation to allow for training and full integration of | No name<br><br>Psychiatric residential facilities of a large Behavioural Health Agency     | N=205<br>Data for this study were extracted from the case records children and adolescents who received either traditional PRT (n=100) or TI-PRT (n=105) services.<br><br>Records           | Data for the comparison group were extracted from the files of 100 youth who were discharged from one of the psychiatric residential treatment facilities within a 13-month period before TIC implementation.<br><br>Data collection for youth in the trauma-informed psychiatric residential treatment group began 12 months following implementation. There were three separate waves over a period of nine months until an adequately powered sample size was achieved.<br><br>Functional impairment was assessed by master's-level clinicians employed by the agency at the time of admission and again at | Quantitative | Repeated measures analysis of variance examined differences between groups on change in functional impairment from admission to discharge.<br><br>Multivariate regression examined differences in average length of time in treatment.<br><br>Logistic regression examined differences in the probability of discharging to a community-based placement versus an institutional placement. |

|                                              |                                                                                                                        |                                                  |                                                                                                                                                             |                   |                                                                                                                                                   |                                                                                                                                                                                                                                |                                                                                             |                                                                                                                                                                                                                                                                                                                                                                                                                                                                                                                                                                                                                                                                                                                                                                                                                                                                                                                                                                                                                                                                            |              |                                                                                                                                                                                                                                                                                                                                                                                                                                                                                                                                                                                                                                                                                          |
|----------------------------------------------|------------------------------------------------------------------------------------------------------------------------|--------------------------------------------------|-------------------------------------------------------------------------------------------------------------------------------------------------------------|-------------------|---------------------------------------------------------------------------------------------------------------------------------------------------|--------------------------------------------------------------------------------------------------------------------------------------------------------------------------------------------------------------------------------|---------------------------------------------------------------------------------------------|----------------------------------------------------------------------------------------------------------------------------------------------------------------------------------------------------------------------------------------------------------------------------------------------------------------------------------------------------------------------------------------------------------------------------------------------------------------------------------------------------------------------------------------------------------------------------------------------------------------------------------------------------------------------------------------------------------------------------------------------------------------------------------------------------------------------------------------------------------------------------------------------------------------------------------------------------------------------------------------------------------------------------------------------------------------------------|--------------|------------------------------------------------------------------------------------------------------------------------------------------------------------------------------------------------------------------------------------------------------------------------------------------------------------------------------------------------------------------------------------------------------------------------------------------------------------------------------------------------------------------------------------------------------------------------------------------------------------------------------------------------------------------------------------------|
|                                              |                                                                                                                        |                                                  | children and adolescents compared to a traditional psychiatric treatment approach previously used.                                                          |                   | the model. Data collection occurred over 9-months.                                                                                                |                                                                                                                                                                                                                                | that contained missing data on key study variables were excluded.<br><br>Response rate: N/A | discharge using the Child and Adolescent Functional Assessment Scale.                                                                                                                                                                                                                                                                                                                                                                                                                                                                                                                                                                                                                                                                                                                                                                                                                                                                                                                                                                                                      |              | Zero-inflated Poisson (ZIP) regression examined group differences in restraint and seclusion.                                                                                                                                                                                                                                                                                                                                                                                                                                                                                                                                                                                            |
| Borckardt et al. (2011) (52)                 | Systematic investigation of initiatives to reduce seclusion and restraint in a state psychiatric hospital              | Cluster-randomised, controlled, cross-over trial | To examine the effect of systematic implementation of behavioural interventions on the rate of seclusion and restraint in an inpatient psychiatric hospital | South-eastern USA | Baseline phase: January 2005 – February 2006<br><br>Implementation phase: March 2006 – March 2008<br><br>Follow-up period: April 2008 – June 2008 | No name<br><br>Five inpatient psychiatric wards at one hospital: an adult unit, a geriatric unit, a general adult unit, a substance abuse unit, and a child and adolescent unit at one large state-funded psychiatric hospital | Response rate: Not stated.                                                                  | A multiple baseline design, implementing an engagement model with four components.<br><br>Each unit was assigned to implement the four components in a different, randomly determined order. Each unit was assigned two separate implementation periods dedicated to making physical changes to the therapeutic environment. Each unit served as its own control from intervention to intervention.<br><br>Number of seclusions and restraints per patient day for each unit and each period of implementation were routinely collected.<br><br>Mean length of stay and mean illness severity rating were collected at each phase of the implementation schedule.<br><br>The patient form and staff form of the Quality of Care measure (Danielson et al) was taken before and after each phase of the intervention rollout.<br><br>There was an observation-only phase at the beginning of implementation. This was extended for most units into the second phase of the implementation schedule before full randomisation of the order of the intervention across units. | Quantitative | Descriptive statistics of key variables were presented.<br><br>The effects of the interventions on rates of seclusion and restraint in the units were measured over time. Rate of seclusion and restraint were permitted to cluster over time.<br><br>Independent t-tests examined changes in patient-reported factors pre- and post-implementation of TIC across all units.<br><br>Paired-sample t tests examined changes in staff members' Quality of Care ratings pre- and post- each stage of implementation.<br><br>Non-parametric Wilcoxon's rank-sum test examined the overall change in mean monthly rate of restraints and seclusions from the baseline to the follow-up phase. |
| Brown, McCauley, Navalta, & Saxe (2013) (53) | Trauma systems therapy in residential settings: Improving emotion regulation and the social environment of traumatised | Description of service implementation            | To provide an overview of the successful adaptation and implementation of trauma Systems Therapy (TST) at three                                             | Boston, USA       | BOSTON Intensive Residential Treatment Program: Between September 2000-2007                                                                       | Names:<br>- Boston Intensive Residential Treatment Program<br>- The Children's Village                                                                                                                                         | Response rate: Not stated.                                                                  | TST was implemented in three residential programs and different sets of outcomes were tracked in each. Each of these programs is described in the article in turn.                                                                                                                                                                                                                                                                                                                                                                                                                                                                                                                                                                                                                                                                                                                                                                                                                                                                                                         | Quantitative | Outcomes were described and some presented graphically. No statistical analyses were conducted.                                                                                                                                                                                                                                                                                                                                                                                                                                                                                                                                                                                          |

|                                                                                 |                                                                                                              |                                                |                                                                                                                                                                                                     |                    |                                                                                               |                                                                                                                                                                                                                                                    |                                                                                                                                                                                   |                                                                                                                                                                                                                                                                                                                                                                                                                                                                                                                            |                           |                                                                                                                                                                                                                                                                                                  |
|---------------------------------------------------------------------------------|--------------------------------------------------------------------------------------------------------------|------------------------------------------------|-----------------------------------------------------------------------------------------------------------------------------------------------------------------------------------------------------|--------------------|-----------------------------------------------------------------------------------------------|----------------------------------------------------------------------------------------------------------------------------------------------------------------------------------------------------------------------------------------------------|-----------------------------------------------------------------------------------------------------------------------------------------------------------------------------------|----------------------------------------------------------------------------------------------------------------------------------------------------------------------------------------------------------------------------------------------------------------------------------------------------------------------------------------------------------------------------------------------------------------------------------------------------------------------------------------------------------------------------|---------------------------|--------------------------------------------------------------------------------------------------------------------------------------------------------------------------------------------------------------------------------------------------------------------------------------------------|
|                                                                                 | children and youth in congregate care                                                                        |                                                | residential facilities                                                                                                                                                                              |                    | The Children's Village:<br>Between January-August 2008<br><br>KVC Health Systems: 2008 - 2009 | - KVC Health Systems, Inc<br><br>Three residential treatment units for young people with severe psychiatric disorders                                                                                                                              |                                                                                                                                                                                   |                                                                                                                                                                                                                                                                                                                                                                                                                                                                                                                            |                           |                                                                                                                                                                                                                                                                                                  |
| Cadiz, Savage, Bonavota, Hollywood, Butters, Neaery & Quiros (2004)<br><br>(54) | The Portal Project: A layered approach to integrating trauma into alcohol and other drug treatment for women | Cross-site study, including process evaluation | To test the Portal model of integrated, gender-sensitive, culturally competent service that considers the multiple domains of trauma, alcohol and other drug problems, mental health and parenting. | New York, USA      | Not stated                                                                                    | Names:<br>- Starhill Residential Drug Treatment Program<br>- Dreitzer - Women and Children's Residential Treatment Center<br><br>Residential treatment programme for women with alcohol/ drug issues, mental health problems and trauma histories. | People entering treatment at either of Palladia's two residential drug treatment programs.<br><br>Response rate: N/A                                                              | Client interviews, case record reviews and fidelity studies based on observations of treatment groups were developed for the Portal Project evaluation.                                                                                                                                                                                                                                                                                                                                                                    | N/A - Service description | Not stated                                                                                                                                                                                                                                                                                       |
| Chandler (2008)<br><br>(55)                                                     | From traditional inpatient to trauma-informed treatment: Transferring control from staff to patient          | Qualitative descriptive study design           | To describe experiences of staff who successfully transitioned from traditional inpatient care to TIC.<br><br>They aimed to describe and compare<br>i) the experiences of staff in                  | Massachusetts, USA | Not stated                                                                                    | No name<br><br>An inpatient psychiatric unit                                                                                                                                                                                                       | Purposive sampling:<br>Staff who worked on the unit for more than 12 years were invited to take part because they spanned the transition between the traditional program and TIC. | After participants gave written informed consent, individuals were interviewed.<br><br>Interviews ranged from 60 to 90 min. Narratives were tape-recorded or handwritten, depending on the interviewees' preference.<br><br>Participants were asked to describe the symptoms that brought patients into the unit. They were then asked to describe changes in patient care over the previous 12 years. The staff narratively described their experience, reflecting on the traditional approach and the transition to TIC. | Qualitative               | Verbatim transcripts were analysed by a nine-step inductive content analysis.<br><br>This step-by-step analysis, an iterative process, occurred following each interview.<br><br>Confirmability, as a measure of scientific rigor, was determined by auditability, credibility, and fittingness. |

|                             |                                                                        |                               |                                                                                                                                                                 |                    |            |                                              |                                                                                                                                                                                                                                                                                                                                                                                                                   |                                                                                                                                                                                                                                                                                                                                                                                                                                                                                                                                                                                                   |             |                                                                                                                                                                                                                                                                                                                                                     |
|-----------------------------|------------------------------------------------------------------------|-------------------------------|-----------------------------------------------------------------------------------------------------------------------------------------------------------------|--------------------|------------|----------------------------------------------|-------------------------------------------------------------------------------------------------------------------------------------------------------------------------------------------------------------------------------------------------------------------------------------------------------------------------------------------------------------------------------------------------------------------|---------------------------------------------------------------------------------------------------------------------------------------------------------------------------------------------------------------------------------------------------------------------------------------------------------------------------------------------------------------------------------------------------------------------------------------------------------------------------------------------------------------------------------------------------------------------------------------------------|-------------|-----------------------------------------------------------------------------------------------------------------------------------------------------------------------------------------------------------------------------------------------------------------------------------------------------------------------------------------------------|
|                             |                                                                        |                               | reducing patient symptoms in a traditional inpatient model and in TIC and ii) how the staff created a trauma-informed culture of safety.                        |                    |            |                                              | Response rate: 10/36                                                                                                                                                                                                                                                                                                                                                                                              | Participants' tape-recorded responses were transcribed verbatim.                                                                                                                                                                                                                                                                                                                                                                                                                                                                                                                                  |             |                                                                                                                                                                                                                                                                                                                                                     |
| Chandler (2012)<br><br>(56) | Reducing use of restraints and seclusion to create a culture of safety | Qualitative single case study | To describe the structure that empowered staff of a locked community hospital unit to reduce the use of restraints and seclusion to create a culture of safety. | Massachusetts, USA | Not stated | No name<br><br>An inpatient psychiatric unit | <p>Researchers attended a staff meeting to explain the study. Following the meeting, individual staff volunteered for the study directly with the researcher.</p> <p>Patients were told that the researchers were visiting to observe a community meeting. Patients asked to recount their experience of the difference between this unit and others they have experienced.</p> <p>Response rate: Not stated.</p> | <p>The PI interviewed staff and leadership; reviewed unit policies on restraint and seclusion; and used participant observation.</p> <p>Individual interviews about restraint, seclusions and safety were arranged with staff in a private location.</p> <p>Voluntary informed consent was obtained, anonymity was maintained through numerically coding digitally recorded and transcribed interviews, and data was stored in a locked location which was only accessed by the PI.</p> <p>Bracketing was used prior to data collection to note the investigators' preconceptions and biases.</p> | Qualitative | <p>An eight-step inductive content analysis was used with the verbatim interview transcripts following each interview and for field notes.</p> <p>This step-by-step analysis was an iterative process that occurred after every interview.</p> <p>Confirmability of the findings was established by auditability, credibility, and fittingness.</p> |

|                                                    |                                                                                                                                                         |                                                                                                                       |                                                                                                                                        |                                                                                                                           |                                                                                                      |                                                                                                                                 |                                                                                                                                                                                                                                                                                                                                                                                                                                              |                                                                                                                                                                                                                                                                                                                                                                                                                                                                                                                                                                                                                                                                                                                                                                                                                                                                                                                                                                                                                                 |                                                             |                                                                                                                                                                                                                                                                                              |
|----------------------------------------------------|---------------------------------------------------------------------------------------------------------------------------------------------------------|-----------------------------------------------------------------------------------------------------------------------|----------------------------------------------------------------------------------------------------------------------------------------|---------------------------------------------------------------------------------------------------------------------------|------------------------------------------------------------------------------------------------------|---------------------------------------------------------------------------------------------------------------------------------|----------------------------------------------------------------------------------------------------------------------------------------------------------------------------------------------------------------------------------------------------------------------------------------------------------------------------------------------------------------------------------------------------------------------------------------------|---------------------------------------------------------------------------------------------------------------------------------------------------------------------------------------------------------------------------------------------------------------------------------------------------------------------------------------------------------------------------------------------------------------------------------------------------------------------------------------------------------------------------------------------------------------------------------------------------------------------------------------------------------------------------------------------------------------------------------------------------------------------------------------------------------------------------------------------------------------------------------------------------------------------------------------------------------------------------------------------------------------------------------|-------------------------------------------------------------|----------------------------------------------------------------------------------------------------------------------------------------------------------------------------------------------------------------------------------------------------------------------------------------------|
| <p>Duxbury et al. (2019)<br/><br/>(57)</p>         | <p>Minimising the use of physical restraint in acute mental health services: The outcome of a restraint reduction programme ('RESTRRAIN YOURSELF').</p> | <p>Non-randomised controlled trial (this paper reports only on outcomes of physical restraint reduction, however)</p> | <p>To test the hypothesis that restraint use would be 40% lower on intervention wards after the introduction of RESTRRAIN YOURSELF</p> | <p>North-west England, comprising five counties; Cheshire, Greater Manchester, Merseyside, Lancashire and Cumbria, UK</p> | <p>January 2015 - February 2016.<br/><br/>The total study duration was 16.7 months on all wards.</p> | <p>No name<br/><br/>11 mixed-gender and 3 single-gender adult, acute mental health wards from seven mental health hospitals</p> | <p>Two acute care wards were targeted from all eligible acute wards within each participating Trust. Matched wards were allocated for each Trust, taking into account restraint use, number of beds and patient demographics. Some Trusts were limited in the wards they could use due to competing interventions being introduced; therefore, non-matched samples had to be used in some instances.<br/><br/>Response rate: Not stated.</p> | <p>Within all participating Trusts, a range of innovations were implemented on the implementation wards within a 'Six Core Strategy' framework. A dedicated improvement adviser worked on the wards one day a week to support the implementation of the approach.<br/><br/>There were three study phases during the course of the project. These were baseline, implementation and adoption.<br/><br/>The implementation phase referred to when the RESTRRAIN YOURSELF adviser was active on the ward (duration mean per ward=5 months, range=3.5-5.5 months).<br/><br/>The baseline phase (mean duration=13.6 months, range=8.1-18.3 months) referred to the study period before implementation.<br/><br/>The adoption phase (mean duration=7.9 months, range=2.4-13.1 months) referred to the improvement stage when the adviser stopped visiting the ward. Staff were encouraged to carry on RESTRRAIN YOURSELF implementation without external support from the project and the continued use of their local champions.</p> | <p>Mixed (this paper only reports quantitative results)</p> | <p>Restraint event rates per 1000 bed-days with 95% confidence intervals were calculated for the intervention and comparator wards across the study period.<br/><br/>Chi-squared tests were used to analyse associations between exposure to the intervention and restraint frequencies.</p> |
| <p>Farragher &amp; Yanosy (2005)<br/><br/>(58)</p> | <p>Creating a trauma-sensitive culture in residential treatment</p>                                                                                     | <p>Service change description</p>                                                                                     | <p>To explain how their staff used the Sanctuary Model to bring about significant changes in</p>                                       | <p>New York, USA</p>                                                                                                      | <p>They began the process of learning about and implementing TIC in 2001</p>                         | <p>Andrus Children's Center<br/><br/>Residential mixed-gender youth treatment</p>                                               | <p>N/A</p>                                                                                                                                                                                                                                                                                                                                                                                                                                   | <p>N/A</p>                                                                                                                                                                                                                                                                                                                                                                                                                                                                                                                                                                                                                                                                                                                                                                                                                                                                                                                                                                                                                      | <p>None</p>                                                 | <p>N/A</p>                                                                                                                                                                                                                                                                                   |

|                                                                                  |                                                                                                                                                  |                    |                                                                                                                                                                                                                                                                   |                    |                                                                                                                                                                                                                                                                                                                                                                                                                                                                                        |                                                                                                                        |     |                                                                                                                                                                                                                                                                                                                                                                                                                                                                                                                                                                                                                                                                                                                                                                                                                                                                                                                                                                                                                                                                                                                         |              |                                                                                                                                                                                                                                                                                                                           |
|----------------------------------------------------------------------------------|--------------------------------------------------------------------------------------------------------------------------------------------------|--------------------|-------------------------------------------------------------------------------------------------------------------------------------------------------------------------------------------------------------------------------------------------------------------|--------------------|----------------------------------------------------------------------------------------------------------------------------------------------------------------------------------------------------------------------------------------------------------------------------------------------------------------------------------------------------------------------------------------------------------------------------------------------------------------------------------------|------------------------------------------------------------------------------------------------------------------------|-----|-------------------------------------------------------------------------------------------------------------------------------------------------------------------------------------------------------------------------------------------------------------------------------------------------------------------------------------------------------------------------------------------------------------------------------------------------------------------------------------------------------------------------------------------------------------------------------------------------------------------------------------------------------------------------------------------------------------------------------------------------------------------------------------------------------------------------------------------------------------------------------------------------------------------------------------------------------------------------------------------------------------------------------------------------------------------------------------------------------------------------|--------------|---------------------------------------------------------------------------------------------------------------------------------------------------------------------------------------------------------------------------------------------------------------------------------------------------------------------------|
|                                                                                  |                                                                                                                                                  |                    | the children, staff, and organisation as a whole.                                                                                                                                                                                                                 |                    |                                                                                                                                                                                                                                                                                                                                                                                                                                                                                        | unit for children with severe emotional problems                                                                       |     |                                                                                                                                                                                                                                                                                                                                                                                                                                                                                                                                                                                                                                                                                                                                                                                                                                                                                                                                                                                                                                                                                                                         |              |                                                                                                                                                                                                                                                                                                                           |
| Forrest, Gervais, Lord, Sposato, Martin, Beserra & Spinazzola (2018)<br><br>(59) | Building communities of care: A comprehensive model for trauma-informed youth capacity building and behaviour management in residential services | Service evaluation | To conduct a preliminary evaluation of two programs investigating whether Building Communities of Care's (BCC) unique approach to embedded behaviour management in treatment of youth results in reduced restraint, improved safety, and shortened length of stay | Massachusetts, USA | Introduction of BCC:<br>Program 1 - December 2013.<br>Program 2 - March 2016.<br><br>Retrospective, naturalistic, aggregate data was collected from 2012-2017.<br><br>Data on length of stay, number of restraints, and worker's compensation claims was included from January 2012 to September 2017.<br><br>Data on position of restraints, number of client restraint-related injury, and number of staff restraint-related injuries was included from January 2014 when available. | No name<br><br>Residential mixed-gender treatment programmes for young people (ages 12-22 years) with mental disorders | N/A | Length of stay data was recorded by program directors in months and reported to quality improvement and management personnel monthly.<br><br>Number of restraints was routinely collected internally by the agency as part of its critical incidents tracking and risk reduction efforts.<br><br>Program directors reported the data in aggregate to quality improvement and management personnel at the end of each quarter.<br><br>The programs' insurer provided number and total yearly monetary value of worker's compensation claims.<br><br>Data on position of restraints, and number of client and staff restraint-related injuries were collected from annual reports to an overseeing government agency. Position of restraints data was collected immediately after restraint occurrence in a mandatory report of the incident.<br><br>Similarly, data on client restraint-related injury and staff restraint-related injury was collected immediately after the incident, with injuries categorised as either minor (requiring on site medical treatment) or major (requiring further medical assistance). | Quantitative | Quantitative measures are described and presented graphically, but no statistical analyses were conducted.<br><br>Total yearly monetary value of worker's compensations claims was averaged per claim and per quarter for this evaluation.<br><br>Length of stay was averaged across all clients by year for examination. |
| Goetz & Taylor-Trujillo (2012)<br><br>(60)                                       | A change in culture: violence prevention in an acute                                                                                             | Service evaluation | To describe the development of the patient-focused                                                                                                                                                                                                                | Midwestern USA     | The PFI model was initiated in 2005                                                                                                                                                                                                                                                                                                                                                                                                                                                    | No name<br><br>Four psychiatric services: a residential                                                                | N/A | The data on seclusion and restraint, Code Gray episodes, and staff injuries were collected by the hospital as part of their routine monitoring. The staff safety survey (is a biannual survey with 10 Likert-style questions focusing on staff's perceptions of the                                                                                                                                                                                                                                                                                                                                                                                                                                                                                                                                                                                                                                                                                                                                                                                                                                                     | Quantitative | Descriptive statistics describing the data for each indicator were reported and presented graphically.                                                                                                                                                                                                                    |

|                        |                                                                                                                                                   |                |                                                                                                                                                                                                                                                                                                                                                |                             |                                                                                                                               |                                                                                                                                                                                                                 |                            |                                                                                                                                                                                                                                                                                                                                                                                                                                                                                                                                                                                                                                                                                                                                                                                                                                                                                                       |              |                                                                                                                                                                                                                                                                                                                                                                                                                                                                                                                                                                                                                                                                                                                                                                                                                           |
|------------------------|---------------------------------------------------------------------------------------------------------------------------------------------------|----------------|------------------------------------------------------------------------------------------------------------------------------------------------------------------------------------------------------------------------------------------------------------------------------------------------------------------------------------------------|-----------------------------|-------------------------------------------------------------------------------------------------------------------------------|-----------------------------------------------------------------------------------------------------------------------------------------------------------------------------------------------------------------|----------------------------|-------------------------------------------------------------------------------------------------------------------------------------------------------------------------------------------------------------------------------------------------------------------------------------------------------------------------------------------------------------------------------------------------------------------------------------------------------------------------------------------------------------------------------------------------------------------------------------------------------------------------------------------------------------------------------------------------------------------------------------------------------------------------------------------------------------------------------------------------------------------------------------------------------|--------------|---------------------------------------------------------------------------------------------------------------------------------------------------------------------------------------------------------------------------------------------------------------------------------------------------------------------------------------------------------------------------------------------------------------------------------------------------------------------------------------------------------------------------------------------------------------------------------------------------------------------------------------------------------------------------------------------------------------------------------------------------------------------------------------------------------------------------|
|                        | behavioral health setting                                                                                                                         |                | intervention (PFI) model and its impact on the reduction of patient violence and staff injuries at a behavioural health service hospital                                                                                                                                                                                                       |                             |                                                                                                                               | treatment program for female adolescents (12-18y), an acute inpatient adolescent unit (12-18 y), an adult inpatient unit (19y>), and a sub-acute unit for adults with substance use and mental health problems. |                            | environment, their training and patient aggression management) was developed by the hospital leadership.                                                                                                                                                                                                                                                                                                                                                                                                                                                                                                                                                                                                                                                                                                                                                                                              |              | The staff survey was scored by averaging staff scores for each question, and then aggregate scores on each question were compared across previous years.                                                                                                                                                                                                                                                                                                                                                                                                                                                                                                                                                                                                                                                                  |
| Gonshak (2011)<br>(61) | Analysis of trauma symptomology, trauma-informed care, and student-teacher relationships in a residential treatment center for female adolescents | Pre-post study | To investigate i) the extent to which student trauma symptomology, staff beliefs about TIC, and staff quality interactions with students in the classroom, related to students' perceptions of their relationships with their staff member; ii) the extent to which training staff in a trauma-informed framework is associated with increased | Louisville , Kentucky , USA | Data were collected from January 2009 – May 2009<br><br>Risking Connection teacher training was implemented in mid-March 2009 | Maryhurst Inc. residential treatment center<br><br>Female adolescents in a residential treatment centre for children who have severe emotional difficulties                                                     | Response rate: Not stated. | Procedures included classroom observations and the administration of surveys to both teachers and students.<br><br>Student observations and surveys examined student change associated with the teacher changes after the implementation of the Risking Connection training intervention.<br><br>Data were collected at four time points from students and two time points from teachers in late January 2009 and over the next five months.<br><br>Teachers were given surveys and were observed once pre-intervention and once post-intervention. Service users were given surveys twice pre-intervention and twice post-intervention.<br><br>Data collection was completed by university faculty researchers and graduate research assistants with the assistance of Maryhurst direct-care staff. Standardised instruction was provided to the participants at each time point of data collection. | Quantitative | Multiple regression analyses determined the extent to which students' trauma symptomatology, teacher beliefs about trauma-informed care, and teachers' emotionally supportive behaviour were associated with the students' perception of the student-teacher relationship.<br><br>Descriptive statistics were provided following teacher scores: Risking Connection Curriculum Assessment, Trauma-Informed Care Belief Measure, Teacher Fidelity to Risking Connection, and CLASS-Emotional Support subscale before and after the intervention. Paired sample t-tests compared the four teach measure scores pre-test and post-test, and effect sizes were calculated.<br><br>Pre- and post-test changes in student attributes were conducted comparing change between the two pre-tests and change between the two post- |



|                  |                                                                                            |                |                                                                                                                                                                                                                                                                          |               |                   |                                                                                   |                            |                                                                                                                                                                                                                                                                                                                                                                                                                                                                                                                                                                           |              |                                                                                                                                                                                                                                                          |
|------------------|--------------------------------------------------------------------------------------------|----------------|--------------------------------------------------------------------------------------------------------------------------------------------------------------------------------------------------------------------------------------------------------------------------|---------------|-------------------|-----------------------------------------------------------------------------------|----------------------------|---------------------------------------------------------------------------------------------------------------------------------------------------------------------------------------------------------------------------------------------------------------------------------------------------------------------------------------------------------------------------------------------------------------------------------------------------------------------------------------------------------------------------------------------------------------------------|--------------|----------------------------------------------------------------------------------------------------------------------------------------------------------------------------------------------------------------------------------------------------------|
|                  |                                                                                            |                | staff knowledge about trauma, increased beliefs about the effectiveness of TIC, and increased quality staff classroom behaviours; as well as improved student perceptions of staff relationships and decreased student report of trauma symptoms.                        |               |                   |                                                                                   |                            |                                                                                                                                                                                                                                                                                                                                                                                                                                                                                                                                                                           |              | tests. Trends across time were also examined using means at all student time points.                                                                                                                                                                     |
| Hale (2019) (62) | Implementation of a trauma-informed care program for the reduction of crisis interventions | Pre-post study | To test the hypothesis that implementation of the Six Core Strategies in a child and adolescent behavioural health hospital would lead to a 25% decrease in rates of physical holds and seclusion for patients 6 months after implementation, and reduce the risk of re- | Illinois, USA | May-November 2018 | No name<br><br>Child and adolescent (3-17y) inpatient behavioural health hospital | Response rate: Not stated. | Implementation of TIC took 3 weeks as each staff member has an opportunity to attend weekly educational sessions that focused on each of the six core strategies. Department leaders were aware of the time commitments this project initiative would take and agreed to let their team members participate.<br><br>The leadership team was provided TIC training first.<br><br>Once training was complete, the researcher obtained routine data on use of holds and seclusions at the end of each month.<br><br>Deidentified information was provided to the researcher. | Quantitative | Descriptive statistics were provided for the numbers of physical holds and seclusions in the six months prior to implementation of TIC, and in the six months after. Data were also presented graphically.<br><br>No statistical analyses were performed |

|                                               |                                                                                                                                |                                                                        |                                                                                                                                                                                                                                                   |                                    |                                                                                                                                       |                                                                                                                      |                                                                                                                                                                                                     |                                                                                                                                                                                                                                                                                                                                                                                                                                                                                                                                           |              |                                                                                                                                                                                                                                                                                               |
|-----------------------------------------------|--------------------------------------------------------------------------------------------------------------------------------|------------------------------------------------------------------------|---------------------------------------------------------------------------------------------------------------------------------------------------------------------------------------------------------------------------------------------------|------------------------------------|---------------------------------------------------------------------------------------------------------------------------------------|----------------------------------------------------------------------------------------------------------------------|-----------------------------------------------------------------------------------------------------------------------------------------------------------------------------------------------------|-------------------------------------------------------------------------------------------------------------------------------------------------------------------------------------------------------------------------------------------------------------------------------------------------------------------------------------------------------------------------------------------------------------------------------------------------------------------------------------------------------------------------------------------|--------------|-----------------------------------------------------------------------------------------------------------------------------------------------------------------------------------------------------------------------------------------------------------------------------------------------|
|                                               |                                                                                                                                |                                                                        | traumatisation                                                                                                                                                                                                                                    |                                    |                                                                                                                                       |                                                                                                                      |                                                                                                                                                                                                     |                                                                                                                                                                                                                                                                                                                                                                                                                                                                                                                                           |              |                                                                                                                                                                                                                                                                                               |
| Hale & Wendler (2020) (63)                    | Evidence-based practice: Implementing trauma-informed care of children and adolescents in the inpatient psychiatric setting    | Description of service implementation, and pre/post intervention study | To investigate the impact of implementation of TIC in an inpatient psychiatric setting versus routine care was on rates of use of physical holds and seclusion at 6 and 12-months post-implementation among children and adolescents (ages 3-17). | USA, region not stated             | October 2017 - April 2019                                                                                                             | No name<br><br>A child and adolescent (ages 4-17 years) psychiatric hospital                                         | N/A                                                                                                                                                                                                 | The problem of too many uses of physical restraint and seclusion interventions was communicated to staff over 2 months before educational interventions focusing on TIC (with a focus on de-escalation techniques) were implemented. Multidisciplinary discussions and retooling of patient treatment and care plans began following the educational interventions. Implementation of video review debriefings followed 2 months later.<br><br>The entire process took 6 months. Culture change was in place by the end of the 12 months. | Quantitative | The number of uses of restraint and seclusion events 6 months before and after implementation were reported, and the changes in these figures described.<br><br>No statistical analyses were performed.                                                                                       |
| Isobel & Edwards (2017) (64)                  | Using trauma informed care as a nursing model of care in an acute inpatient mental health unit: A practice development process | Mixed methods case study                                               | To describe the process and effects on the nursing workforce of implementing a trauma-informed model of care in an acute mental health inpatient unit using a Practice Development process.                                                       | Sydney, New South Wales, Australia | Practice development project commenced in October 2012.<br><br>Interviews were conducted in May 2014, 18 months post-implementation . | No name<br><br>An acute mental health inpatient unit                                                                 | A purposive, convenience sample of nurses participated as determined by length of experience, involvement with the project and availability at time of interview.<br><br>Response rate: Not stated. | Semi-structured interviews with nurses were conducted on the unit by a research assistant.<br><br>Nurses were asked about how they felt about the changes occurring within trauma-informed care framework, the effects on their day-to-day work, consumers, the team and how they felt about their roles.<br><br>Interviews were audio-recorded and transcribed.                                                                                                                                                                          | Qualitative  | Transcripts were analysed using an inductive conventional content analysis.<br><br>Transcripts were examined to identify themes and emerging expressions of experiences. These themes and expressions were compared to identify similarities and differences.                                 |
| Jacobowitz, Moran, Best, & Mensah (2015) (65) | Post-traumatic stress, trauma-informed care, and compassion fatigue in psychiatric hospital staff: A correlational study       | Cross-sectional correlational study                                    | To explore whether there is a correlation between inpatient psychiatric health care workers' i) experience of                                                                                                                                     | New York, USA                      | Data collection occurred between November 2011 - May 2012                                                                             | No name<br><br>A psychiatric hospital, providing short-term acute care in the following units: general adults, child | Convenience sample of inpatient psychiatric health care workers, consisting of registered nurses, psychiatric                                                                                       | Two trained research assistants met with the hospital staff to explain the study and solicit their participation.<br><br>A semi-structured questionnaire asked participants to identify their job title, usual shift, age, gender, years of psychiatric work experience, education level, height, build, living arrangement, when they last participated in patient aggression                                                                                                                                                            | Quantitative | The data were screened for outliers. 7% of the data were excluded. The data also were examined for missing values. 8.1% of participants failed to complete at least one of the questionnaires. There were no significant patterns the missing data. Missing data were replaced using the SPSS |

|                   |                                                                                                                                                                                             |             |                                                                                                                                                                                         |                     |            |                                                                                                                                |                                                                                                                                                                                                                                                                                                                                                                             |                                                                                                                                                                                                                                                                                                                                                                                                                                                                                     |             |                                                                                                                                                                                                                                                                                                                                                                                                                                                                                                                                                                                                                                                                                                                                                                                                                                                                                     |
|-------------------|---------------------------------------------------------------------------------------------------------------------------------------------------------------------------------------------|-------------|-----------------------------------------------------------------------------------------------------------------------------------------------------------------------------------------|---------------------|------------|--------------------------------------------------------------------------------------------------------------------------------|-----------------------------------------------------------------------------------------------------------------------------------------------------------------------------------------------------------------------------------------------------------------------------------------------------------------------------------------------------------------------------|-------------------------------------------------------------------------------------------------------------------------------------------------------------------------------------------------------------------------------------------------------------------------------------------------------------------------------------------------------------------------------------------------------------------------------------------------------------------------------------|-------------|-------------------------------------------------------------------------------------------------------------------------------------------------------------------------------------------------------------------------------------------------------------------------------------------------------------------------------------------------------------------------------------------------------------------------------------------------------------------------------------------------------------------------------------------------------------------------------------------------------------------------------------------------------------------------------------------------------------------------------------------------------------------------------------------------------------------------------------------------------------------------------------|
|                   |                                                                                                                                                                                             |             | traumatic events, ii) resilience to stress, iii) attitude/confidence in managing violent patient situations, and iv) compassion fatigue with respect to post-traumatic stress symptoms. |                     |            | and adolescents, older adults, chemical dependency                                                                             | aides, assistant counsellors, psychiatrists, case coordinators and therapeutic rehabilitation specialists.<br><br>Response rate:<br>Out of a total of 250 direct patient-care employees working at the hospital, 172 returned surveys (68.8% return rate).<br><br>Of the returned surveys, 158 had complete information (8.1% of returned surveys had missing information). | management training, and when they last participated in a TIC meeting. Each question provided between two to seven answer choices from which participants selected the best response.<br><br>Participants received a token of appreciation (a pen) for placing their questionnaires in a locked box.<br><br>Only the PI had access to the contents of the box while it was at the research site.                                                                                    |             | function for linear interpolation.<br><br>Normality of continuous variable distributions was assessed using the Kolmogorov-Smirnov Test. Only the Burnout subscale of the Professional Quality of Life Scale met the assumption of normality.<br><br>The alpha level was set at .05, and two-tailed analyses were used for all of the tests.<br><br>The Post-Traumatic Checklist variable was transformed and adjusted using the scores on the Life Events Checklist. Correlations between the adjusted PCL-C scores, the demographic variables and standardised measures were analysed using Spearman correlation coefficients. The Kruskal-Wallis H-Test and the Mann-Whitney U-Test compared the Adjusted PCL-C scores to the demographic variables.<br><br>Significant relationships were entered into a Hierarchical Linear Regression Analysis to determine a best-fit model. |
| Jones (2021) (66) | How distress is understood and communicated by women patients detained in high secure forensic healthcare, and how nurses interpret that distress: An exploration using a multi-perspective | Qualitative | To explore how women patients in high secure healthcare understand and communicate their distress, as well as how nurses interpret the women patients'                                  | Nottinghamshire, UK | Not stated | National High Secure Healthcare Service for Women (NHSWSW)<br><br>National high secure inpatient psychiatric service for women | Each team was approached independently, and each patient considered in terms of capacity to consent. The study was explained to the patient group and                                                                                                                                                                                                                       | This study adopted a co-production approach and used feminist principles as a framework.<br><br>A working party, including the researcher and voluntary patients (n=8-13 depending on availability) facilitated the research process.<br><br>Patients used the Personal Distress Signature (PDS) to record descriptions of their experience of distress and associated protective factors.<br><br>Twenty patients volunteered the written content of their PDS to form the basis of | Qualitative | The audiotaped interviews and handwritten notes were transcribed by the researcher.<br><br>Multi-perspective Interpretative Phenomenological Analysis (IPA) was used to analyse semi-structured interviews.<br><br>Analysis of the data was presented to the women patients for in-depth review and were also subject to peer                                                                                                                                                                                                                                                                                                                                                                                                                                                                                                                                                       |

|                                         |                                                            |                    |                                                                                                                                                                                                                                                      |                   |            |                                                      |                                                                                                                                                                                                                                                   |                                                                                                                                                                                                                                                                                                                                                                                                                                                                                                                                                                                                                                                                                                                                                                                                                                                                                                                                                                                                                                                                                                                                                                                                                                                                                                                                                                                                                                                                                                                                                                                                                |              |                                                                                                                                                                        |
|-----------------------------------------|------------------------------------------------------------|--------------------|------------------------------------------------------------------------------------------------------------------------------------------------------------------------------------------------------------------------------------------------------|-------------------|------------|------------------------------------------------------|---------------------------------------------------------------------------------------------------------------------------------------------------------------------------------------------------------------------------------------------------|----------------------------------------------------------------------------------------------------------------------------------------------------------------------------------------------------------------------------------------------------------------------------------------------------------------------------------------------------------------------------------------------------------------------------------------------------------------------------------------------------------------------------------------------------------------------------------------------------------------------------------------------------------------------------------------------------------------------------------------------------------------------------------------------------------------------------------------------------------------------------------------------------------------------------------------------------------------------------------------------------------------------------------------------------------------------------------------------------------------------------------------------------------------------------------------------------------------------------------------------------------------------------------------------------------------------------------------------------------------------------------------------------------------------------------------------------------------------------------------------------------------------------------------------------------------------------------------------------------------|--------------|------------------------------------------------------------------------------------------------------------------------------------------------------------------------|
|                                         | interpretative phenomenological analysis                   |                    | distress. The study seeks to provide profound and meaningful insights into the lived experience of psychological distress on thoughts, emotions and behaviours for women patients in the National High Secure Healthcare Service for Women (NHSHSW). |                   |            |                                                      | nurses via community and multidisciplinary team meetings.<br><br>Named nurses of patient participants were approached. Informed consent was gained from all participants. All named nurses agreed to take part.<br><br>Response rate: Not stated. | interviews. Contents of these PDSs were thematically analysed to develop the semi-structured interview guide to explore patients' perspectives on distress. Speech and language specialists were consulted to adapt the questions and prompts to make them accessible to people with communication difficulties.<br><br>Themes were presented back to the patient group for validation. Pilot interviews were conducted. Individual semi-structured interviews were conducted with volunteer patients and participating nurses.<br><br>Focus groups were facilitated by facilitators. Not all participants agreed to audio-recording so handwritten notes were made on flip chart paper. Patients and staff facilitating took turns taking notes. Information from the focus groups was presented to individual patients who did not attend the focus group (e.g., due to being in seclusion) and they contributed. Their contributions were fed back to the group.<br><br>Individual patient interviews lasting 30 minutes or less were conducted in a private room. Participants were given the option for the interview to be audio-recorded. The interview could be conducted over two sessions if preferred.<br><br>Nurse interviews took place in the same interview room or in a staff room. They were also given the option for the interview to be audio-recorded.<br><br>There was regular liaison with operational managers to ensure that practical support for women was provided to attend groups. Nurses were briefed to check-in with and provide emotional support to participants if needed. |              | review. Quality of analysis was ensured via independent reviews completed by practitioners familiar with IPA methods                                                   |
| Korchmaros, Greene & Murphy (2021) (67) | Implementing trauma-informed research-supported treatment: | Longitudinal study | The study examined programme fidelity and the feasibility and                                                                                                                                                                                        | South-western USA | Not stated | No name<br><br>A mixed-gender adolescent residential | At all time points, all agency staff were invited via email to complete an                                                                                                                                                                        | Survey data was collected from agency staff at:<br>4 months (Time 1)<br>1.25 years (Time 2)<br>2.25 years (Time 3) into implementation of the TI-RSTs.                                                                                                                                                                                                                                                                                                                                                                                                                                                                                                                                                                                                                                                                                                                                                                                                                                                                                                                                                                                                                                                                                                                                                                                                                                                                                                                                                                                                                                                         | Quantitative | Single-sample, 1-tailed t tests were used to test whether staff, on average i) agreed that the TI-RSTs were implemented with fidelity and they agreed that the TI-RSTs |

|                                    |                                                                                                           |                                                                                                                                                    |                                                                                                                                                                 |                           |                                                                                                                                                      |                                                              |                                                                                                                                                         |                                                                                                                                                                                                                                                                                                                                                                                                                                                                                                                                                                                                                                                                                                                                                                                             |             |                                                                                                                                                                                                                                                                                                                                                                                                                                                                                                                                                                                                                                                                                                                                                                        |
|------------------------------------|-----------------------------------------------------------------------------------------------------------|----------------------------------------------------------------------------------------------------------------------------------------------------|-----------------------------------------------------------------------------------------------------------------------------------------------------------------|---------------------------|------------------------------------------------------------------------------------------------------------------------------------------------------|--------------------------------------------------------------|---------------------------------------------------------------------------------------------------------------------------------------------------------|---------------------------------------------------------------------------------------------------------------------------------------------------------------------------------------------------------------------------------------------------------------------------------------------------------------------------------------------------------------------------------------------------------------------------------------------------------------------------------------------------------------------------------------------------------------------------------------------------------------------------------------------------------------------------------------------------------------------------------------------------------------------------------------------|-------------|------------------------------------------------------------------------------------------------------------------------------------------------------------------------------------------------------------------------------------------------------------------------------------------------------------------------------------------------------------------------------------------------------------------------------------------------------------------------------------------------------------------------------------------------------------------------------------------------------------------------------------------------------------------------------------------------------------------------------------------------------------------------|
|                                    | Fidelity, feasibility, and acceptability                                                                  |                                                                                                                                                    | acceptability of implementing trauma-informed research-supported treatments (TI-RSTs) at an adolescent residential substance misuse treatment agency over time. |                           |                                                                                                                                                      | substance misuse treatment agency                            | online survey or to complete paper copies of the survey. Staff held diverse roles.<br><br>Response rate: Not stated.                                    | An independent research assistant set up a laptop in a private area at the treatment agency for staff without computer access and made attempts to encourage completion of the survey. Staff completed surveys anonymously and privately. No demographic information was collected on individual surveys to preserve anonymity.                                                                                                                                                                                                                                                                                                                                                                                                                                                             |             | were implemented correctly ii) agreed that implementing the TI-RSTs was feasible such that staff agreed that their agency was capable of making and sustaining change; their agency was ready to implement the TI-RST, and agency leaders were prepared to implement the TI-RST iii) agreed that implementing the TI-RSTs was acceptable and the TI-RSTs improved client outcomes, iv) there were greater than moderate attitudes towards RSTs and being more than slightly satisfied with the TI-RSTs.<br><br>ANOVAs assessed changes over time, differences across type of TI-RST, and differences across related types of fidelity and feasibility measures, or indicators.<br><br>The data collected at Times 1, 2, and 3 were treated as independent in analyses. |
| Kramer, Michael George (2016) (68) | Sanctuary in a residential treatment center: Creating a therapeutic community of hope countering violence | Qualitative, data included: group observation; content analysis of agency documents and quantitative data; focus groups; and individual interviews | To determine how and why the Sanctuary model works in decreasing trauma symptoms with a population of court-committed youth.                                    | USA, region not specified | The Sanctuary Model was implemented over a three-year period (exact dates not provided).<br><br>Group observation took place over a year and a half. | No name Forensic male adolescent residential treatment unit. | Participants were introduced to the researcher, provided with information about the study and invited to participate.<br><br>Response rate: Not stated. | The researcher began as a non-participatory observer of administrative and clinical team meetings, individual service plan meetings, and community meetings over a year and a half. Field notes were kept and general themes were extracted.<br><br>The researchers obtained access to organisational records and documents, and minutes of Core Team, and Red Flag Review meetings, covering the three-year period of implementing Sanctuary. The researcher examined their content for emergent themes.<br><br>Focus groups (30-60 minutes) were conducted; two for staff and three for service users. The groups were recorded and transcribed verbatim. They were held in an administrative conference room. For service users, focus groups were held in residential conference rooms. | Qualitative | The digital audio-recordings of focus groups and the planned individual interview were transcribed verbatim.<br><br>Grounded theory and utilisation-focused evaluation were used to analyse the data.                                                                                                                                                                                                                                                                                                                                                                                                                                                                                                                                                                  |

|                                                           |                                                                                                                        |                          |                                                                                                                                                                  |                   |                           |                                                                                                               |                                                                                                                                                                                                                                                                                                                                                                                  |                                                                                                                                                                                                                                                                                                                                                                                                                                                                                               |              |                                                                                                                                                                                                                                                                                                                                                                                                                                                                                                                                                                                                                                                                                                                                                                                                                                                                                                                                                                                              |
|-----------------------------------------------------------|------------------------------------------------------------------------------------------------------------------------|--------------------------|------------------------------------------------------------------------------------------------------------------------------------------------------------------|-------------------|---------------------------|---------------------------------------------------------------------------------------------------------------|----------------------------------------------------------------------------------------------------------------------------------------------------------------------------------------------------------------------------------------------------------------------------------------------------------------------------------------------------------------------------------|-----------------------------------------------------------------------------------------------------------------------------------------------------------------------------------------------------------------------------------------------------------------------------------------------------------------------------------------------------------------------------------------------------------------------------------------------------------------------------------------------|--------------|----------------------------------------------------------------------------------------------------------------------------------------------------------------------------------------------------------------------------------------------------------------------------------------------------------------------------------------------------------------------------------------------------------------------------------------------------------------------------------------------------------------------------------------------------------------------------------------------------------------------------------------------------------------------------------------------------------------------------------------------------------------------------------------------------------------------------------------------------------------------------------------------------------------------------------------------------------------------------------------------|
|                                                           |                                                                                                                        |                          |                                                                                                                                                                  |                   |                           |                                                                                                               |                                                                                                                                                                                                                                                                                                                                                                                  | Three 30–60-minute individual interviews were conducted: two impromptu and one planned with staff. Two interviews occurred after chance meetings (not transcribed as the researcher did not have the audio-recorder). The interviews were conducted in an office, with the third interview requested in lieu of being a staff focus group participant. This interview was audio-recorded and transcribed, conducted in an administrative meeting room.                                        |              |                                                                                                                                                                                                                                                                                                                                                                                                                                                                                                                                                                                                                                                                                                                                                                                                                                                                                                                                                                                              |
| Niimura, Nakanishi, Okumura, Kawano & Nishida (2019) (69) | Effectiveness of 1-day trauma-informed care training programme on attitudes in psychiatric hospitals: A pre–post study | Pre-post study           | To evaluate the effects of a TIC training programme on attitudes towards TIC practice in mental health professionals, using standardised measurement instruments | Tokyo, Japan      | March 2018 - June 2018    | Tokyo Metropolitan Institute of Medical Science<br><br>29 inpatient psychiatric hospitals across Tokyo, Japan | All hospitals with psychiatric beds in Tokyo and its suburban prefectures (Kanagawa, Saitama, Chiba, and Yamanashi) were approached. The invitation letter included information regarding a 1-day TIC training programme. Mental health professionals voluntarily responded to the research team to participate in the TIC training programme.<br><br>Response rate: Not stated. | Participants attended the 1-day TIC training programme.<br><br>The programme was run and co-facilitated by some of the authors.<br><br>After the TIC training programme, participants received a gift card worth 100 yen (\$9.03 USD) for attending.<br><br>Self-rated questionnaires, including the Attitude Related Trauma-Informed Scale (ARTIC-35) and a self-rated questionnaire developed by the study authors, were administered at pre-training, post-training and 3-month follow-up. | Quantitative | Participants characteristics were summarised, including sex, age, job category and year sin the psychiatric field.<br><br>Missing values for each item in the ARTIC-35 were imputed using the multivariate imputation. Longitudinal data structure was considered using the predictive mean matching technique for two-level data. Twenty imputed data sets were generated with 10 iterations per imputation. For each of the imputed data sets, the following analyses were repeated: 1) the sum of the items on the ARTIC-35 for each participant were divided by the number of items, 2) means and standard deviations for the average scores for each time point were obtained, 3) mean differences and 95% confidence intervals for the average scores between time points were estimated.<br><br>Analyses were repeated using the complete case method. Using data from 56 participants in the analysis, the proportion of TIC implementation at the 3-month follow-up was calculated. |
| Prchal (2005)                                             | Implementing a new treatment philosophy in a                                                                           | Qualitative focus groups | To describe the process of                                                                                                                                       | North-eastern USA | January 2002 - March 2002 | No name                                                                                                       | All staff who worked in the Sanctuary                                                                                                                                                                                                                                                                                                                                            | Ten focus groups were conducted. Three involved clinicians and administrators/ supervisors (7-12 participants in each group)                                                                                                                                                                                                                                                                                                                                                                  | Qualitative  | A mid-range, inductive, coding scheme was used to analyse the qualitative focus group                                                                                                                                                                                                                                                                                                                                                                                                                                                                                                                                                                                                                                                                                                                                                                                                                                                                                                        |

|                                                                           |                                                                                                                       |                    |                                                                                                                                                                                                                                                        |                   |                                                                                       |                                                                                                                                          |                                                                                                                                                                    |                                                                                                                                                                                                                                                                                                                                                                                                                                     |             |                                                                                                                                                                                                                                                                                                                                                                                                          |
|---------------------------------------------------------------------------|-----------------------------------------------------------------------------------------------------------------------|--------------------|--------------------------------------------------------------------------------------------------------------------------------------------------------------------------------------------------------------------------------------------------------|-------------------|---------------------------------------------------------------------------------------|------------------------------------------------------------------------------------------------------------------------------------------|--------------------------------------------------------------------------------------------------------------------------------------------------------------------|-------------------------------------------------------------------------------------------------------------------------------------------------------------------------------------------------------------------------------------------------------------------------------------------------------------------------------------------------------------------------------------------------------------------------------------|-------------|----------------------------------------------------------------------------------------------------------------------------------------------------------------------------------------------------------------------------------------------------------------------------------------------------------------------------------------------------------------------------------------------------------|
| (70)                                                                      | residential treatment center for children with severe emotional disturbances: A qualitative study                     |                    | implementation of the Sanctuary Model of treatment in a residential treatment centre for youths with severe emotional disturbances, from the viewpoint of staff who volunteered to participate in focus groups about the model and its implementation. |                   |                                                                                       | Three residential, youth therapeutic services specialised to treat youths with conduct disorders and other serious emotional disturbance | Model units were invited to participate in focus groups.<br><br>Response rate: Not stated.                                                                         | and seven involved milieu counsellors (3-10 participants in each group).<br><br>Each group session was recorded, and the recordings were transcribed. Notes were taken and then compared with the transcripts. When participants did not consent to recording, extensive notes were taken and then typed by the transcriptionist.<br><br>All training on the Sanctuary Model took place prior to this initial implementation stage. |             | data, with some structure imposed by the research questions and overall goals of the study.<br><br>A multi-step approach to coding was used. The coding process was undertaken by the PI and a doctoral student. Consensus on finalised code definitions was reached through discussion between the PI and student.                                                                                      |
| Prytherch, Cooke & Marsh (2020)<br><br>(28)                               | Coercion or collaboration: service-user experiences of risk management in hospital and a trauma-informed crisis house | Qualitative        | To explore service-users' experiences of risk management in both hospital services and a trauma-informed crisis house                                                                                                                                  | North London, UK  | Not stated                                                                            | No name<br><br>A residential female crisis house                                                                                         | Five current residents were approached by crisis house staff, two of whom participated. Six previous residents volunteered to take part.<br><br>Response rate: 2/5 | Interviews took place at the crisis house and lasted approximately 1 hour. Participants were asked about their experiences in the crisis house and in hospital services. All interviews were audio-recorded. Pseudonyms were used to protect confidentiality.                                                                                                                                                                       | Qualitative | Thematic analysis within a critical realist framework was used.<br>Data was analysed iteratively. An inductive approach was used. Rather than aiming for "theoretical saturation," the findings are presented as one interpretation that is "far enough along to make a contribution to our evolving body of understandings."<br><br>The analysis was sent to all participants to validate the analysis. |
| Rivard, McCorkle, Duncan, Pasquale, Bloom & Abramovitz (2004)<br><br>(71) | Implementing a trauma recovery framework for youths in residential treatment                                          | Service evaluation | To describe an intervention designed to address the special needs of youths with histories of maltreatment                                                                                                                                             | North-eastern USA | The first round of focus groups was conducted during late January – early March 2002. | No name<br><br>Three residential youth therapeutic services (each composed of smaller residential                                        | N/A                                                                                                                                                                | The Sanctuary Model was first piloted in five residential units that self-selected to participate in the initial phase of the project. Following the pilot, four additional residential units were randomly assigned to implement the model. Eight other residential units, where the model was not being implemented, served as the usual services comparison.                                                                     | Qualitative | Focus groups were audiotaped, with permission of participants, and transcribed. Responses to each of the focus group questions were compiled across the groups. The aggregated responses to each question were then coded and displayed in matrices by major themes,                                                                                                                                     |

|                                                         |                                                                                                                                            |                                                                |                                                                                                                                                                                                               |                   |                                                                                                                                                                                                                                                 |                                                                                                                                                                                                      |                                                                                                                                                                                           |                                                                                                                                                                                                                                                                                                                                                                                                                                                                                                                                                                                                                                                                                                                                                                                                                                                                                                                                                                                                                                                                                                                                                                                                                                    |       |                                                                                                                                                                                                                                                                                                                                        |
|---------------------------------------------------------|--------------------------------------------------------------------------------------------------------------------------------------------|----------------------------------------------------------------|---------------------------------------------------------------------------------------------------------------------------------------------------------------------------------------------------------------|-------------------|-------------------------------------------------------------------------------------------------------------------------------------------------------------------------------------------------------------------------------------------------|------------------------------------------------------------------------------------------------------------------------------------------------------------------------------------------------------|-------------------------------------------------------------------------------------------------------------------------------------------------------------------------------------------|------------------------------------------------------------------------------------------------------------------------------------------------------------------------------------------------------------------------------------------------------------------------------------------------------------------------------------------------------------------------------------------------------------------------------------------------------------------------------------------------------------------------------------------------------------------------------------------------------------------------------------------------------------------------------------------------------------------------------------------------------------------------------------------------------------------------------------------------------------------------------------------------------------------------------------------------------------------------------------------------------------------------------------------------------------------------------------------------------------------------------------------------------------------------------------------------------------------------------------|-------|----------------------------------------------------------------------------------------------------------------------------------------------------------------------------------------------------------------------------------------------------------------------------------------------------------------------------------------|
|                                                         |                                                                                                                                            |                                                                | and exposure to family and community violence. To describe the main components of the evaluation, the evaluation design, and initial impressions of staff during the course of implementing the intervention. |                   |                                                                                                                                                                                                                                                 | units) specialised to treat youths with conduct disorders and other serious emotional disturbances                                                                                                   |                                                                                                                                                                                           | <p>A comparison group design (Sanctuary versus Standard Residential Services) with measurement at five points (baseline, 3, 6, 9, and 12 months) examined change in the two conditions.</p> <p>Several standardised instruments were used to measure changes in the therapeutic community environments and change in youths' functioning and behaviours. Change in the frequency of critical incidents (e.g., harm to self, others, or property) and use of physical restraints was measured by accessing and analysing data from the agency's management information system.</p> <p>Implementation adherence to the original model was measured through consultant's process notes, periodic review of a Sanctuary Model Milestones Checklist, and a Psychoeducation Group Fidelity Checklist.</p> <p>Perceptions of the course of implementation, and challenges in implementing the model were collected through focus groups, convened every 6 months. Ten clinician and administrator/supervisor focus groups were conducted (n=7-12 per group). Seven focus groups involved counsellors (n=3-10 per group). Participants were also asked about factors facilitating and inhibiting their ability to implement the model.</p> |       | categories, and sub-categories. The major themes that emerged across all focus groups were narratively described.                                                                                                                                                                                                                      |
| Rivard, Bloom, McCorkle, Abramovitz, (2005)<br><br>(72) | Preliminary results of a study examining the implementation and effects of a trauma recovery framework for youths in residential treatment | Non-randomised control design (with nested process evaluation) | To examine the implementation and short-term effects of the Sanctuary Model as incorporated into residential treatment programs for youth                                                                     | North-eastern USA | The Sanctuary Model was first piloted with four residential units. During this phase, the staff training protocol and manual was developed and piloted between February and August 2001.<br><br>Four additional residential units were randomly | No name<br><br>Three residential youth therapeutic services (each composed of smaller residential units) specialised to treat youths with conduct disorders and other serious emotional disturbances | Four units self-selected to participate in the initial phase of the project. Four additional residential treatment units were randomly assigned to implement the Sanctuary Model in 2001. | <p>The Sanctuary Model was first piloted in four residential units that self-selected to participate in the initial phase of the project. The staff training protocol and manual was developed and piloted between February-August 2001.</p> <p>Four additional residential treatment units were randomly assigned to implement the Sanctuary Model in autumn 2001. Eight other units, providing the standard residential treatment program, served as the usual services comparison group.</p> <p>Progress in implementing the model was documented through consultants' notes and periodic reviews of the Sanctuary Project Implementation Milestones checklist.</p>                                                                                                                                                                                                                                                                                                                                                                                                                                                                                                                                                             | Mixed | <p>A comparison group design, with measurement at three points (baseline, 3 months, 6 months), was used.</p> <p>Group differences in outcomes were explored using independent t-tests.</p> <p>Repeated measure analyses were used to assess differences over time and by group.</p> <p>Qualitative analysis method was not stated.</p> |



|                            |                                                                                                          |                                                                |                                                                                                                                                      |                      |                                                                                                                                 |                                                                                                           |                                                                                                                                                                                                                                                                                                                                                                                                      |                                                                                                                                                                                                                                                                                                                                                                                                                                                                                                                                                                                                                                                                                                                                 |             |                                                                                                                                                                                                                          |
|----------------------------|----------------------------------------------------------------------------------------------------------|----------------------------------------------------------------|------------------------------------------------------------------------------------------------------------------------------------------------------|----------------------|---------------------------------------------------------------------------------------------------------------------------------|-----------------------------------------------------------------------------------------------------------|------------------------------------------------------------------------------------------------------------------------------------------------------------------------------------------------------------------------------------------------------------------------------------------------------------------------------------------------------------------------------------------------------|---------------------------------------------------------------------------------------------------------------------------------------------------------------------------------------------------------------------------------------------------------------------------------------------------------------------------------------------------------------------------------------------------------------------------------------------------------------------------------------------------------------------------------------------------------------------------------------------------------------------------------------------------------------------------------------------------------------------------------|-------------|--------------------------------------------------------------------------------------------------------------------------------------------------------------------------------------------------------------------------|
|                            |                                                                                                          |                                                                |                                                                                                                                                      |                      | assigned to implement the Sanctuary Model in the fall of 2001.                                                                  |                                                                                                           | <p>The youth sample consisted of all youths for whom full informed written consent was obtained from custodial agencies, legal guardians, parents, and youths. The staff sample was composed of staff that worked in the programs and who voluntarily elected to participate in surveys and focus groups through a process of fully informed, written consent.</p> <p>Response rate: Not stated.</p> | <p>Qualitative data on staff perceptions of implementation, and challenges in implementing the model, were gathered through focus groups. The Community Oriented Programs Environment Scale was administered to staff four times at 4–6-month intervals.</p> <p>Youth demographics, historical data, history of abuse and neglect were abstracted from client records at baseline. Other measures of youth outcomes included: the Child Behaviour Checklist, the Trauma Symptom Checklist for Children, the Rosenberg Self Esteem Scale, the Nowicki-Strickland Locus of Control Scale, the peer form of the Inventory of Parent and Peer Attachment, the Youth Coping Index, and the Social Problem Solving Questionnaire.</p> |             |                                                                                                                                                                                                                          |
| Stamatopoulou, (2019) (73) | Transitioning to a trauma informed forensic unit: Staff perceptions of a shift in organisational culture | Qualitative evaluation of implementation of a TIC intervention | To provide a description of the impact of transitioning to a trauma-informed service model on staff working in an inpatient forensic unit in England | Northern England, UK | <p>Implementation of the TIC programme: February 2018</p> <p>Focus groups were conducted in January 2019 and February 2019.</p> | No name<br><br>Inpatient female forensic mental health unit (comprised of four wards ranging between low- | <p>The field supervisor made contact with the forensic unit.</p> <p>Response rate: Not stated.</p>                                                                                                                                                                                                                                                                                                   | <p>The researcher visited the unit in December 2018, after project approval. During this visit, locations, dates and times for the focus groups were agreed with the service. Paper copies of the participant information sheets were provided to interested staff and left in staff rooms and with the local contact for the researcher.</p> <p>An open-ended interview schedule was devised. The questions asked about the incorporation of choice, trust, empowerment</p>                                                                                                                                                                                                                                                    | Qualitative | <p>Focus group data was analysed using thematic analysis. Inductive analysis was applied.</p> <p>Data was coded through a social constructionist epistemology lens. Themes and subthemes were presented narratively.</p> |

|                              |                                                                                                            |                              |                                                                                                                                                                                                                                                           |                          |                          |                                                                                                                                           |                                                                                                                                                          |                                                                                                                                                                                                                                                                                                                                                                                                                                                                                                                                                                                                                                                                 |              |                                                                                                                                                                                                                                                                                                                                                                                                          |
|------------------------------|------------------------------------------------------------------------------------------------------------|------------------------------|-----------------------------------------------------------------------------------------------------------------------------------------------------------------------------------------------------------------------------------------------------------|--------------------------|--------------------------|-------------------------------------------------------------------------------------------------------------------------------------------|----------------------------------------------------------------------------------------------------------------------------------------------------------|-----------------------------------------------------------------------------------------------------------------------------------------------------------------------------------------------------------------------------------------------------------------------------------------------------------------------------------------------------------------------------------------------------------------------------------------------------------------------------------------------------------------------------------------------------------------------------------------------------------------------------------------------------------------|--------------|----------------------------------------------------------------------------------------------------------------------------------------------------------------------------------------------------------------------------------------------------------------------------------------------------------------------------------------------------------------------------------------------------------|
|                              |                                                                                                            |                              | and the factors that influence the progress of this transition                                                                                                                                                                                            |                          |                          | medium security)                                                                                                                          |                                                                                                                                                          | and safety within the programme of change. All interviews were recorded.<br><br>Data collection was conducted in four 45-90 minute focus groups (n=3-7 staff members). Two focus groups were conducted with senior staff members. Two focus groups were conducted with staff in lower pay grades. The researcher was available following the focus groups for debriefing.<br><br>Quality of the project was assessed using the Eight "Big-Tent" criteria for Excellent Qualitative research (Tracy, 2010).                                                                                                                                                      |              |                                                                                                                                                                                                                                                                                                                                                                                                          |
| Tompkins & Neale (2016) (74) | Delivering trauma-informed treatment in a women-only residential rehabilitation service: Qualitative study | In-depth case study approach | To explore factors that affect the delivery of trauma-informed treatment in one women-only residential rehabilitation service and to identify any challenges experienced by staff (in delivering the programme) and clients (in receiving the programme). | UK, region not specified | April 2015 - August 2015 | No name<br><br>A female residential substance use treatment unit                                                                          | Purposive sampling which aimed to encompass those likely to have varying experiences of the trauma-informed treatment.<br><br>Response rate: Not stated. | Thirty-seven semi-structured interviews were conducted.<br><br>Two researchers approached potential participants and provided them with study information. Participants volunteered to take part. Interviews were conducted in private. All interviews followed a topic guide that explored participants' personal circumstances and views and experiences of TIC. Staff were provided information on their experiences of delivering TIC, whilst clients were asked about their experiences of receiving it. Staff received no compensation for taking part; clients received a £10 high street gift card. All interviews were audio-recorded and transcribed. | Qualitative  | Data were analysed using iterative categorization, involving participants.<br><br>The two coding systems were developed by researchers. The authors revisited the coded data to identify patterns, similarities and differences within and between different participant groups. Emerging findings were refined following discussions between the authors, two of the key stakeholders, and peer review. |
| Zweben et al. (2015) (75)    | Enhancing family protective factors in residential treatment for substance use disorders                   | Pre-post study               | To compare outcomes for women and children on a trauma-informed dual diagnosis residential treatment program versus treatment as usual                                                                                                                    | Oakland, California, USA | Not specified            | Project Pride, East Bay Community Recovery Project<br><br>Residential treatment program for women who are pregnant or have young children | Residents at Project Pride who volunteered to participate in CF!<br><br>Response rate: N/A                                                               | The 'Celebrating Families!' (CF!) program was implemented. There were 44 women who participated, and 51 women who were in Project Pride but who did not take part.<br><br>Participants were assessed at baseline, discharge and 6-month follow-up.                                                                                                                                                                                                                                                                                                                                                                                                              | Quantitative | Quantitative outcomes were reported but no statistical analyses conducted.                                                                                                                                                                                                                                                                                                                               |

## Study characteristics

The models reported on most commonly were the Six Core Strategies (n=7) and the Sanctuary Model (n=6). Most included studies were based in the USA (n=23), followed by the UK (n=5), Australia (n=2), and Japan (n=1). Most studies were undertaken in acute services (n=16) and residential treatment services (n=14), while one was undertaken in an NHS crisis house. Over a third of studies were based in child, adolescent, or youth mental health settings (n=12), while six were based in women's only services. See Table 1 for full characteristics of all included studies.

Twenty-one studies gave no information about how they defined 'trauma' within their models. Of the ten studies that did provide a definition, four (56, 65, 73, 74) referred to definitions from a professional body (5, 76, 77); three studies (62, 68, 72) used definitions from peer-reviewed papers or academic texts (78-81); in two studies (55, 64), authors created their own definitions of trauma; and in one study (61), the trauma definition was derived from the TIC model manual. See full definitions in Table 2. Some studies reported details on participants' experiences of trauma, these are reported in Table 1.

### What trauma informed approaches are used in inpatient, crisis, emergency, and residential mental health care?

Thirty-one studies in twenty-seven different settings described the implementation of trauma-informed approaches at an organisational level in inpatient, crisis, emergency, and residential settings. The different models illustrate that the implementation of trauma informed approaches is a dynamic and evolving process which can be adapted for a variety of contexts and settings.

We have described the trauma informed approaches by model category and by setting. Child and adolescent only settings are reported separately. Summaries of the trauma informed approaches can be seen in Table 2. For full descriptions, see Appendix 3.

Table 2 Trauma informed models

| Author(s) and year  | Setting and country                                                                      | Name of model and aim/ purpose of intervention or service                                                                                                   | Trauma-informed model content (as described in the papers)                                                                                                                                                                                                                                                                                                                                                                                                                                                                                                                                                                                                                                                                                                                                                                                                                                                                                                                                                                                                                                                                                                                                                                                                                                                                                                                                                                                                                                                                                                                                                                                                                                                                                                                                                                                                                                                                                                                                                                                                                                                                                                                                                                                                                                                                                                                                                                                                                                                                                                                                                                                                                                                                                                                                                                                                                       | Who was the model designed by and who implemented it? | Definition of trauma within the trauma-informed model under investigation |
|---------------------|------------------------------------------------------------------------------------------|-------------------------------------------------------------------------------------------------------------------------------------------------------------|----------------------------------------------------------------------------------------------------------------------------------------------------------------------------------------------------------------------------------------------------------------------------------------------------------------------------------------------------------------------------------------------------------------------------------------------------------------------------------------------------------------------------------------------------------------------------------------------------------------------------------------------------------------------------------------------------------------------------------------------------------------------------------------------------------------------------------------------------------------------------------------------------------------------------------------------------------------------------------------------------------------------------------------------------------------------------------------------------------------------------------------------------------------------------------------------------------------------------------------------------------------------------------------------------------------------------------------------------------------------------------------------------------------------------------------------------------------------------------------------------------------------------------------------------------------------------------------------------------------------------------------------------------------------------------------------------------------------------------------------------------------------------------------------------------------------------------------------------------------------------------------------------------------------------------------------------------------------------------------------------------------------------------------------------------------------------------------------------------------------------------------------------------------------------------------------------------------------------------------------------------------------------------------------------------------------------------------------------------------------------------------------------------------------------------------------------------------------------------------------------------------------------------------------------------------------------------------------------------------------------------------------------------------------------------------------------------------------------------------------------------------------------------------------------------------------------------------------------------------------------------|-------------------------------------------------------|---------------------------------------------------------------------------|
| Six Core Strategies |                                                                                          |                                                                                                                                                             |                                                                                                                                                                                                                                                                                                                                                                                                                                                                                                                                                                                                                                                                                                                                                                                                                                                                                                                                                                                                                                                                                                                                                                                                                                                                                                                                                                                                                                                                                                                                                                                                                                                                                                                                                                                                                                                                                                                                                                                                                                                                                                                                                                                                                                                                                                                                                                                                                                                                                                                                                                                                                                                                                                                                                                                                                                                                                  |                                                       |                                                                           |
| Azeem et al. (2011) | Mixed- and single-gender child and adolescent (ages 6-17) Psychiatric unit Hospital, USA | No name assigned<br><br>Aim to reduce seclusions and restraints among youth during psychiatric hospitalisation based on six trauma informed core principles | <p>The hospital received training by the National Association of State Mental Health Program Directors (NASMHPD) regarding Six Core Strategies to be implemented in reducing restraints and seclusions in the unit. The strategies are based on trauma-informed and strength-based care, with the focus on primary prevention principles, and include:</p> <p><u>Leadership towards organisational change strategies:</u> Senior management created a goal of reducing seclusion and restraint. The vision was shared with all the staff in different meetings and communications. The reasons for this goal were shared, including avoiding traumatisation and re-traumatisation of the patients and staff, decreasing injuries, enhancing best practices, and ultimately improving treatment outcomes and staff morale.</p> <p><u>Use of data to inform practice:</u> Data which were collected and analysed regarding seclusions and restraints included age, gender, ethnicity, date of admission, psychiatric diagnosis, unit, time of the shift, staff involved, injuries to the patient and staff. The data were shared in all staff meetings, regularly with clinical teams, and were posted on the respective units monthly.</p> <p><u>Workforce development:</u> The hospital created a treatment environment that was based on Trauma Informed Care, facilitates recovery, and was inclusive through development of staff education and training. The staff was educated during orientation as new employees, and regularly regarding neurological, biological, psychological, and social effects of trauma, and the prevalence of these experiences in patients receiving mental health services.</p> <p><u>Use of restraint and seclusion reduction tools:</u> A variety of tools and assessments were included in the individual treatment plans. The staff at the hospital was retrained in utilising preventative measures prior to the use of restraints and seclusions.</p> <p><u>Improve consumer's role:</u> Staff members were educated regarding the importance of patient and family involvement in safety plans and setting individual goals. The patients, families, family advocates, and case workers were encouraged and welcomed in the treatment meetings and evaluation conferences. Regular surveys involving the children and adolescents, families, and case workers were initiated.</p> <p><u>Debriefing techniques:</u> Various debriefing activities were initiated, including immediate post-event debriefing and formal debriefing. The debriefings included staff members and patients involved. Immediate debriefing looked at emotional support needed for the patient and staff involved and any immediate changes required in the treatment plan. The formal debriefing looked at the incident in a root cause analysis fashion.</p> | Not specified                                         | Not specified                                                             |

|                     |                                                                                                          |                                                                                                                                                              |                                                                                                                                                                                                                                                                                                                                                                                                                                                                                                                                                                                                                                                                                                                                                                                                                                                                                                                                                                                                                                                                                                                                                                                                                                                                                                                                                                                                                                                                                                                                                                                                                                                                                                                                                                                                                                                                                                                                                                                                                                                                                                                                                                                                                                                                                                                                                                                                                                                                                                                                                                                                                                                                                                                                                 |                                                                                                                                                |               |
|---------------------|----------------------------------------------------------------------------------------------------------|--------------------------------------------------------------------------------------------------------------------------------------------------------------|-------------------------------------------------------------------------------------------------------------------------------------------------------------------------------------------------------------------------------------------------------------------------------------------------------------------------------------------------------------------------------------------------------------------------------------------------------------------------------------------------------------------------------------------------------------------------------------------------------------------------------------------------------------------------------------------------------------------------------------------------------------------------------------------------------------------------------------------------------------------------------------------------------------------------------------------------------------------------------------------------------------------------------------------------------------------------------------------------------------------------------------------------------------------------------------------------------------------------------------------------------------------------------------------------------------------------------------------------------------------------------------------------------------------------------------------------------------------------------------------------------------------------------------------------------------------------------------------------------------------------------------------------------------------------------------------------------------------------------------------------------------------------------------------------------------------------------------------------------------------------------------------------------------------------------------------------------------------------------------------------------------------------------------------------------------------------------------------------------------------------------------------------------------------------------------------------------------------------------------------------------------------------------------------------------------------------------------------------------------------------------------------------------------------------------------------------------------------------------------------------------------------------------------------------------------------------------------------------------------------------------------------------------------------------------------------------------------------------------------------------|------------------------------------------------------------------------------------------------------------------------------------------------|---------------|
| Azeem et al. (2015) | Mixed- and single-gender child and adolescent (ages 6-17) Psychiatric unit Hospital, USA                 | <p>No name assigned</p> <p>Aim to reduce restraint in a paediatric hospital by the implementation of a trauma informed and strength-based care approach.</p> | <p>This model was based on the Six Core Strategies.</p> <p>Hospital executive leaders were available to the treatment units to assist in operationalising the tenets of optimal care, and for the provision of support and consultation for complex situations. The hospital encouraged use of verbal de-escalation techniques to intervene and support youth with unsafe behaviours. All staff were offered training and education on trauma-informed care with emphasis on use of verbal de-escalation techniques early in the crisis cycle.</p> <p>Restraints were used as a last resort when there was imminent risk to the youth or others. The topic of restraint reduction and prevention was a standing agenda item in executive meetings and regularly discussed in Executive and Leadership team meetings. The Medical Director, Director of Nursing, and Director of Operations reviewed every restraint the day after.</p> <p>Staff surveys were used to monitor staff satisfaction and training needs. "ASAP (Assaulted Staff Action Plan) Team" was created which provided immediate peer support for traumatised staff. Team building activities, health education opportunities, and yoga groups were also scheduled on a regular basis to keep focus on the health of staff a priority.</p> <p>An individualised treatment plan was developed comprised of individualised goals, target behaviours, triggers, early warning signs, coping tools, and safety plans. Open communication between childcare staff and clinical staff was the key to implementation of treatment plans and problems incurred.</p> <p>Families were welcomed to the hospital before arrival of a youth to tour the facility, meet staff, and familiarise themselves with the principles of care and programming. Child service, nursing, and clinical staff volunteers who were particularly skilled at conflict resolution and de-escalation of adolescent youths were dispatched as necessary to situations which were heading toward a pattern of conflicts or when youths themselves wanted to be seen by a member of the team. Many families were reimbursed for gasoline used to travel to family meetings, or medical cabs were accessed. Visitation by families has been encouraged and accommodated most hours of the day. There have been monthly family dinners to build closer relationships with staff at the hospital.</p> <p>Debriefing activities were undertaken, the first step was an immediate response to gather details of the event, check for injuries or trauma, and manage milieu. Followed by a formal, rigorous problem solving and planning meeting held within a few days for some of the most complex situations.</p> | <p>Designed by: not specified</p> <p>Implemented by: not stated further than the psychiatric hospital</p>                                      | Not specified |
| Duxbury (2019)      | 11 mixed-gender and 3 single-gender adult, acute mental health wards from seven mental health hospitals, | <p>Name: "REsTRAIN Yourself"</p> <p>Aim to reduce dependence on physical restraint as a means of risk</p>                                                    | <p>"REsTRAIN Yourself" is based off The Six Core Strategies approach, adapted for the U.K. context. The 'Six Core Strategies' for minimising seclusion and restraint is a multilevel complex intervention targeting both organisational and individual factors in decision-making about care in acute mental health services.</p> <p>REsTRAIN Yourself operationalises core strategies through a number of specific interventions targeted for a UK context as follows: (1) setting team goals for the reduction of restraint; (2)</p>                                                                                                                                                                                                                                                                                                                                                                                                                                                                                                                                                                                                                                                                                                                                                                                                                                                                                                                                                                                                                                                                                                                                                                                                                                                                                                                                                                                                                                                                                                                                                                                                                                                                                                                                                                                                                                                                                                                                                                                                                                                                                                                                                                                                          | <p>Designed by: the Six Core Strategies approach was adapted to design REsTRAIN YOURSELF based on extensive consultation with stakeholders</p> | Not specified |

|                 |                                                   |                                                                |                                                                                                                                                                                                                                                                                                                                                                                                                                                                                                                                                                                                                                                                                                                                                                                                                                                                                                                                                                                                                                                                   |                                                                                                                                                                                                                                                                                                                                              |                                                                                                                                                                                                                                                                                                                                                                                                                                       |
|-----------------|---------------------------------------------------|----------------------------------------------------------------|-------------------------------------------------------------------------------------------------------------------------------------------------------------------------------------------------------------------------------------------------------------------------------------------------------------------------------------------------------------------------------------------------------------------------------------------------------------------------------------------------------------------------------------------------------------------------------------------------------------------------------------------------------------------------------------------------------------------------------------------------------------------------------------------------------------------------------------------------------------------------------------------------------------------------------------------------------------------------------------------------------------------------------------------------------------------|----------------------------------------------------------------------------------------------------------------------------------------------------------------------------------------------------------------------------------------------------------------------------------------------------------------------------------------------|---------------------------------------------------------------------------------------------------------------------------------------------------------------------------------------------------------------------------------------------------------------------------------------------------------------------------------------------------------------------------------------------------------------------------------------|
|                 | North-west England, UK                            | management in acute mental health wards.                       | <p>reflecting upon the use of restraint and personal communication styles (through reporting and analysing every restraint incident over a period of time); (3) using approaches to help patients and staff ascertain needs and challenges with regards to aggression on the ward; (4) employing partnership working strategies to reduce restraint such as ‘advance directives’ (my safety plan), and positive verbal and non-verbal communication; (5) exploring environmental challenges to make appropriate changes (both physical and procedural); and (6) debriefing following incidents or near misses of restraint.</p> <p>A dedicated improvement advisor worked on the wards 1-day per week to support implementation of the model by: (1) identifying potential change ideas with staff; (2) the exploration of ideas and changes that teams would test using improvement science methods (i.e., Plan, Do, See, Act cycles); (3) Identification of group and individual roles and ownership whereby each member of the group commits to an action.</p> | Implemented by: A dedicated improvement adviser worked on the wards one day a week to support the implementation of the approach. Local steering groups were set up to progress ongoing spread and sustainability. The approach focused on identified champions for each ward and attendance at action learning sessions on a monthly basis. |                                                                                                                                                                                                                                                                                                                                                                                                                                       |
| Chandler (2008) | An inpatient psychiatric unit, Massachusetts, USA | No name assigned<br><br>Aim of the TIC intervention not stated | <p>The model was based on Six Core Strategies. Staff members— including nurses, physicians, social workers, and mental health counsellors—were educated on adopting and implementing the trauma-informed philosophy. Staff were taught to start with the skills that the patients have and so build on their strengths.</p> <p>Cognitive-behavioural therapy and dialectical-behavioural skill training was offered daily.</p> <p>A resource room was made available, with literature on diagnosis and coping skills, as well as written exercises, and with videos and audiotapes to assist patients in managing symptoms.</p>                                                                                                                                                                                                                                                                                                                                                                                                                                   | Not specified                                                                                                                                                                                                                                                                                                                                | Trauma is prolonged persistent and may originate in childhood. It results in fear, mistrust, depression, limited relational capacity, and negative coping behaviours, such as self-harm, dissociative behaviour, and aggression. Trauma can precipitate neurobiological changes such that the act of entering new and familiar situations can be interpreted as being threatening and fearful as a result of the tyranny of the past. |
| Chandler (2012) | An inpatient psychiatric unit, Massachusetts, USA | No name assigned<br><br>Aim to reduce restraint and seclusion. | The unit leadership provided an opportunity for a group of administrators and staff to participate in SAMHSA’s National Center for Trauma-Informed Care training. Following the training, leadership and staff committed to reducing restraint and seclusion use by building on the Six Core Strategies (National Association of State Mental Health Program Directors, 2009) and adopting a trauma-informed care approach. To involve all staff, a retreat, followed by a series of mandated workshops on trauma-informed care, were created that included education on the neurobiological and psychosocial effects of trauma, the relationship of dissociative symptoms and self-harm to                                                                                                                                                                                                                                                                                                                                                                       | Not specified                                                                                                                                                                                                                                                                                                                                | The paper states that “a traumatic event is defined as when an individual has experienced, witnessed, or is confronted with an event that involved actual or threatened death,                                                                                                                                                                                                                                                        |

|             |                                                                                                    |                                                                                                                                                                                                                                                                                                                         |                                                                                                                                                                                                                                                                                                                                                                                                                                                                                                                                                                                                                                                                                                                                                                                                                                                                                                                                                                                                                                                                                                                                                                                                                                                                                                                                                                                                                                                                                                                                                                                                                                                                                                                                                                                                                                                                                                                                                                                                                                                                                                                                                                                                                                                                                                                                                                                                                                                                                                                                                                                                                                                                                                                                               |                                                                                                                                                                                                                                                                                                                                                                                                                                                                                                                                                                        |                                                                                                                                                                                                                                                                         |
|-------------|----------------------------------------------------------------------------------------------------|-------------------------------------------------------------------------------------------------------------------------------------------------------------------------------------------------------------------------------------------------------------------------------------------------------------------------|-----------------------------------------------------------------------------------------------------------------------------------------------------------------------------------------------------------------------------------------------------------------------------------------------------------------------------------------------------------------------------------------------------------------------------------------------------------------------------------------------------------------------------------------------------------------------------------------------------------------------------------------------------------------------------------------------------------------------------------------------------------------------------------------------------------------------------------------------------------------------------------------------------------------------------------------------------------------------------------------------------------------------------------------------------------------------------------------------------------------------------------------------------------------------------------------------------------------------------------------------------------------------------------------------------------------------------------------------------------------------------------------------------------------------------------------------------------------------------------------------------------------------------------------------------------------------------------------------------------------------------------------------------------------------------------------------------------------------------------------------------------------------------------------------------------------------------------------------------------------------------------------------------------------------------------------------------------------------------------------------------------------------------------------------------------------------------------------------------------------------------------------------------------------------------------------------------------------------------------------------------------------------------------------------------------------------------------------------------------------------------------------------------------------------------------------------------------------------------------------------------------------------------------------------------------------------------------------------------------------------------------------------------------------------------------------------------------------------------------------------|------------------------------------------------------------------------------------------------------------------------------------------------------------------------------------------------------------------------------------------------------------------------------------------------------------------------------------------------------------------------------------------------------------------------------------------------------------------------------------------------------------------------------------------------------------------------|-------------------------------------------------------------------------------------------------------------------------------------------------------------------------------------------------------------------------------------------------------------------------|
|             |                                                                                                    |                                                                                                                                                                                                                                                                                                                         | <p>posttraumatic stress disorder (PTSD), and the re-traumatisation that occurs from being restrained or witnessing use of restraints and seclusion.</p> <p>Cognitive-behavioural therapy and dialectical-behavioural skill training was offered daily.</p> <p>A resource room was made available, with literature on diagnosis and coping skills, as well as written exercises, and with videos and audiotapes to assist patients in managing symptoms.</p>                                                                                                                                                                                                                                                                                                                                                                                                                                                                                                                                                                                                                                                                                                                                                                                                                                                                                                                                                                                                                                                                                                                                                                                                                                                                                                                                                                                                                                                                                                                                                                                                                                                                                                                                                                                                                                                                                                                                                                                                                                                                                                                                                                                                                                                                                   |                                                                                                                                                                                                                                                                                                                                                                                                                                                                                                                                                                        | <p>serious injury, or threat that causes intense distress (American Psychiatric Association, 2000). Trauma that results in mental health problems is often repeated, prolonged, and severe, extending over time (van der Kolk, 2006)."</p>                              |
| Hale (2019) | <p>Child and adolescent (ages 3-17 years) inpatient behavioural health hospital, Illinois, USA</p> | <p>No name assigned</p> <p>The aim of this project initiative was to implement a TIC programme to decrease physical hold and seclusion rates, thus decreasing a patient's risk of being re-traumatised, decreasing injuries, enhancing best practices and ultimately improving treatment outcomes and staff morale.</p> | <p>The TIC programme was based on the Six Core Strategies established by the National Association of Mental Health Program Directors (NAMHPD). Nursing and therapy staff attended educational sessions about the six core principles, occurring weekly over the course of three weeks. Each session was delivered by the researcher (a psychiatric nurse) to ensure consistency. Handouts explaining the six core strategies were also provided to dietary, admission and recreational staff. The content of the intervention and changes made are summarised below.</p> <p><u>Leadership committed to organisational change:</u> The physical hold and seclusion strategy was updated to ensure the Administrator on Call (AOC) was informed of all crisis interventions within a reasonable time frame, enabling leadership to then debrief promptly about the incident and relevant paperwork to be completed. The following day, the AOC would follow-up with the treatment team.</p> <p><u>Using data to inform practice:</u> Data were collected daily and aggregated and graphed to compare crisis interventions by floor, day of the week, and time of use in a day. Data regarding seclusion and restraint use was made available to staff and patients.</p> <p><u>Workforce development:</u> TIC was incorporated into orientations for new staff. Mandated annual education for all staff about seclusion and restraint was also introduced. Staff were also required to attend an annual refresher at the Crisis Prevention Institution highlighting de-escalation techniques. TIC was also added to all staff job descriptions and annual evaluations.</p> <p><u>Use of seclusion and restraint prevention tools:</u> Assessment tools used on admission were revised to include trauma and aggression histories, and intake therapists were required to assess for trauma to help identify patients at-risk of aggression. Nurses assessed patients' current coping mechanisms, current and past triggers which could lead to aggressive behaviours and signs a patient may be approaching a crisis.</p> <p><u>Consumer of child/family and advocate roles in inpatient settings:</u> The hospital had a patient advocate on site five days a week to respond to all complaints, issues, or patient/parent concerns. The advocate provided support services for the patient, family, and hospital. A milieu coordinator role was also created, to provide extra support for patients, families, and staff.</p> <p><u>Debriefing techniques:</u> Debriefings were conducted immediately after a physical hold or seclusion occurred by the charge nurse or at the end of the shift by the AOC. A more formalised briefing in</p> | <p>Designed by:</p> <p>The project was based on the six core strategies developed by the National Association of Mental Health Program Directors (NASMHPD).</p> <p>Implemented by:</p> <p>The TIC programme was implemented by staff at the service, including leadership staff, the Administrator on Call, the Chief Operating Officer. The researcher was involved in implementation (a psychiatric nurse with 24 years of experience in the field, and who is part of the hospital's leadership team and restraint and seclusion performance improvement team).</p> | <p>Incidents that are perceived as terrifying, shocking, and sudden, or create a threat to someone's safety. Examples of traumatic events include but are not limited to all forms of abuse, neglect, war, abandonment, and natural disasters (Black et al., 2012).</p> |

|                         |                                                                                  |                                                                                                       |                                                                                                                                                                                                                                                                                                                                                                                                                                                                                                                                                                                                                                                                                                                                                                                                                                                                                                                                                                                                                                                                                                                                                                                                                                                                                                                                                                                                                                                                                                                                                                                                                                                                                                                                                                                                                                                                                                                                                                                                                                                                                                                                                                                                                                                                                                                                                                                                                                                                                                                                                                                                                                                                                                                                                                                                                                                                                            |                                                                                                                                                                                                                                                                                                                                                                                                                                                                                                                                                                                                                                                                                                                       |               |
|-------------------------|----------------------------------------------------------------------------------|-------------------------------------------------------------------------------------------------------|--------------------------------------------------------------------------------------------------------------------------------------------------------------------------------------------------------------------------------------------------------------------------------------------------------------------------------------------------------------------------------------------------------------------------------------------------------------------------------------------------------------------------------------------------------------------------------------------------------------------------------------------------------------------------------------------------------------------------------------------------------------------------------------------------------------------------------------------------------------------------------------------------------------------------------------------------------------------------------------------------------------------------------------------------------------------------------------------------------------------------------------------------------------------------------------------------------------------------------------------------------------------------------------------------------------------------------------------------------------------------------------------------------------------------------------------------------------------------------------------------------------------------------------------------------------------------------------------------------------------------------------------------------------------------------------------------------------------------------------------------------------------------------------------------------------------------------------------------------------------------------------------------------------------------------------------------------------------------------------------------------------------------------------------------------------------------------------------------------------------------------------------------------------------------------------------------------------------------------------------------------------------------------------------------------------------------------------------------------------------------------------------------------------------------------------------------------------------------------------------------------------------------------------------------------------------------------------------------------------------------------------------------------------------------------------------------------------------------------------------------------------------------------------------------------------------------------------------------------------------------------------------|-----------------------------------------------------------------------------------------------------------------------------------------------------------------------------------------------------------------------------------------------------------------------------------------------------------------------------------------------------------------------------------------------------------------------------------------------------------------------------------------------------------------------------------------------------------------------------------------------------------------------------------------------------------------------------------------------------------------------|---------------|
|                         |                                                                                  |                                                                                                       | which camera footage of the incident was reviewed was also done within a few days with the clinical team.                                                                                                                                                                                                                                                                                                                                                                                                                                                                                                                                                                                                                                                                                                                                                                                                                                                                                                                                                                                                                                                                                                                                                                                                                                                                                                                                                                                                                                                                                                                                                                                                                                                                                                                                                                                                                                                                                                                                                                                                                                                                                                                                                                                                                                                                                                                                                                                                                                                                                                                                                                                                                                                                                                                                                                                  |                                                                                                                                                                                                                                                                                                                                                                                                                                                                                                                                                                                                                                                                                                                       |               |
| Hale et al. (2020)      | A child and adolescent (ages 4-17 years) psychiatric hospital, USA               | No name assigned<br><br>Aim to reduce use of seclusion and restraint, and to avoid re-traumatisation. | <p>The trauma-informed approaches used included: (1) staff education, (2) staff use of de-escalation techniques, (3) completed needed administrative updates, (4) enhanced communication, (5) patient education, and (6) culture change.</p> <p><u>Staff education:</u> Education to reflect the trauma-informed philosophy and expected outcomes were given to new and seasoned staff; this was reiterated during annual competencies for all employees. Group therapy personnel were also updated to include trauma awareness and education, which included self-awareness and mindfulness techniques. Debriefings were a crucial aspect of staff education that moved the information into practice.</p> <p><u>Use of de-escalation as a tool to reduce seclusion and restraint use:</u> De-escalation techniques that were included in the educational intervention provided to employees and used as needed by staff included: communicating caring with empathy in a calm manner; intentional use of body language that was nonthreatening, and approaching the patient one-to-one (as opposed to multiple people hovering nearby); listening, and responding, to the expressed needs of the patient; and setting clear limits that were simple.</p> <p><u>Administrative updates, policies, and procedures:</u> Related to the use of physical holds and seclusions were updated to reflect the processes and expected outcomes of infusion of TIC philosophy. Job descriptions were updated to include requirements to use TIC whenever appropriate; employees were held to these standards during their annual performance appraisals.</p> <p><u>Enhanced communication:</u> Along with debriefings, as care unfolded, if a particular patient would require three or more of the following interventions (a PRN medication for aggressive behaviours, physical hold, and or seclusion within 3 days), this would trigger a multidisciplinary discussion of the overall plan of care for the patient.</p> <p><u>Change in the culture of care:</u> Implementing a TIC program did not eliminate the need for crisis interventions. Once each staff member was educated in the philosophy and practical approaches used when implementing TIC, the culture for utilising physical hold and seclusions gradually changed. Staff went from quickly utilising a crisis intervention to avoiding these approaches until all other recommended TIC interventions had been exhausted. Staff began using TIC language and approaches consistently during crisis incidents, using de-escalation, and debriefings; these, in turn, illuminated the emerging trauma-informed culture. It took several months to see the change. However, as employees saw the results of their changed culture, there was more and more consistent use of TIC interventions, until this became the norm.</p> | The Restraint and Seclusion Performance Improvement Team (R&S-PIT) was charged to design, implement and evaluate the change, based on the literature review, the clinicians' experiences and patient preferences. The R&S-PIT was formed with clinical experts, frontline workers (including the Chief Nursing Officer of the faculty), the Chief Executive Officer, the Chief Operating Officer, director of social work, nurse managers from each of the three floors, the staff educator, occupational therapist, and the Milieu Coordinator. Staff caregivers were always welcome and invited to every meeting. The R&S-PIT met monthly to review data and effectiveness of the interventions as they rolled out. | Not specified |
| The Sanctuary Model     |                                                                                  |                                                                                                       |                                                                                                                                                                                                                                                                                                                                                                                                                                                                                                                                                                                                                                                                                                                                                                                                                                                                                                                                                                                                                                                                                                                                                                                                                                                                                                                                                                                                                                                                                                                                                                                                                                                                                                                                                                                                                                                                                                                                                                                                                                                                                                                                                                                                                                                                                                                                                                                                                                                                                                                                                                                                                                                                                                                                                                                                                                                                                            |                                                                                                                                                                                                                                                                                                                                                                                                                                                                                                                                                                                                                                                                                                                       |               |
| Farragher et al. (2005) | Residential mixed-gender youth treatment unit for children with severe emotional | Name: The Sanctuary Model<br><br>Aim to reshape their programme to make                               | <p>Implementation involved five main components:</p> <p><u>Integration:</u> Integration refers to the concept of creating a unified and healthy organisation in which all members are active participants in decision-making, and all accept responsibility for each other's well-being and safety. One of the tasks of the Core Team was to train the staff in trauma theory and to teach them a common language. The crux of this language is the SELF Model</p>                                                                                                                                                                                                                                                                                                                                                                                                                                                                                                                                                                                                                                                                                                                                                                                                                                                                                                                                                                                                                                                                                                                                                                                                                                                                                                                                                                                                                                                                                                                                                                                                                                                                                                                                                                                                                                                                                                                                                                                                                                                                                                                                                                                                                                                                                                                                                                                                                         | Designed by: the Sanctuary model was originally designed by Dr Sandra Bloom (and team) in 1997.                                                                                                                                                                                                                                                                                                                                                                                                                                                                                                                                                                                                                       | Not stated.   |



|                          |                                                                                            |                                                                                                                                                                     |                                                                                                                                                                                                                                                                                                                                                                                                                                                                                                                                                                                                                                                                                                                                                                                                                                                                                                                                                                                                                                                                                                                                                                                                                                                                                                                                                                                                                                                                                                                                                                                                                                                                                                                                                                                                                                                                                                                                                                                                                                                                                                                                                                                                                                                        |                                                                                                                                                                                                                                                                                                                                                                                                                                                                                                                                                                                                                                                                                        |             |
|--------------------------|--------------------------------------------------------------------------------------------|---------------------------------------------------------------------------------------------------------------------------------------------------------------------|--------------------------------------------------------------------------------------------------------------------------------------------------------------------------------------------------------------------------------------------------------------------------------------------------------------------------------------------------------------------------------------------------------------------------------------------------------------------------------------------------------------------------------------------------------------------------------------------------------------------------------------------------------------------------------------------------------------------------------------------------------------------------------------------------------------------------------------------------------------------------------------------------------------------------------------------------------------------------------------------------------------------------------------------------------------------------------------------------------------------------------------------------------------------------------------------------------------------------------------------------------------------------------------------------------------------------------------------------------------------------------------------------------------------------------------------------------------------------------------------------------------------------------------------------------------------------------------------------------------------------------------------------------------------------------------------------------------------------------------------------------------------------------------------------------------------------------------------------------------------------------------------------------------------------------------------------------------------------------------------------------------------------------------------------------------------------------------------------------------------------------------------------------------------------------------------------------------------------------------------------------|----------------------------------------------------------------------------------------------------------------------------------------------------------------------------------------------------------------------------------------------------------------------------------------------------------------------------------------------------------------------------------------------------------------------------------------------------------------------------------------------------------------------------------------------------------------------------------------------------------------------------------------------------------------------------------------|-------------|
|                          | problems, New York, USA                                                                    | the service a better community for all members, including service users and staff. Also, to recommit to their treatment centre mission of helping children recover. | (Foderaro and Ryan 2000; Foderaro 2001).<br><u>Understanding trauma:</u> In order to effectively use the language and begin the work on safety, emotional management, loss and future with the children, the staff needed to have a basic understanding of how traumatic experiences disrupt normal coping and functioning in individuals and systems.<br><u>Avoiding re-enactment:</u> Staff training included teaching about the traumatised person's tendency to re-enact the trauma and to re-enact traumatic relationships. Part of the work done in the trainings was to help staff identify and break through their assumptions about each other and begin to build trusting, supportive relationships.<br><u>Fighting rigidity:</u> In a trauma-driven organisation, responses are rote and reactive, and planning is minimal. In a trauma-sensitive culture, responses to problems are explored and evolve through a more democratic system of shared decision-making.<br><u>Embracing non-violence:</u> In a trauma-sensitive culture, the staff and children use their understanding of trauma and its impact to make conscious choices to avoid violence.                                                                                                                                                                                                                                                                                                                                                                                                                                                                                                                                                                                                                                                                                                                                                                                                                                                                                                                                                                                                                                                                                  | Implemented by: the service was implemented with Dr Bloom's consultation.                                                                                                                                                                                                                                                                                                                                                                                                                                                                                                                                                                                                              |             |
| Korchmaros et al. (2021) | A mixed-gender adolescent residential substance misuse treatment agency, South-western USA | Name: The Sanctuary Model and Seeking Safety<br><br>Aim to meet the special needs of youth with histories of maltreatment and exposure to violence.                 | <u>The Sanctuary Model:</u> The Sanctuary Model is a milieu-wide, comprehensive program model that is intended to impact all aspects of a residential care agency (James, Thompson, & Ringle, 2017). The Sanctuary Model strives to reorganise systems and change organisational culture to shift away from an atmosphere of recurrent or constant crisis.<br><u>Seeking Safety:</u> Seeking Safety is a client-specific intervention intended to address trauma as a client-level problem (James et al., 2017). Seeking Safety prioritises five core principles: personal safety as a priority; integrated treatment for trauma and substance use-related disorders; focus on client's needs; attention to the therapeutic process; and focus on cognitions, behaviours, interpersonal interactions, and case management.<br><br>Implementation of the models:<br><u>The Sanctuary Model:</u> During the first 4 months, six treatment agency staff attended The Sanctuary Model five-day national training. Upon their return, these staff became a Steering Committee with the goal of embedding The Sanctuary Model within the treatment agency. In month six, the Steering Committee began training a Core Team and provided six four-hour trainings over a 6-month time frame. The Core Team's goal was to become immersed in The Sanctuary Model principles and to share their training and understanding with co-workers through enacting The Sanctuary Model in their daily work. For the first year of implementation, the Steering Committee and Core Team met twice a month and then met on a monthly basis for another year to discuss successes and challenges related to implementing The Sanctuary Model.<br><u>Seeking Safety:</u> The agency purchased Seeking Safety materials and the clinical director provided a one-day Seeking Safety training to six clinical staff (i.e., therapists; behavioural health staff; clinical supervisor). Seeking Safety training was directed only to those who would be implementing or supervising the client-specific groups. The agency provided additional support to clinical staff facilitating Seeking Safety to supplement their training once they began implementing Seeking Safety. | The Sanctuary Model:<br>Designed by: the Sanctuary model was originally designed by Dr Sandra Bloom (and team) in 1997.<br>Implemented by: six treatment agency staff attended the training and became a Steering Committee. They trained a Core Team comprising 19 staff in diverse agency roles. The Core Team's goal was to share their training and understanding of The Sanctuary Model in their daily work. In this way, all staff were involved in implementation.<br><br>Seeking safety:<br>Designed by: the Seeking Safety model was originally designed by Lisa M. Najavits in 2002.<br>Implemented by: six clinical staff were trained in Seeking Safety. These people were | Not stated. |

|               |                                                                                                                    |                                                                                                                                                                                                                                                                                                                                                 |                                                                                                                                                                                                                                                                                                                                                                                                                                                                                                                                                                                                                                                                                                                                                                                                                                                                                                                                                                                                                                                                                                                                                              |                                                                                                                                                                                         |                                                                                                                                                                                                                                                                                                                                                                                                                                                                                                                                                                                                                                                                                                                       |
|---------------|--------------------------------------------------------------------------------------------------------------------|-------------------------------------------------------------------------------------------------------------------------------------------------------------------------------------------------------------------------------------------------------------------------------------------------------------------------------------------------|--------------------------------------------------------------------------------------------------------------------------------------------------------------------------------------------------------------------------------------------------------------------------------------------------------------------------------------------------------------------------------------------------------------------------------------------------------------------------------------------------------------------------------------------------------------------------------------------------------------------------------------------------------------------------------------------------------------------------------------------------------------------------------------------------------------------------------------------------------------------------------------------------------------------------------------------------------------------------------------------------------------------------------------------------------------------------------------------------------------------------------------------------------------|-----------------------------------------------------------------------------------------------------------------------------------------------------------------------------------------|-----------------------------------------------------------------------------------------------------------------------------------------------------------------------------------------------------------------------------------------------------------------------------------------------------------------------------------------------------------------------------------------------------------------------------------------------------------------------------------------------------------------------------------------------------------------------------------------------------------------------------------------------------------------------------------------------------------------------|
|               |                                                                                                                    |                                                                                                                                                                                                                                                                                                                                                 | The agency began agency-wide implementation of The Sanctuary Model and the group sessions of Seeking Safety during month four.                                                                                                                                                                                                                                                                                                                                                                                                                                                                                                                                                                                                                                                                                                                                                                                                                                                                                                                                                                                                                               | responsible for implementing or supervising the client-specific groups.                                                                                                                 |                                                                                                                                                                                                                                                                                                                                                                                                                                                                                                                                                                                                                                                                                                                       |
| Kramer (2016) | Forensic male adolescent residential treatment unit, USA                                                           | <p>Name: The Sanctuary Model</p> <p>Aim to become a trauma-informed milieu committed to a theoretical and organisational framework that primarily would improve outcomes for the residents placed there by the juvenile courts. The Sanctuary Model aims to promote healing and sustain human growth, learning and health, and instil hope.</p> | <p>The Sanctuary model is a trauma-focused, therapeutic community-based theoretical and treatment model. It is composed of two primary components that lead to change: the creation and maintenance of a non-violent, democratic, therapeutic community; and psycho-educational exercises and modules to increase self-awareness and insight.</p> <p>Within the Sanctuary Model, the SELF model is a psycho-educational construct that educates around four stages of recovery: safety; emotional intelligence; loss; and future plans. The curriculum includes 12 hours of training for staff each year and psycho-educational groups for residents three to four times a year at this facility.</p> <p>Components of the Sanctuary model that effect change include creation of a safe community; the SELF model; psychoeducation; the Sanctuary commitments (non-violence, emotional intelligence, social learning and social responsibility, democracy/shared governance and open communication, and growth and change); Sanctuary tools (refer to Esaki et al., 2013); the therapy modalities and the therapeutic milieu where relationships occur.</p> | <p>Designed by: the Sanctuary Model was originally developed by Dr Sandra Bloom (and team) in 1997</p> <p>Implemented by: staff at the agency (not specified in any further detail)</p> | <p>Trauma is defined as “the mental result of one sudden external blow or a series of blows, rendering the young person temporarily helpless and breaking past ordinary coping and defense operations” (Scheidlinger, 2004).</p> <p>The paper described PTSD as “resulting from exposure to events that involve actual or threatened death or serious injury or a threat to one’s physical integrity, when both internal and external resources are inadequate to cope with the threat. The individual’s response to these events may involve fear, helplessness, and horror, the danger being responded to physically, cognitively, emotionally, socially, and behaviourally (Bloom, 1997; van der Kolk, 1989).”</p> |
| Prchal (2005) | Three residential, youth therapeutic services specialised to treat youths with conduct disorders and other serious | <p>Name: The Sanctuary Model (adapted)</p> <p>Aim: trauma recovery treatment framework teaches youths effective adaptation</p>                                                                                                                                                                                                                  | <p>Implementation begins with 8 hours of formal staff training in the basic principles of the model and methods of diffusing the model into the environment and all aspects of treatment. Tools are introduced that will be used in the psychoeducation program, such as “safety plans” which offer safe and healthy engagement alternatives for youths when feeling unsafe, upset or uncomfortable.</p> <p>Key components of the Sanctuary Model implementation included: development of a mission statement, community meetings held twice daily (the morning meeting to discuss plans for the day</p>                                                                                                                                                                                                                                                                                                                                                                                                                                                                                                                                                     | <p>Designed by: the Sanctuary Model was originally developed by Dr Sandra Bloom (and team) in 1997.</p>                                                                                 | Not specified                                                                                                                                                                                                                                                                                                                                                                                                                                                                                                                                                                                                                                                                                                         |

|                                                              |                                                                                                                                                |                                                                                                                                                                                                                                                                                                                                                                          |                                                                                                                                                                                                                                                                                                                                                                                                                                                                                                                                                                                                                                                                                                                                                                                                                                                                                                                                                                                                                                                                                                                                                                                                                                                                                                                                         |                                                                                                                                                                                                                                                          |                                                                                                                                                                                                                                                                                                                                                                       |
|--------------------------------------------------------------|------------------------------------------------------------------------------------------------------------------------------------------------|--------------------------------------------------------------------------------------------------------------------------------------------------------------------------------------------------------------------------------------------------------------------------------------------------------------------------------------------------------------------------|-----------------------------------------------------------------------------------------------------------------------------------------------------------------------------------------------------------------------------------------------------------------------------------------------------------------------------------------------------------------------------------------------------------------------------------------------------------------------------------------------------------------------------------------------------------------------------------------------------------------------------------------------------------------------------------------------------------------------------------------------------------------------------------------------------------------------------------------------------------------------------------------------------------------------------------------------------------------------------------------------------------------------------------------------------------------------------------------------------------------------------------------------------------------------------------------------------------------------------------------------------------------------------------------------------------------------------------------|----------------------------------------------------------------------------------------------------------------------------------------------------------------------------------------------------------------------------------------------------------|-----------------------------------------------------------------------------------------------------------------------------------------------------------------------------------------------------------------------------------------------------------------------------------------------------------------------------------------------------------------------|
|                                                              | emotional disturbances, North-eastern USA                                                                                                      | and coping skills to replace nonadaptive cognitive, social, and behavioural strategies that may have emerged earlier as a failed means of coping with trauma.                                                                                                                                                                                                            | and identify someone whom a youth can talk to if they need to, and the afternoon meeting for discussing how the school day went and plans for the evening), community meetings co-led by staff and youths, and staff use of psychoeducational exercises on the residential units.                                                                                                                                                                                                                                                                                                                                                                                                                                                                                                                                                                                                                                                                                                                                                                                                                                                                                                                                                                                                                                                       | Implemented by: clinical staff with oversight from the principal investigator.                                                                                                                                                                           |                                                                                                                                                                                                                                                                                                                                                                       |
| Rivard et al.(2005)                                          | Three residential, youth therapeutic services specialised to treat youths with conduct disorders and other serious emotional disturbances, USA | Name: The Sanctuary Model<br><br>Aim: To address the special needs of youth with serious emotional disturbances and histories of maltreatment and/or exposure to domestic and community violence. The Sanctuary Model aims to both strengthen the therapeutic community environment and to empower youths to influence their own lives and communities in positive ways. | The Sanctuary Model challenges organisations to re-examine their basic assumptions concerning the extent to which treatment environments promote safety and non-violence across physical, psychological, social and moral domains. The trauma recovery framework is referred to as SELF, which represents the four stages of recovery (Safety, Emotional management, Loss, and Future).<br><br><u>Safety</u> : learning to attain safety in self, relationships and the environment.<br><u>Emotional management</u> : tasks focus on identifying and managing emotions in response to memories, persons and events.<br><u>Loss</u> : involves feeling grief and dealing with personal losses.<br><u>Future</u> : calls for trying out new roles and ways of relative and behaving as a survivor to ensure personal safety and help others.<br><br>The Sanctuary Model is operationalised through a series of staff dialogues and staff evaluations of residential units' structure and functioning, staff training and ongoing technical assistance, twice-daily community meetings, a range of psychoeducational exercises that staff use in their daily interactions with youth, and weekly psychoeducational groups (Duffy, McCorkle & Ryan, 2002) to teach knowledge and skills needed to progress through four stages of recovery. | Designed by: The Sanctuary Model was developed by Dr Sandra Bloom (and team) in 1997<br><br>Implemented by: staff on the eight residential units (more detail not provided)                                                                              | The paper states that “the term “complex trauma” is being used to describe both the aspect of multiple exposure to traumatic events, and the enduring symptoms that can be manifested as children attempt to cope and integrate these traumatic experiences into their concepts of self, others, and their world (Cook, Blaustein, Spinazzola & van der Kolk, 2003).” |
| Rivard McCorkle, Duncan, Pasquale, Bloom & Abramovitz (2004) | Three residential, youth therapeutic services specialised to treat youths with conduct disorders and other serious emotional disturbances,     | Name: The Sanctuary Model<br><br>The aim of this model, adapted for adolescents in residential treatment programmes, is to strengthen the therapeutic community                                                                                                                                                                                                          | The Sanctuary Model challenges organisations to re-examine their basic assumptions concerning the extent to which treatment environments promote safety and non-violence across physical, psychological, social, and moral domains. The enhanced therapeutic community environment then sets the stage for the application of a trauma recovery framework (Foderaro & Ryan, 2000) and cognitive-behavioural strategies to teach youths effective adaptation and coping skills to replace non-adaptive cognitive, social, and behavioural patterns acquired as means of coping with traumatic and other stressful life experiences.<br><br>In the Sanctuary Model, staff and youth share responsibility in problem-solving, decision-making and creating a safe environment. Decision-making is accomplished through group processes aimed at “creative consensus”. Emphasis is placed on raising awareness of conflicts and conflict                                                                                                                                                                                                                                                                                                                                                                                                    | Designed by: the Sanctuary Model was developed by Dr Sandra Bloom (and team) in 1997<br><br>Implemented by: milieu counsellors, supervisors and clinicians are all trained in the principles of the model. Psychoeducational groups are co-led by milieu | Not specified                                                                                                                                                                                                                                                                                                                                                         |

|                                              |                                                                                          |                                                                                                                                                                                     |                                                                                                                                                                                                                                                                                                                                                                                                                                                                                                                                                                                                                                                                                                                                                                                                                                                                                                                                                                                                                                                                                                                                                                                                                                                                                                                                                                                                                                                                                                                                                                                                                                                                                                                    |                                                                                                                                                                                        |               |
|----------------------------------------------|------------------------------------------------------------------------------------------|-------------------------------------------------------------------------------------------------------------------------------------------------------------------------------------|--------------------------------------------------------------------------------------------------------------------------------------------------------------------------------------------------------------------------------------------------------------------------------------------------------------------------------------------------------------------------------------------------------------------------------------------------------------------------------------------------------------------------------------------------------------------------------------------------------------------------------------------------------------------------------------------------------------------------------------------------------------------------------------------------------------------------------------------------------------------------------------------------------------------------------------------------------------------------------------------------------------------------------------------------------------------------------------------------------------------------------------------------------------------------------------------------------------------------------------------------------------------------------------------------------------------------------------------------------------------------------------------------------------------------------------------------------------------------------------------------------------------------------------------------------------------------------------------------------------------------------------------------------------------------------------------------------------------|----------------------------------------------------------------------------------------------------------------------------------------------------------------------------------------|---------------|
|                                              | North-eastern USA                                                                        | environment and empowering youths to influence their own lives and communities in positive ways.                                                                                    | <p>resolution. Values, belief systems and norms of community are continuously defined and negotiated in a living-learning environment.</p> <p><u>Staff training and technical assistance:</u> Model implementation begins with eight hours of formal staff training in which milieu counsellors, supervisors and clinicians were trained in the basic principles of the Sanctuary Model and taught how to diffuse the model into the environment and into all aspects of the treatment program.</p> <p><u>Therapeutic community:</u> The philosophy of a therapeutic community is central to the Sanctuary Model (Bloom, 1997). The core values of a therapeutic community are: the community itself is the most influential factor on treatment; clients are responsible for much of their own treatment; the operation and management of the community should be more democratic than authoritarian; and clients can facilitate each other's treatment.</p> <p><u>Psychoeducation Program:</u> The therapeutic community environment sets the stage for delivering the psychoeducation program, which is organised around trauma theories discussed above and the SAGE recovery framework (Foderaro &amp; Ryan, 2000). The SAGE recovery framework accents the critical stages and tasks needed to affect recovery from traumatic life experiences. The four stages are safety, affect regulation, grieving, and empowerment (Foderaro &amp; Ryan, 2000). A 12-session psychoeducation group curriculum has been developed to formally introduce youths to the Sanctuary Model and to teach knowledge and skills needed to progress through the four stages of recovery (Duffy, McCorkle, &amp; Ryan, 2002).</p> | counsellors and clinicians. Technical assistance was provided by clinical consultants with expertise in trauma, and monthly by the model developer.                                    |               |
| Comprehensive tailored trauma-informed model |                                                                                          |                                                                                                                                                                                     |                                                                                                                                                                                                                                                                                                                                                                                                                                                                                                                                                                                                                                                                                                                                                                                                                                                                                                                                                                                                                                                                                                                                                                                                                                                                                                                                                                                                                                                                                                                                                                                                                                                                                                                    |                                                                                                                                                                                        |               |
| Boel-Studt et al. (2017)                     | Psychiatric residential facilities of a large Behavioural Health Agency, Mid-western USA | <p>No name assigned</p> <p>Aim to provide a wide range of programs and services aimed at helping families and children achieve improved functioning, well-being, and permanency</p> | <p>The program provided ongoing clinical services including individual therapy and family therapy when feasible. In addition to stabilising psychiatric symptoms, services focused on improving self-concept and teaching effective social and problem-solving skills. The agency also used a family-centred approach that focused on the inclusion of families in decision making and treatment planning.</p> <p><u>Organisational components:</u> All staff received orientation, ongoing training, and supervision in understanding trauma and in working effectively with trauma-affected youth. Central to the approach was the creation of a supportive, therapeutic environment within the treatment setting where the program staff and youth are all viewed as members of a shared community.</p> <p><u>Clinical components:</u> Youth received individual trauma focused therapy including EMDR or TF-CBT and participated in a trauma recovery group-based curriculum 2 times per week. The trauma recovery curriculum was a multimodal, multi-layered program based on a combination of trauma treatments.</p>                                                                                                                                                                                                                                                                                                                                                                                                                                                                                                                                                                                         | Designed by: The TIC programme was adapted in consultation with national trauma experts and a network that provides education, consultation, and training in trauma-informed services. | Not specified |
| Brown et al. (2013)                          | Three residential child and adolescent treatment units for young people with severe      | Name: Trauma Systems Therapy (adapted for residential settings)                                                                                                                     | TST provides both an organising framework for identifying and coordinating the different service elements as well as a clinical model that describes exactly what providers do once they are brought together. The four primary service modules within TST include: 1) home- and community-based care; 1) outpatient, skills-based psychotherapy; 3) psychopharmacology; and 4) services advocacy. Each service is provided by different clinicians who are literally "brought to the table" to                                                                                                                                                                                                                                                                                                                                                                                                                                                                                                                                                                                                                                                                                                                                                                                                                                                                                                                                                                                                                                                                                                                                                                                                                    | Designed by: Glenn Saxe and colleagues (2007)                                                                                                                                          | Not specified |

|                            |                                                                                                                                               |                                                                                                                                                                                                                                                                                                                                                                                                                                                                                                                                               |                                                                                                                                                                                                                                                                                                                                                                                                                                                                                                                                                                                                                                                                                                                                                                                                                                                                                                                                                                                                                                                                                                                                 |                                                                                                                                      |                      |
|----------------------------|-----------------------------------------------------------------------------------------------------------------------------------------------|-----------------------------------------------------------------------------------------------------------------------------------------------------------------------------------------------------------------------------------------------------------------------------------------------------------------------------------------------------------------------------------------------------------------------------------------------------------------------------------------------------------------------------------------------|---------------------------------------------------------------------------------------------------------------------------------------------------------------------------------------------------------------------------------------------------------------------------------------------------------------------------------------------------------------------------------------------------------------------------------------------------------------------------------------------------------------------------------------------------------------------------------------------------------------------------------------------------------------------------------------------------------------------------------------------------------------------------------------------------------------------------------------------------------------------------------------------------------------------------------------------------------------------------------------------------------------------------------------------------------------------------------------------------------------------------------|--------------------------------------------------------------------------------------------------------------------------------------|----------------------|
|                            | <p>psychiatric disorders, Boston, USA</p>                                                                                                     | <p>Overall aim: to help the youth become better regulated as well as to help stabilise the social environment that is contributing to their emotional dysregulation.</p> <p>Aims at each of the residential units:<br/>         BOSTON IRTP: The TST program was initially implemented as a restraint reduction program.</p> <p>The Children's Village: Not reported</p> <p>KVC Health Systems: To ensure that youth leaving residential care received the same, consistent, child-specific TST services in the community upon discharge.</p> | <p>serve on a multi-speciality TST team to genuinely effect a comprehensive and collaborative treatment.</p> <p>TST was originally created as an outpatient and home-based treatment model. A full description of the principles and practice of TST can be found in the published manual (Saxe et al. 2007). Key features of the adaptation of TST to residential care settings include the creation of a common language of care; assessment and treatment planning based on a shared approach and using clinical data; a focus on the social environment of the residential milieu; family involvement; and TST as a vehicle to integrate care.</p> <p>Organisational innovations that can help with the successful implementation of TST in residential settings include hiring a full-time staff member as a TST coordinator; redefining the role of the lead clinician within the milieu to become the TST team leader; creating increased time for treatment planning meetings; and changing job descriptions and performance evaluations to align with TST benchmarks (e.g., adherence to the "10 TST Principles").</p> | <p>Implemented by: clinicians who make up a multi-speciality TST team</p>                                                            |                      |
| <p>Cadiz et al. (2004)</p> | <p>Residential treatment programme for women with alcohol/other drug problems, mental health problems and trauma histories, New York, USA</p> | <p>Name: Project Portal: female-focused treatment strategy</p> <p>Aim: to intervene with the complex issues of trauma, substance use problems and mental illness as they occur among a female, addicted population</p>                                                                                                                                                                                                                                                                                                                        | <p>The Portal Project documented the critical components of an integrated system: peer and consumer involvement, gender-specific services, culturally competent practices, cross-training attention to trauma, multidisciplinary team approach, and a dual focus on co-occurring disorders.</p> <p>Gender specific treatment included a strength based, non-confrontational, safe, nurturing, and supportive environment. Multidisciplinary team models brought together professionals from different fields to develop a holistic portrait of the client, essential for an integrated system of care. Emphasis was placed on the integration of the intervention into already existing treatment. The integration was achieved by having the Women's Treatment Specialist become part of the treatment team on the unit. In addition to being on the Treatment Team, the Women's Treatment</p>                                                                                                                                                                                                                                 | <p>Designed and implemented by: Developed and implemented by the residential treatment programme service provider (Palladia Inc)</p> | <p>Not specified</p> |

|                       |                                                                                                                             |                                                                                                                                                               |                                                                                                                                                                                                                                                                                                                                                                                                                                                                                                                                                                                                                                                                                                                                                                                                                                                                                                                                                                                                                                                                                                                                                                                                                                                                                                                                                                                                                                                                                                                                          |                                                                                                                                                                                                                                                                                                                                                                                                                                                                                                                                                                                                                                                                                                                                                                            |               |
|-----------------------|-----------------------------------------------------------------------------------------------------------------------------|---------------------------------------------------------------------------------------------------------------------------------------------------------------|------------------------------------------------------------------------------------------------------------------------------------------------------------------------------------------------------------------------------------------------------------------------------------------------------------------------------------------------------------------------------------------------------------------------------------------------------------------------------------------------------------------------------------------------------------------------------------------------------------------------------------------------------------------------------------------------------------------------------------------------------------------------------------------------------------------------------------------------------------------------------------------------------------------------------------------------------------------------------------------------------------------------------------------------------------------------------------------------------------------------------------------------------------------------------------------------------------------------------------------------------------------------------------------------------------------------------------------------------------------------------------------------------------------------------------------------------------------------------------------------------------------------------------------|----------------------------------------------------------------------------------------------------------------------------------------------------------------------------------------------------------------------------------------------------------------------------------------------------------------------------------------------------------------------------------------------------------------------------------------------------------------------------------------------------------------------------------------------------------------------------------------------------------------------------------------------------------------------------------------------------------------------------------------------------------------------------|---------------|
|                       |                                                                                                                             | within a residential drug treatment setting                                                                                                                   | <p>Specialist also co-led the group interventions with the mental health staff already employed at the intervention site.</p> <p>System level integration for the Portal Project consisted of two key interventions: (a) monthly Multi-Disciplinary Team Case Conferences (MDTCC) and (b) quarterly Policy Action Committee (PAC) meetings.</p> <p>The curriculum differed slightly from group to group depending on the needs of particular members. Some chapters of Seeking Safety covered that were not in the original group format are: "Setting Boundaries," "Dealing with Anger," "The Life Choices Game" and "Healthy Relationships."</p>                                                                                                                                                                                                                                                                                                                                                                                                                                                                                                                                                                                                                                                                                                                                                                                                                                                                                       |                                                                                                                                                                                                                                                                                                                                                                                                                                                                                                                                                                                                                                                                                                                                                                            |               |
| Forrest et al. (2018) | Residential mixed-gender treatment programmes for young people (ages 12-22 years) with mental disorders, Massachusetts, USA | <p>Name: Building Communities of Care (BCC)</p> <p>Aim: to maximise positive outcomes and minimise cost for youth and organisations (taken from abstract)</p> | <p><u>Integration</u>: BCC intentionally coordinates milieu programming, behaviour management, clinical intervention, and family relationships across systems with a common language.</p> <p><u>Individualised</u>: BCC is predicated upon the notion that trauma-impacted youth display a variety of, often complex, clinical profiles and that when it comes to treatment planning, "one size does not fit all".</p> <p><u>Proactive</u>: The role of BCC caregivers is to collaboratively design, implement, and maintain an environmental culture where instances of client dysregulation and difficulty become a rare occurrence. Milieu staff members, often the most available caregivers, support client capacity for self-regulation to proactively mitigate behaviours that may necessitate restraint, such as aggression, self-harm, and runaway behaviours</p> <p><u>Implementation procedure</u>: Trainings took place for eight hours a day over the course of three days and were led by the developers of BCC. Those who did not meet these standards were provided an opportunity to retake the training at a later point. Fidelity was ensured through the constant presence of at least two trainers in each establishment, with one being a senior trainer. Additionally, the application of the model was continuously monitored through quarterly senior trainer meetings and annual trained trainer meetings. Trainers were recertified yearly by completing eight hours of refresher certification training.</p> | <p>Designed by: The organisation established a taskforce that convened over 12-months to assess the degree to which their residential schools, group homes and treatment centres were trauma-informed. Stakeholder interviews with administrators, direct care workers, and consumers across six residential programs suggested inconsistent integration of trauma-informed programming with behaviour and crisis response management, which highlighted an important gap in residential programming generally. Consequently, a workgroup was established to develop an evidence-informed care model that integrated trauma-informed principles and behaviour management into an organisational framework.</p> <p>Implemented by: Trainings were led by the developers</p> | Not specified |

|                     |                                                                                                                                                                                                                                                                                                                                                                                      |                                                                                                                                                                                                                       |                                                                                                                                                                                                                                                                                                                                                                                                                                                                                                                                                                                                                                                                                                                                                                                                                                                                                                                                                                                                                                                                                                                                                                                                                                                                                                                                                                                                                                                                                                                                                                                                                                                                                                                                                                                                                                                                                                                                                                                                                                                                                                                                                                                                                                                                                                                                                                                                                                                                                                                                                                                                                                                                                                                                                                                                                                                                                                                                                                                                                                                                                                                                                                                                                                                                                                                                                                                                                         |                                                                                                                                                                                                                                                                      |               |
|---------------------|--------------------------------------------------------------------------------------------------------------------------------------------------------------------------------------------------------------------------------------------------------------------------------------------------------------------------------------------------------------------------------------|-----------------------------------------------------------------------------------------------------------------------------------------------------------------------------------------------------------------------|-------------------------------------------------------------------------------------------------------------------------------------------------------------------------------------------------------------------------------------------------------------------------------------------------------------------------------------------------------------------------------------------------------------------------------------------------------------------------------------------------------------------------------------------------------------------------------------------------------------------------------------------------------------------------------------------------------------------------------------------------------------------------------------------------------------------------------------------------------------------------------------------------------------------------------------------------------------------------------------------------------------------------------------------------------------------------------------------------------------------------------------------------------------------------------------------------------------------------------------------------------------------------------------------------------------------------------------------------------------------------------------------------------------------------------------------------------------------------------------------------------------------------------------------------------------------------------------------------------------------------------------------------------------------------------------------------------------------------------------------------------------------------------------------------------------------------------------------------------------------------------------------------------------------------------------------------------------------------------------------------------------------------------------------------------------------------------------------------------------------------------------------------------------------------------------------------------------------------------------------------------------------------------------------------------------------------------------------------------------------------------------------------------------------------------------------------------------------------------------------------------------------------------------------------------------------------------------------------------------------------------------------------------------------------------------------------------------------------------------------------------------------------------------------------------------------------------------------------------------------------------------------------------------------------------------------------------------------------------------------------------------------------------------------------------------------------------------------------------------------------------------------------------------------------------------------------------------------------------------------------------------------------------------------------------------------------------------------------------------------------------------------------------------------------|----------------------------------------------------------------------------------------------------------------------------------------------------------------------------------------------------------------------------------------------------------------------|---------------|
|                     |                                                                                                                                                                                                                                                                                                                                                                                      |                                                                                                                                                                                                                       |                                                                                                                                                                                                                                                                                                                                                                                                                                                                                                                                                                                                                                                                                                                                                                                                                                                                                                                                                                                                                                                                                                                                                                                                                                                                                                                                                                                                                                                                                                                                                                                                                                                                                                                                                                                                                                                                                                                                                                                                                                                                                                                                                                                                                                                                                                                                                                                                                                                                                                                                                                                                                                                                                                                                                                                                                                                                                                                                                                                                                                                                                                                                                                                                                                                                                                                                                                                                                         | of BCC. A train-the-trainer implementation approach was used.                                                                                                                                                                                                        |               |
| Goetz et al. (2012) | Four psychiatric services: a residential treatment program for female adolescents (ages 12-18 years), an acute inpatient adolescent unit (ages 12-18 years), an adult inpatient unit (aged 19 years and above), and a sub-acute unit for adults with substance use and mental health problems requiring longer lengths of stay, Behavioural Health Services Hospital, Midwestern USA | Name: Broader model within which TIC was implemented: Patient-Focused Intervention model<br><br>Aim: to eliminate the use of seclusion and restraint in behavioural health settings, and to build a culture of safety | <u>Organisational changes:</u> One of the first decisions was to hire a director of clinical services with a master's degree (MSN) in psychiatric nursing and extensive administrative and clinical experience in inpatient psychiatric settings. Another decision was to embrace a consistent model of patient care and aggression intervention that decreased the trauma of the inpatient experience. National experts were brought into the state to introduce trauma-free concepts, and one of those experts conducted a workshop on trauma-informed care to introduce the local staff and community providers to these principles. The planning team used these concepts in mapping out the model for violence prevention.<br><u>Collaboration with patients, staff, administrators, and external experts:</u> Feedback from these stakeholders allowed the continuous quality improvement cycle to evolve to excellence. Focus groups and surveys, as well as ongoing interaction with the security department and other ancillary departments, such as housekeeping and nutrition services, provided additional venues for feedback on the model. The management team took turns rounding weekly to meet with at least 10% of the patients to assess how well the staff was implementing the Caring Rounds and to ask patients what they liked about the care they were receiving and any suggestions they might have for improving it.<br><u>Intervention in adolescent unit:</u> To facilitate the implementation of trauma-informed care, in 2005, the hospital sponsored a workshop with Beth Caldwell, Director of Substance Abuse and Mental Health Services Administration (SAMHSA)/Center for Mental Health Services/Child and Family Branch's National Building Bridges Initiative, on trauma-informed care. Key personnel from the hospital attended the 2-day workshop, which set the stage for the next 5 years and infused trauma-informed care principles into the treatment programs at the hospital.<br><u>Aggression management:</u> A new approach to aggression management was chosen based on an evaluation of the currently available commercial models. The Sorensen and Wilder Associates aggression management program (SWA) was selected as the one best fitting the organisation's current needs. In this model, using the steps of a ladder as an analogy, the stages of aggression were conceptualised as ranging from 1 to 6 (Wilder & Sorensen, 2000).<br><u>Leadership involvement:</u> As part of the leadership review, the nursing management, the nurse quality specialist, and the safety committee analysed monthly data on restraint and injury for trends such as time of day or unit where events were occurring.<br><u>Intervention in adult units:</u> The recovery model was incorporated into the adult and adult subacute programs in 2006. As an initial step, staff members were individually certified in the Wellness Recovery Action Plan (WRAP) approach. The WRAP approach is evidence based, with studies showing significant increases in consumer reporting of early warning signs, identification and tools for coping, their preference for using personal supports, the use of wellness in their daily self-care, and hope of recovery.<br><u>Staff education:</u> Education for all clinical staff included annual The Sorensen and Wilder Associates | The multidisciplinary team that planned and implemented the culture change model consisted of the director of clinical services, the director of risk management, the employee health nurse, and the clinical program manager for the residential treatment program. | Not specified |

|                         |                                                                    |                                                                                                                                                                                                                                                                                                                                                                                                                                                                                |                                                                                                                                                                                                                                                                                                                                                                                                                                                                                                                                                                                                                                                                                                                                                                                                                                                                                                                                                                                                                                                                                                                                                                                                                                                                                                                                                                                                                                                                                                                                                                                                                                                                                                                                                                                                                                                                                                                                                                                                                                                                                 |                                                                                                                                                                                                                                                                                                                                  |                                                                                                                                                                                                                                                                                                                                                                                                                                                      |
|-------------------------|--------------------------------------------------------------------|--------------------------------------------------------------------------------------------------------------------------------------------------------------------------------------------------------------------------------------------------------------------------------------------------------------------------------------------------------------------------------------------------------------------------------------------------------------------------------|---------------------------------------------------------------------------------------------------------------------------------------------------------------------------------------------------------------------------------------------------------------------------------------------------------------------------------------------------------------------------------------------------------------------------------------------------------------------------------------------------------------------------------------------------------------------------------------------------------------------------------------------------------------------------------------------------------------------------------------------------------------------------------------------------------------------------------------------------------------------------------------------------------------------------------------------------------------------------------------------------------------------------------------------------------------------------------------------------------------------------------------------------------------------------------------------------------------------------------------------------------------------------------------------------------------------------------------------------------------------------------------------------------------------------------------------------------------------------------------------------------------------------------------------------------------------------------------------------------------------------------------------------------------------------------------------------------------------------------------------------------------------------------------------------------------------------------------------------------------------------------------------------------------------------------------------------------------------------------------------------------------------------------------------------------------------------------|----------------------------------------------------------------------------------------------------------------------------------------------------------------------------------------------------------------------------------------------------------------------------------------------------------------------------------|------------------------------------------------------------------------------------------------------------------------------------------------------------------------------------------------------------------------------------------------------------------------------------------------------------------------------------------------------------------------------------------------------------------------------------------------------|
|                         |                                                                    |                                                                                                                                                                                                                                                                                                                                                                                                                                                                                | aggression management program certification, restraint and seclusion techniques, policies, and competencies, as well as many other formal, hospital-wide education topics.                                                                                                                                                                                                                                                                                                                                                                                                                                                                                                                                                                                                                                                                                                                                                                                                                                                                                                                                                                                                                                                                                                                                                                                                                                                                                                                                                                                                                                                                                                                                                                                                                                                                                                                                                                                                                                                                                                      |                                                                                                                                                                                                                                                                                                                                  |                                                                                                                                                                                                                                                                                                                                                                                                                                                      |
| Stamatopoulou (2019)    | Inpatient female forensic mental health unit, Northern England, UK | No name assigned<br><br>Aim: to encourage staff to utilise the skills learnt during the training to minimise ways in which the ward may contribute to re-traumatisation, in order to cultivate a welcome and safe environment within the ward. Staff was also encouraged to allow for greater flexibility and support service user input when establishing norms and rules. Staff were encouraged to utilise the skills to help service users establish a feeling of safeness. | This trauma-informed care pilot intervention was implemented in the forensic service through the following:<br><br><u>Staff training:</u> All staff received a two-day development and training programme at the beginning of the implementation process to increase their knowledge of the impact of trauma, to develop skills in crisis intervention and to develop practical skills to work with trauma on a ward level.<br><u>Establishing a welcoming and safe environment:</u> Staff were encouraged to utilise the skills learnt during the training to minimise ways in which the ward may contribute to re-traumatisation, in order to cultivate a welcome and safe environment within the ward. Staff were also encouraged to allow for greater flexibility and to support service user input when establishing norms and rules.<br><u>Establishing safety plans:</u> Clinicians developed safety plans with service users through care planning and five sessions of cognitive analytic therapy (82) which identified triggers, emotions, and coping strategies to prevent and manage crises.<br><u>Establishing activities on the ward:</u> Core sessions of art, occupational activities, self-soothing, emotional regulation and mindfulness were offered within service user care plans as techniques to promote a sense of calm and safety.<br><u>One-to-one debrief sessions:</u> Service users were given a one-to-one debrief following incidents of seclusion, deliberate self-harm or restraint to promote healing, recovery, and learning, as well as re-establishing the therapeutic relationship.<br><u>Trauma Champions:</u> A member of staff was nominated as the daily Trauma Champion. This role involved ensuring that core sessions followed the need of service users using a passport system that identified which activities were re-energising and which were grounding.<br><u>Fortnightly reflective groups:</u> Staff and service users engaged in fortnightly reflective groups, including a cognitive analytic therapy reflective group. | Designed by: not specified<br><br>Implemented by: The TIC lead for the NHS Trust oversaw the implementation of TIC across adult services in the Trust. All staff attended a two-day development and training programme about TIC and the pilot intervention. Specific roles of staff in implementation not described.            | Defines psychological trauma as “events or circumstances which are experienced as hurtful or life-threatening and that have lasting effects on the emotional, physical and/or social wellbeing of a person (SAMHSA, 2014). Trauma may include witnessing or experiencing a single event such as an accident or trauma may result from repeated exposure to extreme external events and circumstances such as ongoing abuse or torture (Terr, 1991).” |
| Tompkins & Neale (2016) | A female residential substance use treatment unit, UK              | No name assigned<br><br>No aims specified                                                                                                                                                                                                                                                                                                                                                                                                                                      | <u>Staff training and support:</u> Staff were all trained in trauma-informed approaches and received regular professional support and supervision from within the organisation. Every month, they also received team support and supervision from an experienced trauma therapist who was external to the organisation. The organisation also commissioned two days of intensive trauma-informed staff training from the US author of a manualised treatment programme.<br><u>Staff recruitment:</u> Managerial staff stated that they actively recruited women who had direct personal experience of recovery and women with prior experience of working with women and/or substance users. They sought to recruit staff whom they considered to be compassionate, understanding, nurturing, dedicated, self-disciplined and assertive.<br><u>Screening for trauma:</u> All potential residential clients were screened for trauma on referral.<br><u>Support offered to clients:</u> Clients participated in a range of group therapies based on manualised trauma-informed treatment programmes. They were also offered individual counselling, EMDR, and family support according to their specific needs, had access to a structured programme of                                                                                                                                                                                                                                                                                                                                                                                                                                                                                                                                                                                                                                                                                                                                                                                                                          | Designed by: Not specified<br><br>Implemented by: All staff were trained in trauma-informed approaches and received regular professional support and supervision from within the organisation. Staff also attended two days of intensive trauma-informed training from the US author of a manualised trauma treatment programme. | Trauma is defined “as ‘exposure to actual or threatened death, serious injury or sexual violation’ (American Psychiatric Association, 2013).”                                                                                                                                                                                                                                                                                                        |



|                                                 |                                                                                                                |                                                                                                                                                                                                                                                                                                                                           |                                                                                                                                                                                                                                                                                                                                                                                                                                                                                                                                                                                                                                                                                                                                                                                                                                                                                                                                                                                                                                                                                                                                                                                                                                                                                                                                                                                                                                                                                                                                                                                                                                                                                                                                          |                                                                                                                                                                                                      |               |
|-------------------------------------------------|----------------------------------------------------------------------------------------------------------------|-------------------------------------------------------------------------------------------------------------------------------------------------------------------------------------------------------------------------------------------------------------------------------------------------------------------------------------------|------------------------------------------------------------------------------------------------------------------------------------------------------------------------------------------------------------------------------------------------------------------------------------------------------------------------------------------------------------------------------------------------------------------------------------------------------------------------------------------------------------------------------------------------------------------------------------------------------------------------------------------------------------------------------------------------------------------------------------------------------------------------------------------------------------------------------------------------------------------------------------------------------------------------------------------------------------------------------------------------------------------------------------------------------------------------------------------------------------------------------------------------------------------------------------------------------------------------------------------------------------------------------------------------------------------------------------------------------------------------------------------------------------------------------------------------------------------------------------------------------------------------------------------------------------------------------------------------------------------------------------------------------------------------------------------------------------------------------------------|------------------------------------------------------------------------------------------------------------------------------------------------------------------------------------------------------|---------------|
|                                                 |                                                                                                                |                                                                                                                                                                                                                                                                                                                                           | education skills, training, and recreational activities, and attended local fellowship meetings (Narcotics Anonymous and Alcoholics Anonymous).                                                                                                                                                                                                                                                                                                                                                                                                                                                                                                                                                                                                                                                                                                                                                                                                                                                                                                                                                                                                                                                                                                                                                                                                                                                                                                                                                                                                                                                                                                                                                                                          |                                                                                                                                                                                                      |               |
| Zweben et al. (2015)                            | Residential substance use treatment program for women who are pregnant or have young children, California, USA | Name: Celebrating Families! (CF!)<br><br>Aim: to provide education and skill building to families who have been impacted by domestic violence, child abuse or neglect and by substance use disorder. It aims to increase the resiliency of all participants, strengthen their family and social connections and decrease their isolation. | Celebrating Families! (CF!), a program designed specifically for families in which one or both parents have a serious problem with alcohol and other drugs and are at high risk for domestic violence, child abuse, and neglect. Participants in CF! Include the mother and child (or children) in residence, grandparents, friends, aunts and uncles, siblings, and other supportive individuals in the mothers' lives. It focuses on family-centred treatment practices and is a multifamily/multigenerational event. CF! Sessions are provided weekly over 16 weeks, enabling all residents and their identified extended family members to attend. Each session of CF! Is a three-and-a-half-hour program which begins with a family meal followed by subgroup programming for adults, children and adolescents, with age-appropriate materials.<br><br>Following the family dinner, participants attend a 90-minute instructional session on the following themes: 1) healthy living; 2) nutrition; 3) communication; 4) feelings and defences; 5) anger management; 6) facts about alcohol; tobacco, and other drugs; 6) addiction as a disease; 8) the effects of addiction on the whole family; 9) goal-setting; 10) making healthy choices; 11) healthy boundaries; 12) healthy friendships and relationships; and 13) individual uniqueness. Patients then reunite with their children for a 30-minute activity to practice what has been represented and learned and to give feedback on their performance. Mothers are carefully assisted in identifying family, friends, partners, and significant other who are, or can become, part of a positive, safe and supportive community for the women when they leave treatment. | Developed by: Tisch & Sibley, 2007, within the Centre for the Study of Social Policy (CSSP)<br><br>Implemented by: staff at the residential treatment programme (more specific details not provided) | Not specified |
| Blair et al, (2017)                             | A mixed gender psychiatric inpatient service of a large urban hospital, Connecticut, USA                       | No name assigned<br><br>Aim to reduce use of seclusion and restraint                                                                                                                                                                                                                                                                      | Model components included routine use of the Brøset Violence Checklist (BVC), mandated staff education in crisis intervention and trauma informed care, increased frequency of physician re-assessment of the need for seclusion and restraint, formal administrative review of seclusion and restraint events and environmental enhancements (e.g., comfort rooms to support sensory modulation).<br><br>Staff education included a standardised 8 h crisis intervention course that emphasised de-escalation techniques, a new method of nursing assignments to maximise staff presence in the milieu and training in "Risking Connections" (a two-day program based on a trauma-informed model of care, the goal of which is to reduce staff behaviours that can exacerbate "trauma reactions" in patients).<br><br>Changes in the seclusion and restraint protocol required that the Medical Director and the Director of Nursing examine all seclusion and restraint events to determine if a formal administrative review was needed (based on severity and outcome).                                                                                                                                                                                                                                                                                                                                                                                                                                                                                                                                                                                                                                                              | Not specified                                                                                                                                                                                        | Not specified |
| Safety focussed tailored trauma-informed models |                                                                                                                |                                                                                                                                                                                                                                                                                                                                           |                                                                                                                                                                                                                                                                                                                                                                                                                                                                                                                                                                                                                                                                                                                                                                                                                                                                                                                                                                                                                                                                                                                                                                                                                                                                                                                                                                                                                                                                                                                                                                                                                                                                                                                                          |                                                                                                                                                                                                      |               |
| Borckardt et al. (2011)                         | Five inpatient psychiatric wards:                                                                              | No name assigned                                                                                                                                                                                                                                                                                                                          | An engagement model was developed and comprised components (trauma informed care, rules and language, therapeutic environment, and patient involvement in treatment planning) that were                                                                                                                                                                                                                                                                                                                                                                                                                                                                                                                                                                                                                                                                                                                                                                                                                                                                                                                                                                                                                                                                                                                                                                                                                                                                                                                                                                                                                                                                                                                                                  | Not specified                                                                                                                                                                                        | Not specified |

|                                       |                                                                                                                                                                                  |                                                                                                                                                                                                                                          |                                                                                                                                                                                                                                                                                                                                                                                                                                                                                                                                                                                                                                                                                                                                                                                                                                                                                                                                                                                                                                                                                                                                                                                                                                                                                                                                                                                                                                    |                                                                                                                                                                                                                                                                                                                                                                                            |               |
|---------------------------------------|----------------------------------------------------------------------------------------------------------------------------------------------------------------------------------|------------------------------------------------------------------------------------------------------------------------------------------------------------------------------------------------------------------------------------------|------------------------------------------------------------------------------------------------------------------------------------------------------------------------------------------------------------------------------------------------------------------------------------------------------------------------------------------------------------------------------------------------------------------------------------------------------------------------------------------------------------------------------------------------------------------------------------------------------------------------------------------------------------------------------------------------------------------------------------------------------------------------------------------------------------------------------------------------------------------------------------------------------------------------------------------------------------------------------------------------------------------------------------------------------------------------------------------------------------------------------------------------------------------------------------------------------------------------------------------------------------------------------------------------------------------------------------------------------------------------------------------------------------------------------------|--------------------------------------------------------------------------------------------------------------------------------------------------------------------------------------------------------------------------------------------------------------------------------------------------------------------------------------------------------------------------------------------|---------------|
|                                       | an adult unit, a geriatric unit, a general adult unit, a substance abuse unit, and a child and adolescent unit at one large state-funded psychiatric hospital, South-eastern USA | Aim to reduce use of seclusion and restraint                                                                                                                                                                                             | <p>organised and operationalised to be as uniform as possible between the diverse inpatient units. Each phase of the implementation schedule was three months in duration.</p> <p>All unit staff attended a half-day standardised training seminar on the nature of trauma and its effects on patients' experiences, physiology, and psychological processes, along with instructions on how to minimise engaging in behaviours that could exacerbate trauma-related reactions from service users. For patient involvement in treatment planning, all unit staff attended a half-day standardised training seminar on the rationale for and clinical benefits of involving patients in the treatment planning process.</p> <p>For rules and language, all unit staff attended a standardised training seminar on the effect of rules and language on service users' perceptions. All unit staff attended a follow-up half-day seminar during which the rule changes were articulated and the effect of coercive language on patients' experiences was discussed.</p> <p>The therapeutic environment intervention involved making inexpensive physical changes, including repainting walls with warm colours, placement of decorative throw rugs and plants, and rearrangement of furniture to facilitate increased service user-staff interaction, as well as holding staff-service user group meetings regularly on the unit.</p> |                                                                                                                                                                                                                                                                                                                                                                                            |               |
| Jones (2021)                          | National high secure inpatient psychiatric service for women (NHSHSW), East Midlands, UK                                                                                         | <p>Name: Trauma and Self Injury programme (TASI)</p> <p>Aim: to provide a model of care underpinned by a clear philosophy that would give meaning to practice interventions to help meet the needs of women detained in the service.</p> | <p>TASI is a bespoke trauma-informed framework of care that was developed to address the specific needs of women patients who were known to require high secure forensic healthcare. It is delivered via three interconnected layers of care including: proactive interventions, direct practice, enhancement of the therapeutic milieu, and the provision of individual and group therapies. TASI was developed as a dynamic approach and consists of three distinct levels of service provision all of which are informed by a patient reference group.</p> <p>Level 1: focuses on proactive interventions to promote understanding through training, on ward support and supervision of staff, and through the provision of psychoeducation and wellbeing groups for women patients.</p> <p>Level 2: encompasses the impact on direct practice and the enhancement of the therapeutic milieu in delivering a safe collaborative environment which promotes the development of women's capacity to deal differently with their distress.</p> <p>Level 3: concentrates on the provision of individual and group therapies.</p>                                                                                                                                                                                                                                                                                                    | Designed and implemented by: A multidisciplinary team of healthcare professionals working within the NHSHSW developed the TASI in 2007 when the NHSHSW opened. The multidisciplinary team consulted with a patient reference group. The researcher involved in this study was a member of the team who developed, implemented and evaluated the bespoke conceptual framework for the TASI. | Not specified |
| Trauma informed training intervention |                                                                                                                                                                                  |                                                                                                                                                                                                                                          |                                                                                                                                                                                                                                                                                                                                                                                                                                                                                                                                                                                                                                                                                                                                                                                                                                                                                                                                                                                                                                                                                                                                                                                                                                                                                                                                                                                                                                    |                                                                                                                                                                                                                                                                                                                                                                                            |               |
| Aremu et al. (2018)                   | Inpatient adult psychiatric unit, Illinois, USA                                                                                                                                  | <p>No name assigned</p> <p>Aim: to strengthen trauma-informed practice by increasing</p>                                                                                                                                                 | Leaders within the service made a commitment to implementing trauma-informed principles and using best evidence to reduce the risk of retraumatising service users and keeping service users and staff safe.                                                                                                                                                                                                                                                                                                                                                                                                                                                                                                                                                                                                                                                                                                                                                                                                                                                                                                                                                                                                                                                                                                                                                                                                                       | <p>Designed by: Not stated.</p> <p>Implemented by: the Inpatient Adult Psychiatric</p>                                                                                                                                                                                                                                                                                                     | Not specified |

|                              |                                                                                                                         |                                                                                                                                                                               |                                                                                                                                                                                                                                                                                                                                                                                                                                                                                                                                                                                                                                                                                                                                                                                                                                                                                                                                                                                                                                                                                                                                                                                                                                                                                                                                                                                                                                                                                                                                                                                                                                                                                                                                                                                                                                                                                                   |                                                                                                                                                                                                                                                     |                                                                                                                                                                                                                                                                                                                                                                                                                                               |
|------------------------------|-------------------------------------------------------------------------------------------------------------------------|-------------------------------------------------------------------------------------------------------------------------------------------------------------------------------|---------------------------------------------------------------------------------------------------------------------------------------------------------------------------------------------------------------------------------------------------------------------------------------------------------------------------------------------------------------------------------------------------------------------------------------------------------------------------------------------------------------------------------------------------------------------------------------------------------------------------------------------------------------------------------------------------------------------------------------------------------------------------------------------------------------------------------------------------------------------------------------------------------------------------------------------------------------------------------------------------------------------------------------------------------------------------------------------------------------------------------------------------------------------------------------------------------------------------------------------------------------------------------------------------------------------------------------------------------------------------------------------------------------------------------------------------------------------------------------------------------------------------------------------------------------------------------------------------------------------------------------------------------------------------------------------------------------------------------------------------------------------------------------------------------------------------------------------------------------------------------------------------|-----------------------------------------------------------------------------------------------------------------------------------------------------------------------------------------------------------------------------------------------------|-----------------------------------------------------------------------------------------------------------------------------------------------------------------------------------------------------------------------------------------------------------------------------------------------------------------------------------------------------------------------------------------------------------------------------------------------|
|                              |                                                                                                                         | patient engagement, and improving staff's skills at intervening in escalating situations                                                                                      | Existing and new staff received education on patient engagement and improving staff skills at intervening in escalating situations. This included educating staff on their role in creating and maintaining a trauma-informed organisation, building trusting relationships, and creating a safe, healing environment. Educational components included strategies focused on increasing the amount and quality of staff engagement with patients.                                                                                                                                                                                                                                                                                                                                                                                                                                                                                                                                                                                                                                                                                                                                                                                                                                                                                                                                                                                                                                                                                                                                                                                                                                                                                                                                                                                                                                                 | Unit. Unclear who delivered the training.                                                                                                                                                                                                           |                                                                                                                                                                                                                                                                                                                                                                                                                                               |
| Gonshak (2011)               | Female adolescents in a residential treatment centre for children who have severe emotional disabilities, Kentucky, USA | Name: Risking Connection<br><br>Aim: to inform teachers of the effects of abuse and neglect trauma and to provide them with strategies to better connect with their students. | <u>Staff education and training:</u> The three areas emphasised in the Risking Connection curriculum are: (1) an overarching theoretical framework to guide work with trauma and abuse survivors; (2) specific intervention techniques to use with survivor clients; and (3) a focus on the needs of trauma workers as well as those of their clients.<br><u>Understanding trauma:</u> The first part of the training curriculum deals with understanding trauma. It emphasises that it is an individual's subjective experience that determines whether an event is or is not traumatic. Risking Connection specifically teaches the treater about trauma and encourages the treater to teach the adolescent survivor about trauma as well.<br><u>Importance of relationships:</u> Consistent with attachment theory is the assumption of the Risking Connection curriculum that the connection or relationship between the client and the treater is itself part of the clinical intervention. The curriculum teaches how attachment plays both a psychological and physiological role in mental health by shaping how one views relationships, and one's ability to interpret and regulate emotions.<br><u>Safety:</u> The importance of maintaining overall physical and emotional safety while establishing boundaries with others is a key component of the Risking Connection curriculum. It trains treaters how to recognise and respond to dissociative episodes and flashbacks, and how to keep a trauma framework when responding to life-threatening or other dangerous behaviours.<br><u>Transforming vicarious trauma:</u> Risking Connection training acknowledges these feelings, teaches treaters to assess their own levels of vicarious traumatisation, and to manage it with strategies such as self-care, self-nurturing activities, and healthy ways to emotionally escape. | Designed by: Saakvitne et al.<br><br>Implemented by: teachers at the residential treatment centre. It is not stated who trained the teachers, apart from that they typically train clinical and direct-care staff in residential treatment centres. | The authors define psychological trauma as occurring "when [an event or situation] overwhelms the individual's perceived ability to cope, and leaves that person fearing death, annihilation, mutilation or psychosis. The individual feels emotionally, cognitively, and physically overwhelmed. The circumstances of the event commonly include abuse of power, betrayal of trust, entrapment, helplessness, pain, confusion, and/or loss". |
| Nimura et al (2019)          | 29 inpatient psychiatric units across Tokyo, Japan                                                                      | No name assigned<br><br>Aim to improve knowledge of trauma and TIC and motivate mental health professionals to find a means of embedding TIC into their clinical practice.    | The TIC training programme consisted of a 3.5-hour lecture including a brief group discussion and 1-hour group discussion. The training programme content included definition of trauma and TIC; evidence on trauma and TIC; behavioural, social and emotional responses to traumatic events; psychiatric clinical practices evoking patient's re-traumatisation, psychiatric clinical practices corresponding to TIC, fostering trauma-informed sensibility, characteristics of trauma-informed clinical teams; group discussion content; review of clinical practices based on TIC; find a way to embed TIC into tomorrow's clinical practice.                                                                                                                                                                                                                                                                                                                                                                                                                                                                                                                                                                                                                                                                                                                                                                                                                                                                                                                                                                                                                                                                                                                                                                                                                                                  | Designed by: a Professor of Psychiatric Nursing, specialising in TIC, developed the content of the programme<br><br>Implemented by: author MK served as instructor and facilitator. Other co-authors served as co-facilitators.                     | Not specified                                                                                                                                                                                                                                                                                                                                                                                                                                 |
| Other trauma informed models |                                                                                                                         |                                                                                                                                                                               |                                                                                                                                                                                                                                                                                                                                                                                                                                                                                                                                                                                                                                                                                                                                                                                                                                                                                                                                                                                                                                                                                                                                                                                                                                                                                                                                                                                                                                                                                                                                                                                                                                                                                                                                                                                                                                                                                                   |                                                                                                                                                                                                                                                     |                                                                                                                                                                                                                                                                                                                                                                                                                                               |
| Beckett et al. (2017)        | A psychiatric inpatient ward, with a high                                                                               | No name assigned                                                                                                                                                              | The ward Clinical Nurse Consultant and Senior Clinical Psychologist devised a series of workshop sessions to raise awareness of trauma and trauma-informed care and stimulate discussions on how they might be useful in improving practice. Through these workshops, six key practice                                                                                                                                                                                                                                                                                                                                                                                                                                                                                                                                                                                                                                                                                                                                                                                                                                                                                                                                                                                                                                                                                                                                                                                                                                                                                                                                                                                                                                                                                                                                                                                                            | Designed and implemented by:                                                                                                                                                                                                                        | Not specified                                                                                                                                                                                                                                                                                                                                                                                                                                 |

|                          |                                                                                                                                                                        |                                                                                                                                                                                                                                                                                                                                |                                                                                                                                                                                                                                                                                                                                                                                                                                                                                                                                                                                                                                                                                                                                                                                                                                                                                                                                                                                                                                                                                                                                                                                                                                                                                                                                                                                                                                                                                                             |                                                                                                                                                                                                                                                                                                                                                                                                                                            |                                                                                                                                                                                                                                                                                                                                                                                                     |
|--------------------------|------------------------------------------------------------------------------------------------------------------------------------------------------------------------|--------------------------------------------------------------------------------------------------------------------------------------------------------------------------------------------------------------------------------------------------------------------------------------------------------------------------------|-------------------------------------------------------------------------------------------------------------------------------------------------------------------------------------------------------------------------------------------------------------------------------------------------------------------------------------------------------------------------------------------------------------------------------------------------------------------------------------------------------------------------------------------------------------------------------------------------------------------------------------------------------------------------------------------------------------------------------------------------------------------------------------------------------------------------------------------------------------------------------------------------------------------------------------------------------------------------------------------------------------------------------------------------------------------------------------------------------------------------------------------------------------------------------------------------------------------------------------------------------------------------------------------------------------------------------------------------------------------------------------------------------------------------------------------------------------------------------------------------------------|--------------------------------------------------------------------------------------------------------------------------------------------------------------------------------------------------------------------------------------------------------------------------------------------------------------------------------------------------------------------------------------------------------------------------------------------|-----------------------------------------------------------------------------------------------------------------------------------------------------------------------------------------------------------------------------------------------------------------------------------------------------------------------------------------------------------------------------------------------------|
|                          | dependency unit and an acute unit, New South Wales, Australia                                                                                                          | Aim to improve the quality of care provided to consumers.                                                                                                                                                                                                                                                                      | development areas were identified by staff and working teams were formed to explore these areas further: (a) reducing seclusion and restraint, (b) increasing staff confidence by improving skills in de-escalation and physical safety, (c) ensuring best practice for pharmacological interventions, (d) introducing strengths-based philosophy and practices, (e) providing sexual safety training and awareness, and (f) improving access to therapeutic activities on the ward.                                                                                                                                                                                                                                                                                                                                                                                                                                                                                                                                                                                                                                                                                                                                                                                                                                                                                                                                                                                                                        | The ward Clinical Nurse Consultant and Senior Clinical Psychologist devised a series of workshops and delivered training                                                                                                                                                                                                                                                                                                                   |                                                                                                                                                                                                                                                                                                                                                                                                     |
| Isobel et al. (2017)     | An acute mental health inpatient unit, New South Wales, Australia                                                                                                      | No name assigned<br><br>Aim to improve on the clinical needs identified by nursing staff within the potential model, based upon areas of consumer care where the nursing staff required additional support. These included, managing acute psychosis, de-escalating aggression and responding to chronic self-destructiveness. | The key principles of TIC (safety, collaboration, empowerment, trustworthiness and choice) were used to guide the development of the model. Examples of operational processes implemented in-line with these principles:<br><br>Safety: This involved prioritising psychological and physical safety for all consumers and staff.<br>Empowerment: Review of case review processes to ensure consumer advocacy and involvement in treatment planning; daily consumer led community meetings to discuss running of unit; recovery orientated language subproject to review professional communications on the unit.<br>Choice: Injection site negotiation sub project; groups and activities review subproject; purchase of increased sensory and diversionary resources.<br>Collaboration: Collaborative care planning subproject to support the standardised use of consumer led care plans; implementation of clinical care coordination structuring of nursing day to increase therapeutic engagement, consistency of care, and nurse-consumer collaboration; feedback from daily community meetings incorporated into unit meetings and planning; feedback sought from consumers and carers on experiences of care.<br>Trustworthiness: Use of consumer developed care plans and wellness plans used to lead discussion in case review; Consistency of expectations and procedures; Display of unit expectations and rules; Admission pack for consumers containing all required information about unit. | Designed and implemented by: A working group was formed to guide the development and implementation of the model. Targeted members of the unit's nursing staff were invited to join, as were other key people including an educator and a peer worker. Multidisciplinary representatives were invited to join the group in consultative and participatory roles but offers were initially declined. The group met every month on the unit. | The paper states that "TIC refers primarily to psychological trauma experienced through interpersonal dynamics including disempowerment, abuse and neglect; often repetitive and across the lifespan."                                                                                                                                                                                              |
| Jacobowitz et al. (2015) | A psychiatric hospital, providing short-term acute care in the following units: general adults, child and adolescents, older adults, chemical dependency, New York USA | No name assigned<br><br>Aim not specified                                                                                                                                                                                                                                                                                      | All levels of direct patient-care providers were encouraged to participate in regularly scheduled interdisciplinary meetings that discussed the principles of TIC and a specific patients' or multiple patients' behaviours. The meetings were of an educational nature. All staff members were introduced to the concept at orientation and at routinely scheduled intervals.<br><br>The paper states that a proprietary trauma-informed care program was part of the hospital's routine provision of patient care for several years prior to the study. No other information about the programme was provided, however.                                                                                                                                                                                                                                                                                                                                                                                                                                                                                                                                                                                                                                                                                                                                                                                                                                                                                   | Not specified                                                                                                                                                                                                                                                                                                                                                                                                                              | Trauma, defined as "a stressor that involves either witnessing a death, experiencing the threat of death, actual or threatened serious injury, or actual or threatened sexual violence. The stressor may be indirect, such as learning that a relative or close friend was exposed to the stressor and also involve repeated or extreme indirect exposure to the details of the event (APA, 2013)." |

|                                |                                                            |                                                                                                                                                                                                                                   |                                                                                                                                                                                                                                                                                                                                                                                                                                                                                                                                                                                                                                                                                                                                                                                                                                                                                                                                                                                                                                                                                                                                                                                                                                                                                                                                                                                                                                            |                                                                                                                                                                                                                                                                                                                                |                    |
|--------------------------------|------------------------------------------------------------|-----------------------------------------------------------------------------------------------------------------------------------------------------------------------------------------------------------------------------------|--------------------------------------------------------------------------------------------------------------------------------------------------------------------------------------------------------------------------------------------------------------------------------------------------------------------------------------------------------------------------------------------------------------------------------------------------------------------------------------------------------------------------------------------------------------------------------------------------------------------------------------------------------------------------------------------------------------------------------------------------------------------------------------------------------------------------------------------------------------------------------------------------------------------------------------------------------------------------------------------------------------------------------------------------------------------------------------------------------------------------------------------------------------------------------------------------------------------------------------------------------------------------------------------------------------------------------------------------------------------------------------------------------------------------------------------|--------------------------------------------------------------------------------------------------------------------------------------------------------------------------------------------------------------------------------------------------------------------------------------------------------------------------------|--------------------|
| <p>Prytherch et al. (2020)</p> | <p>A residential female crisis house, North London, UK</p> | <p>No name assigned</p> <p>Aim to provide environment reducing use of coercion as a means to manage risk, recognise importance of therapeutic relationship toward healing, in working with service users experiencing trauma.</p> | <p>The service runs on trauma-informed lines but is also open to those who have not experienced trauma. It was a women-only environment. All staff are trained and supervised in trauma-informed approaches, and initial assessments include routine inquiry about trauma. Service users were involved in the design and management of the service from the beginning. Self-referrals were accepted, and care was planned consensually by women and their workers.</p> <p>When required, medical reviews were requested from medical doctors within the crisis team. When possible, the crisis team sent a female member of staff, and when this was not possible, residents were asked whether they would be willing to meet with a man. Staff also work closely with GPs to support women to have up-to-date prescriptions.</p> <p>Staff anxieties regarding risk were managed through clear structures and procedures, and through the constant availability of other team members working together and based in the same office within the house. For further details about the crisis house see (Cooke et al. 2019).</p> <p>Women had keys to their rooms and staff only used master keys if they have knocked three times and had no response. Participants described having regular opportunities to talk to staff whom they felt were compassionate, consistent, and interested in the psychosocial context of their distress.</p> | <p>Designed by: Service-users were involved in the design and management of the service from the beginning.</p> <p>Implemented by: All staff are trained and supervised in trauma-informed approaches and so involved in implementation. However, how staff were involved in the design of the approach was not described.</p> | <p>Not stated.</p> |
|--------------------------------|------------------------------------------------------------|-----------------------------------------------------------------------------------------------------------------------------------------------------------------------------------------------------------------------------------|--------------------------------------------------------------------------------------------------------------------------------------------------------------------------------------------------------------------------------------------------------------------------------------------------------------------------------------------------------------------------------------------------------------------------------------------------------------------------------------------------------------------------------------------------------------------------------------------------------------------------------------------------------------------------------------------------------------------------------------------------------------------------------------------------------------------------------------------------------------------------------------------------------------------------------------------------------------------------------------------------------------------------------------------------------------------------------------------------------------------------------------------------------------------------------------------------------------------------------------------------------------------------------------------------------------------------------------------------------------------------------------------------------------------------------------------|--------------------------------------------------------------------------------------------------------------------------------------------------------------------------------------------------------------------------------------------------------------------------------------------------------------------------------|--------------------|

## **Six Core Strategies**

Seven studies conducted in four different settings implemented the Six Core Strategies model of TIC practice for inpatient care (47, 48, 55-57, 62, 63). The Six Core Strategies were developed with the aim of reducing seclusion and restraint in a trauma informed way (83). The underpinning theoretical framework for the Six Core Strategies is based on trauma-informed and strengths-based care with the focus on primary prevention principles.

### *Inpatient settings: child and adolescent services*

Four studies using Six Core Strategies were conducted in two child and adolescent inpatient settings using pre/post study designs (47, 48, 62, 63). Hale (2020) describes the entire process of implementing the intervention over a 6-month period and establishing a culture change by 12 months, while Azeem et al's (2015) service evaluation documents the process of implementing the six strategies on a paediatric ward in the USA over the course of ten years.

### *Inpatient settings: adult services*

Two studies focused on the use of the Six Core Strategies in adult inpatient and acute settings (55, 56). Duxbury (2019) adapted the Six Core Strategies for the UK context and developed 'REsTRAIN YOURSELF', described as a trauma-informed, restraint reduction programme, which was implemented in a non-randomised controlled trial design across fourteen adult acute and inpatient wards in seven hospitals in the UK (57).

### How does the Six Core Strategies in inpatient, crisis, emergency, and residential mental health care impact on service user outcomes?

Five studies, only one of which had a control group (57), reported a reduction in restraint and seclusion practices after the implementation of the Six Core Strategies (47, 48, 57, 62, 63). Two studies (55, 56) did not report restraint and seclusion data.

### Question 4: What is known about staff attitudes, expectations, and experiences of delivering the Six Core Strategies in inpatient, crisis, emergency, and residential mental health care?

Staff reported an increased sense of pride in ability to help people with a background of trauma (62), which came with the skills and knowledge development provided (56). Staff also showed greater empathy and respect towards service users (55, 56).

Staff recognised the need for flexibility in implementing the Six Core Strategies, and felt equipped to do this; as a result they reported feeling more fulfilled as practitioners (56). Staff shifted their perspectives on service users and improved connection with them by viewing them through a trauma lens (55). Staff also reported improved team cohesion through the process of adopting the Six Core Strategies approach (56). It was emphasised that to create a safe environment, role modelling by staff was required (55).

#### How does the Six Core Strategies impact on staff practices and staff wellbeing in inpatient, crisis, emergency, and residential mental health care?

Service users were reportedly more involved in their own care; they reviewed safety plans with staff, and were involved in their treatment planning, including decisions on medication (55, 56). Staff and service users also engaged in shared skill and knowledge building by sharing information, support, and resources on healthy coping, and trauma-informed care generally (55, 56). Staff adapted their responses to service user distress and adopted new ways of managing risk and de-escalating without using coercive practices (56, 62). Finally, service user-staff relationships were cultivated through a culture of shared learning, understanding, and trust (55).

#### How does the Six Core Strategies in inpatient, crisis, emergency and residential mental health care impact on service use and costs and what evidence exists about their cost-effectiveness?

One study reported a reduction in the duration of hospital admission (62), which was largely attributed to the reduction in the amount of documentation that staff had to complete following crisis interventions.

### **The Sanctuary Model**

Six studies, referring to five different settings (58, 67, 68, 70-72), employed the 'Sanctuary Model' (84) as a TIC model of clinical and organisational change. One further study (67) combined the 'Sanctuary Model' with 'Seeking Safety', an integrated treatment programme for substance misuse and trauma. All studies were conducted in child and adolescent residential emotional and behavioural health settings in the USA.

The Sanctuary Model is a 'blueprint for clinical and organisational change which, at its core, promotes safety and recovery from adversity through the active creation of a trauma-informed community' (84). It was developed for adult trauma survivors in short term inpatient treatment settings and has formally been adapted for a variety of settings including adolescent residential treatment programmes. No studies explored the use of the Sanctuary Model as a TIC approach in adult inpatient

or acute settings, and no studies specifically tested the efficacy of The Sanctuary Model in child and adolescent settings. Studies employing the Sanctuary Model used a range of designs including longitudinal, qualitative methods, service evaluations/descriptions and a non-randomised controlled design.

#### What is known about service user and carer expectations and experiences of The Sanctuary Model in acute, crisis and inpatient mental health care?

In a service description, Kramer (2016) reported that service users experienced clear interpersonal boundaries with staff, facilitated by healthy attachments and organisational culture. Service users also experienced staff responses as less punitive and judgemental.

#### How does The Sanctuary Model in acute, crisis and inpatient mental health care impact on service user outcomes?

Kramer (2016) described decreasing rates of absconcion, restraint, and removal of service users from the programme post-implementation of the Sanctuary Model, which the authors hypothesised was due to the safe environment, and the movement towards a culture of hope.

#### What is known about staff attitudes, expectations, and experiences of delivering The Sanctuary Model in acute, crisis and inpatient mental health care?

Staff received The Sanctuary Model positively (67, 70) and it gave them a sense of hopefulness (71). However, it was widely acknowledged that it was resource intensive for staff to implement TIC in practice and additional training may be needed (70).

Korchmaros et al., (2021) reported that the Sanctuary Model components most likely to be adopted were those that staff found most intuitive, though staff generally did not believe the model was acceptable in its entirety for their clinical setting. As staff communication improved, so did physical safety for staff and service users, and team meeting quality (71). Staff appreciated the improved safety – or perception of such – after implementing the Sanctuary Model (70, 71).

Staff reported that the Sanctuary Model promoted a healthy organisational culture with a commitment to a culture of social responsibility, social learning (68) and mutual respect (70).

#### How does The Sanctuary Model impact on staff practices and staff wellbeing in acute, crisis and inpatient mental health care?

Following implementation, staff focused more on service user recovery, through teaching service users adaptive ways of coping and encouraging empathy and compassion towards service users (70-72). Staff reported a holistic and compassionate understanding of the associations between trauma,



adversity and service user behaviour (70). Staff also reported sharing more decisions with service users (70) and collaboratively involving service users in their treatment care, safety plans, and in the development of community rules (70, 71). Staff felt able to communicate information, ideas, and their mistakes more openly, and their ability to model healthy relationships was seen as a fundamental to treatment (71).

#### How does The Sanctuary Model in acute, crisis and inpatient mental health care impact on service use and costs and what evidence exists about their cost-effectiveness?

One study reported a reduction in staff compensation claims due to a reduction in harms from physical interventions (67).

#### **Comprehensive tailored trauma informed model**

We categorised eight models (51, 53, 54, 59, 60, 73-75) as ‘comprehensive tailored TIC models’. This reflects models that are holistic and multi-faceted, but do not closely follow an established TIC intervention model or blueprint, and have instead been developed locally or to specifically complement the needs of a specific setting.

##### Residential settings: child and adolescent services

Three studies describe comprehensive tailored trauma informed models in child and adolescent residential treatment settings (51, 53, 59). At an organisational level, key features of the tailored approaches include whole staff training using a trauma-informed curriculum (51, 53, 59), creating a supportive, therapeutic environment and sense of community, using a family-centred approach, structured programmes of psychoeducational, social and skills groups (51, 59) and collaborative working across different agencies (53, 59).

##### Residential settings: adult women-only substance misuse service

Three studies (54, 74, 75) describe a gender-specific trauma-informed treatment approach in a female only environment. Key components include providing training for all staff on trauma and trauma informed approaches, team support and supervision from a trained trauma therapist, social and life skills groups (74); individual therapy and family support programme (75); trauma-informed group therapies and psychoeducation (54, 74); the implementation of a ‘gender specific, strengths based, non-confrontational, safe nurturing environment’ and strategic level meetings to identify structural barriers and gaps across different agencies (54). Zweben et al. (2017) focused specifically on family-centred treatment for women with severe drug and alcohol problems (75).

### *Inpatient settings: adults and children/adolescents*

The 'Patient Focused Intervention Model' (60) was implemented in a variety of settings including residential child and adolescent, adult acute and adult longer term inpatient stays. This model was developed using a collaborative process with involvement from service users, staff, administrators, and external collaborators with continuous quality improvement. The model incorporated i) an individual TIC treatment model, which emphasised a patient-centred approach to building a culture and environment which is soothing and healing (e.g., by making changes to the physical environment and providing animal assisted therapy), ii) the Sorensen and Wilder Associates (SWA) aggression management program (85) and iii) staff debriefing after incidents of aggression.

### *Inpatient settings: women-only forensic service*

Stamatopoulou (2019) used qualitative research methods to explore the process of transitioning to a TIC model in a female forensic mental health unit (73) using the 'trauma informed organisational change model' (86). Components included i) staff training on trauma-informed care, ii) co-produced safety planning through five sessions of Cognitive Analytic Therapy (82), iii) a daily 'Trauma Champion' role for staff, and iv) reflective practice groups for staff and service users.

### What is known about service user and carer expectations and experiences of comprehensive tailored trauma informed models in inpatient, crisis, emergency, and residential mental health care?

In a study by Tompkins & Neale (2018), service users reported being unaware that the service they were attending was trauma informed and were therefore not anticipating being encouraged to confront and reflect on their traumas (74). However, the daily structure and routine timetable created a secure environment for their treatment experience. Service users who remained engaged with the service felt cared for by staff, and that the homely atmosphere in the service supported them to feel secure.

### How do comprehensive tailored trauma informed models in inpatient, crisis, emergency and residential mental health care impact on service user outcomes?

Three studies reported data on seclusion and restraints; all indicated a decrease (53, 60, 75). Brown et al. (2013) quantitatively reported reductions in the use of both seclusion and restraint in the year following Trauma Systems Therapy implementation, and the reduction in use of physical restraints was significant and sustained over the following eight years. Goetz et al. (2012) also quantitatively reported that seclusion and restraint rates halved following implementation of the Patient Focused Intervention Model, as well as reductions in: i) staff injuries, ii) hours in seclusion and restraint and iii)

the number of aggressive patient events. However, while the number of seclusion room placements was lower, the average number of restraints among children and young people was higher in TIC compared to usual care.

Using a pre-post design, Zweben et al. (2017) reported that service users receiving TIC reported fewer psychological and emotional problems after a month, compared to on entry to the programme, as well as reduced drug and alcohol misuse. Service user average length of stay was higher among those in the programme, compared to those not enrolled. Finally, as court and protective services became aware of the service users' improvements, reunifications with children approached 100%.

#### What is known about staff attitudes, expectations, and experiences of delivering comprehensive tailored trauma informed models in inpatient, crisis, emergency, and residential mental health care?

Two papers reported on staff attitudes and experiences. Some staff experienced introduction of TIC as overwhelming, leaving them feeling unsure about what was expected from them throughout the training and implementation process, and that it might have been more successful had it been implemented in stages (73). Some staff also felt unsure of what TIC entailed even after training, and it took time for staff to feel competent and confident (74). Staff who had the least awareness of TIC experienced the greatest change anxiety when they were told of its implementation. When there were conflicting views within the team, the consistency of implementation was reduced (73). Conversely, however, staff reported a sense of achievement in having implemented TIC and consequently an increased sense of job satisfaction. Goetz et al. (2012) also reported reduced staff injuries in the first year after implementing TIC.

Staff reported that their own traumatic experiences can inform the way they communicate and react to situations in the clinical environment, and they needed help to set boundaries and avoid emotional over involvement (74). Implementing TIC broke down barriers between their private and professional selves, and there was an increased awareness of the personal impact of their work.

#### How do comprehensive tailored trauma informed models impact on staff practices and staff wellbeing in inpatient, crisis, emergency, and residential mental health care?

Stamatopoulou (2019) reported that with the introduction of TIC, staff moved away from a solely diagnosis-based understanding of distress and developed an ability to formulate connections between service users' backgrounds and their clinical presentations. As a result, staff showed empathy and respect towards service users and approached sensitive situations with service users more mindfully. Staff adopted new ways of managing risk (73) and service users were collaboratively involved in the development of treatment care plans (74).

There was an increased focus on staff wellbeing as well as greater awareness of staff personal boundaries and experiences of trauma and adversity, which led to staff feeling as though they had more in common with service users than expected (73). Staff also discussed the importance of protecting their wellbeing by maintaining personal and professional boundaries, practicing mindfulness, and attending mutual aid groups (74).

Wider group relationships were reportedly redefined, and the impact of the work on staff wellbeing was acknowledged, specifically the ways in which staff's own trauma informed their reactions to incidents on the ward (73). Staff reported a greater sense of team connectedness, and that their individual professional identities were reconstructed.

#### How do comprehensive tailored trauma informed models in inpatient, crisis, emergency and residential mental health care impact on service use and costs and what evidence exists about their cost-effectiveness?

Staff had concerns over the sustainability of the model, especially in an organisation that could not offer the time or money required for service development (73). Fidelity to a model varied depending on which staff were working; for instance, when agency staff or new joiners were working, fidelity was low and crisis incidents increased.

Adolescents in residential treatment receiving TIC spent significantly less time in treatment compared to those receiving traditional treatment, with the receipt of trauma informed psychiatric residential treatment (TI-PRT) accounting for 25% of the variance in length of stay (51). Similarly, authors observed reduced length of hospital admissions after the introduction of their TIC approach (59).

#### **Safety focused tailored trauma-informed models**

Two studies (50, 52) tailored their own trauma-informed approach to create a culture of safety and i) reduce restrictive practices and ii) staff injuries. A third study (66) utilised a Trauma and Self Injury (TASI) programme, which was developed in the National High Secure Service for Women.

#### *Inpatient settings: adults and child/adolescent services*

Blair et al. (2017) conducted a pilot trauma-informed intervention study with the aim of reducing seclusions and restraints in a psychiatric inpatient hospital facility. Intervention components included the use of Broset Violence Checklist (BVC) (87-89); 8-hour staff training in crisis intervention; two-day training in "Risking Connections" (90); formal reviewing of restraint and seclusion incidents; environmental enhancements; and individualised plans for service users.

Borckardt et al (2011) reported a ‘trauma informed care engagement model’ to reduce restraint and seclusion across five various inpatient units (acute, child and adolescent, geriatric, general and a substance misuse unit). The intervention components included TIC training, changes in rules and language to be more trauma-sensitive, patient involvement in treatment planning and physical changes to the environment.

#### *Inpatient settings: women-only forensic service*

Jones (2021) reported the TASI programme in a high security women’s inpatient hospital, which aimed to manage trauma and self-injury with a view to reducing life threatening risks to service users and staff. The programme: i) promotes understanding of trauma through staff training, staff support and supervision on the wards, ii) provides psychoeducation and wellbeing groups for service users, iii) focuses on the improvement of the therapeutic environment, iv) promotes service users’ ability to cope with their distress, and v) provides individual and group therapy.

#### What is known about service user and carer expectations and experiences of safety focused tailored trauma-informed models in inpatient, crisis, emergency, and residential mental health care?

In Jones (2021), some women reported feeling initially overwhelmed by and underprepared to acknowledge and work on their trauma experiences, and sometimes felt their distress was misunderstood by the nurses in their setting, which could lead to an escalation (66). Service users felt connected to themselves, to feel safe and contained, particularly in comparison to previous inpatient experiences. Overall, however, the service did not make the women feel as though their problems were fully understood.

#### How do safety-focused tailored trauma-informed models in inpatient, crisis, emergency, and residential mental health care impact on service user outcomes?

Reductions in the number of seclusions and restraint were reported (50, 52). Specifically, the trauma informed change to the physical therapeutic environment was associated with a reduction in the number of both seclusion and restraint (52). The duration of restraints reportedly increased, while duration of seclusion decreased (50).

#### What is known about staff attitudes, expectations, and experiences of delivering safety focused tailored trauma-informed models in inpatient, crisis, emergency, and residential mental health care?

In Jones (2021), nurses emphasised that shared understanding and trust were instrumental in connecting and communicating with the women in their service (66). Nurses also cultivated service

user-staff therapeutic relationships, which they experienced as intensely emotional. The nurses reported becoming more critical of other staff members they perceived as lacking compassion towards the service users. Finally, staff felt that a barrier to the nurse-service user relationship was the staff's inability to share personal information and vulnerability back to the service user.

#### How do safety focused tailored trauma-informed models impact on staff practices and staff wellbeing in inpatient, crisis, emergency, and residential mental health care?

Staff developed new tools and adapted their responses to trauma and distress, and service users were also involved in some, but not all, staff training (66). There were changes to information sharing practices (73); information on service users' history and intervention plans were more openly shared within the team to ensure all staff had the same information and did not need to risk re-traumatising service users by asking for information again. Service users also reported being more involved in their treatment planning (52, 56) and medication decisions (55).

#### **Trauma informed training intervention**

Three studies focused on trauma informed training interventions for staff (46, 61, 69). All studies used a pre/post design to evaluate effectiveness.

#### Residential settings: child and adolescent services

Gonshak (2011) reported on a specific trauma-informed training programme called Risking Connections (90) implemented in a residential treatment centre for children with 'severe emotional disabilities'. Risking Connections is a training curriculum for working with survivors of childhood abuse and includes i) an overarching theoretical framework to guide work with trauma and abuse ii) specific intervention techniques iii) a focus on the needs of trauma workers as well as those of their clients.

#### Inpatient settings: adult services

Nimura (2019) reported a 1-day TIC training intervention, covering items including the definition of trauma, evidence on trauma and behavioural, social, and emotional responses to traumatic events, on attitudes of staff in a psychiatric hospital setting. Aremu (2018) reported a training intervention to improve staff engagement which they identified as a key component of TIC. The intervention was a 2-hour training on engaging with patients, however the specific content of the training is not specified.

#### What is known about staff attitudes, expectations, and experiences of delivering trauma informed training interventions in inpatient, crisis, emergency, and residential mental health care?

Following training, half of staff reported feeling their skills or experience were too limited to implement changes and also that staff experienced difficulties when trying to share the principles of trauma informed care with untrained staff (69). However, TIC training did produce positive attitude shifts towards TIC.

#### How do trauma informed training interventions impact on staff practices and staff wellbeing in inpatient, crisis, emergency, and residential mental health care?

Staff modified their communication with service users by altering their tone and volume, and adopted new ways of managing risk without using coercive practices (69). There was also a reported a reduction in the use of as-needed medication (46).

#### How do trauma informed training interventions in inpatient, crisis, emergency, and residential mental health care impact on service use and costs and what evidence exists about their cost-effectiveness?

One study reported that educating staff about TIC in residential settings was time intensive and may require frequent or intense "booster" sessions following the initial training (61). In terms of evaluation, it took time to implement TIC in the residential setting and then to collect related outcome data.

### **Other TIC models**

This category reports studies which have made attempts to shift the culture towards trauma-informed approaches but have not made full-scale clinical and organisational changes to deliver a comprehensive trauma-informed model (28, 49, 64, 65).

#### *Inpatient settings: adult services*

Isobel and Edwards' (2017) case study on an Australian inpatient acute ward described TIC 'as a nursing model of care in acute inpatient care'. This intervention was specifically targeted at nurses working on acute inpatient units but did not involve members of the multi-disciplinary team.

Beckett (2017) conducted a TIC improvement project on an acute inpatient ward (which primarily received admissions through the hospital emergency department) using workforce development and a participatory methodology. Staff devised workshops on trauma-informed approaches, through which six key practice areas were identified for improvement by the staff team.

Jacobowitz et al (2015) conducted a cross-sectional study in acute psychiatric inpatient wards to assess the association between TIC meetings and staff PTSD symptoms, resilience to stress, and compassion

fatigue. Neither the content nor the structure of the ‘trauma-informed care meetings’ were described in further detail.

### Crisis house setting

Prytherch, Cooke & March’s (2020) qualitative study of a ‘trauma informed crisis house’, based in the UK, gives a partial description of how trauma-informed approaches were embedded in the service delivery and design.

### What is known about service user and carer expectations and experiences of other TIC models in inpatient, crisis, emergency, and residential mental health care?

Prytherch, Cooke and March (2020) reported that their TIC model created a positive experience for service users by making them feel worthwhile, respected and heard by staff (28). Service users valued being trusted by staff, for example, to have their own room keys and to maintain their social and occupational roles, which were a key source of self-worth. While service user experiences were often positive, they found being asked directly about trauma challenging. This was invalidating for those who did not initially identify as having experienced trauma. Some service users also felt the TIC programme could only support them so far, as it did not incorporate or address wider societal injustices, such as issues related to housing and benefits, that can contribute to and exacerbate distress.

### How do other TIC models in inpatient, crisis, emergency, and residential mental health care impact on service user outcomes?

Beckett et al. (2017) reported that in the three years after the TIC workshops, rates of seclusion dropped by 80%, as did the length of time spent in seclusion, with most seclusions lasting less than an hour.

### What is known about staff attitudes, expectations, and experiences of delivering other TIC models in inpatient, crisis, emergency, and residential mental health care?

Staff found an increased sense of confidence and motivation in managing emotional distress and behavioural disturbance (49). Staff also showed increased respect, understanding and compassion towards service users.

Similarly, staff expressed hope for improved care in future, on the basis that they were better skilled to deliver care that was consistent and cohesive, while also being individual and flexible (64). They reported a need for clarity and consistency in their role expectations and felt that changes in practice needed to be introduced slowly and framed positively. Conversely, others felt the changes introduced



were too minimal to be significant and did not much vary from existing practice. Some staff expressed a fear of reduced safety that could follow changes to longstanding practice. Ambivalence to change stemmed from different degrees of understanding of TIC among staff, and others felt personally criticised by the newly introduced approach, specifically that their previous practice had been labelled traumatising.

#### How do other TIC models impact on staff practices and staff wellbeing in inpatient, crisis, emergency, and residential mental health care?

Some staff modified their communication with service users, e.g., reducing clinical jargon and focusing on the strengths of the service users (49). Regular opportunities for service users and staff to discuss and reflect on information, concerns, and experiences were established. Staff received training in physical safety and de-escalation procedures; subsequently, the need for security staff on the ward decreased. Finally, in terms of staff wellbeing, staff PTSD symptoms increased with an increase in signs of burnout and length of time between attending trauma-informed care meetings (65).

#### Implementation of TIC

##### What are the reported difficulties in implementing TIC?

Challenges to successful implementation included uncertainty, ambivalence and lack of interest in TIC from staff members (64, 69, 73), a lack of time (71), low readiness to change (66) and a lack of enthusiasm and commitment by staff (72), alongside power imbalances between staff and service users (66). Additional challenges included inadequate TIC knowledge among staff, the provision of staff training around TIC (particularly the delivery of additional training for new starters), and the implementation of staff supervision (70, 71, 74); these barriers arose as a result of insufficient time and money to support service development (73). At times there was a lack of understanding of TIC among staff, and a feeling that some models were vague (e.g., The Sanctuary model) (70). Practice changes in relation to staff working with families, and not attributing blame or increasing their feelings of guilt, was noted as challenging (72).

There were also longer-term concerns. Stamatopoulou et al. (2019) reported that TIC required significant resources, which may be draining in the long term, particularly as these services are likely to already be struggling to secure the limited resources available to them. Services may prefer instead to implement approaches which are less resource intensive to embed within their existing service structures. Similarly, maintaining the presence of a stable and well-trained team around TIC in the long term is challenging during periods of staff absence and high staff turnover (70); a key principle of TIC is to provide consistency to service users (74).

### What is required to implement TIC effectively?

Senior staff buy-in and commitment and enthusiasm about TIC was deemed a critical first step for successful implementation (72). Slow, positively framed, and well-managed implementation is necessary to allow for a smooth transition to TIC, and staff and service users benefit from having clearly defined staff roles within TIC services (64). Positive role modelling by senior staff, such as a ward manager, was also key for successful implementation (55).

The provision of high-quality TIC training for existing staff and new starters was noted as integral to implementation (70, 71, 74). Staff must then be given sufficient time to become competent and feel comfortable delivering TIC, while ongoing support, mentoring and supervision is delivered to strengthen the development and maintenance of TIC skills (74). Specialist training to provide, for example, gender-sensitive (54) and culturally-sensitive services (49) may also result in a better adapted service. The presence of consistent, trained staff helped to support regular delivery of TIC to service users (73). TIC implementation can be further supported through peer support among staff, for example providing reflective and debrief spaces (73) and peer learning (56, 63).

Finally, it was suggested that during staff recruitment, it may be pertinent to consider each candidate's background and experiences, and how these may complement the needs of the service users within each individual service, e.g., female staff with personal experiences which mirror those of the women in the service, or female staff who had worked with a similar service user group previously (74).

Table 3 Results table

| Author(s) and year                                             | Type of report/ Study design                     | Population (Staff or services user)<br><br>Sample size       | Participant characteristics: Age, race, sex, other                                                                                                                                                                                                                   | Service user: Mental health problem/ diagnosis<br><br>Length of stay:                                                                                                                                                                                                                                        | Trauma experiences (N and %) | Staff role and length of service | Results: Individual outcomes                                                                                                                                                                                                                                                                                                                                                                                                                                                                                                                                                                                                                                                                                                                                                                                                                                                                                                       | Results: Interpersonal outcomes | Results: Service level outcomes | Results: System level outcomes |
|----------------------------------------------------------------|--------------------------------------------------|--------------------------------------------------------------|----------------------------------------------------------------------------------------------------------------------------------------------------------------------------------------------------------------------------------------------------------------------|--------------------------------------------------------------------------------------------------------------------------------------------------------------------------------------------------------------------------------------------------------------------------------------------------------------|------------------------------|----------------------------------|------------------------------------------------------------------------------------------------------------------------------------------------------------------------------------------------------------------------------------------------------------------------------------------------------------------------------------------------------------------------------------------------------------------------------------------------------------------------------------------------------------------------------------------------------------------------------------------------------------------------------------------------------------------------------------------------------------------------------------------------------------------------------------------------------------------------------------------------------------------------------------------------------------------------------------|---------------------------------|---------------------------------|--------------------------------|
| The Six Core Strategies                                        |                                                  |                                                              |                                                                                                                                                                                                                                                                      |                                                                                                                                                                                                                                                                                                              |                              |                                  |                                                                                                                                                                                                                                                                                                                                                                                                                                                                                                                                                                                                                                                                                                                                                                                                                                                                                                                                    |                                 |                                 |                                |
| Azeem, Aujla, Rammerth, Binsfeld, and Jones (2011)<br><br>(47) | Cluster-randomised, controlled, cross-over trial | Population: Service users<br><br>N=458 records were reviewed | Age: Mean age of service users who experienced seclusion/restraint: 14.4 years<br>Range: 8–17 years<br><br>Ethnicity: Caucasian: 63.3%<br>African American: 12.6%<br>Native Americans: 8.9%<br>Hispanics: 6.3%<br>Other: 8.3%<br><br>Sex: Women: n=276<br>Men: n=182 | Disruptive behaviour disorders (ADHD, ODD, and conduct disorder): 61%<br><br>Other disorders including mood disorders: 52%<br>Reactive attachment disorder: 24%<br>Psychotic disorders: 16%<br>Anxiety disorders: 18%<br>SUDS: 16%<br>Pervasive developmental disorders: 14%<br>Intellectual disability: 14% | Not stated                   | Not stated                       | Over the study period, n=79 (17.2%) service users (n=44 women, n=35 men) required seclusion and/or restraint.<br><br>Of the 79 service users who experienced seclusion and/or restraint, 25 (32%) experienced 3 or more incidents. Service users involved in 3 or more restraint or seclusion incidents had a longer average length of stay in the services (85 days) versus service users involved in fewer than 3 incidents of restraint or seclusion (64 days).<br><br>In the six months before the TIC training, the number of restraints and seclusions was 93 (73 seclusions, 20 restraints). These involved 22 service users (n=11 women, n=11 men).<br><br>In the six months after TIC training, the number of restraints and seclusions was 31 (6 seclusions, 25 restraints) involving 11 service users (n=7 women, n=4 women).<br><br>There were higher rates of disruptive behaviour disorders and mood disorders among | None measured                   | None measured                   |                                |

|                                                                     |                                                |                                                                            |                                                                                                                                                                                                                                                                                                                                                                              |                                                                                                      |            |                                                                                                                                                                                                                         |                                                                                                                                                                                                                                                                                                                                                         |               |                                                                                                    |               |
|---------------------------------------------------------------------|------------------------------------------------|----------------------------------------------------------------------------|------------------------------------------------------------------------------------------------------------------------------------------------------------------------------------------------------------------------------------------------------------------------------------------------------------------------------------------------------------------------------|------------------------------------------------------------------------------------------------------|------------|-------------------------------------------------------------------------------------------------------------------------------------------------------------------------------------------------------------------------|---------------------------------------------------------------------------------------------------------------------------------------------------------------------------------------------------------------------------------------------------------------------------------------------------------------------------------------------------------|---------------|----------------------------------------------------------------------------------------------------|---------------|
|                                                                     |                                                |                                                                            |                                                                                                                                                                                                                                                                                                                                                                              | Length of stay of those who experienced seclusion/restraint: average: 70.6 days (range 11–177 days). |            |                                                                                                                                                                                                                         | service users who experienced seclusions or restraints, versus those who did not experience seclusions or restraints.                                                                                                                                                                                                                                   |               |                                                                                                    |               |
| Azeem, Reddy, Wudarsky, Carabetta, Gregory & Sarofin (2015)<br>(48) | Description of service implementation          | Population: Service users<br><br>Sample size: 2005 – n=178<br>2014 – n=162 | Service users:<br><br>Age:<br>Not specified, but it is a paediatric hospital,<br><br>Race:<br>2005 (n=178)<br>Caucasian 38%<br>African American 34%<br>Hispanic 27%<br>Other 1%<br>2014 (n=162),<br>Caucasian 40%,<br>African American 30%<br>Hispanic 26%<br>Other 4%.<br><br>Sex:<br>2005 (n=178)<br>Male: 51%<br>Female: 49%.<br>2014 (n=162)<br>Male: 46%<br>Female: 54% | Not stated                                                                                           | Not stated | Hospital Executive leaders; including the Superintendent, Assistant Superintendent, Medical Director, Director of Nursing, and Director of Clinical Operations), childcare workers, nurses, clinicians, and physicians. | Mechanical restraints (i.e. restraining service users to restraint beds) decreased by 100% from 485 incidents in 2005 to “zero” in 2014 for 3 years consecutive years in 2012, 2013, and 2014.<br><br>Physical restraints, whereby staff physically restrict the service users’ movement, decreased by 88% from 3,033 incidents in 2005 to 379 in 2014. | None measured | None measured                                                                                      | None measured |
| Duxbury (2019)<br>(57)                                              | Cross-site study, including process evaluation | Population: N/A<br><br>Intervention wards (n=144)                          | Participant characteristics: N/A<br><br>Primarily mixed gender wards,                                                                                                                                                                                                                                                                                                        | Length of stay: around 15 days                                                                       | Not stated | Not stated                                                                                                                                                                                                              | None measured                                                                                                                                                                                                                                                                                                                                           | None measured | Restraint rates: Average reduction of physical restraint rates across the intervention wards: 22%. | None measured |

|                             |                                      |                                                                                         |                                                                                                    |     |            |                                                                     |                                                                                                                                                                                                                                              |                                                                                                                                         |                                                                                                                                                                                                                                                                                                                                                                                                                                                                                                                                                                                                                                                                                                                                                                                                                                           |                                                                                                                                                                                         |
|-----------------------------|--------------------------------------|-----------------------------------------------------------------------------------------|----------------------------------------------------------------------------------------------------|-----|------------|---------------------------------------------------------------------|----------------------------------------------------------------------------------------------------------------------------------------------------------------------------------------------------------------------------------------------|-----------------------------------------------------------------------------------------------------------------------------------------|-------------------------------------------------------------------------------------------------------------------------------------------------------------------------------------------------------------------------------------------------------------------------------------------------------------------------------------------------------------------------------------------------------------------------------------------------------------------------------------------------------------------------------------------------------------------------------------------------------------------------------------------------------------------------------------------------------------------------------------------------------------------------------------------------------------------------------------------|-----------------------------------------------------------------------------------------------------------------------------------------------------------------------------------------|
|                             |                                      | beds, mean= 20.1 beds per ward)<br>Control wards (n=147 beds, mean= 21.0 beds per ward) | in the intervention and control wards there were 2 female-only wards and 1 male-only ward in each. |     |            |                                                                     |                                                                                                                                                                                                                                              |                                                                                                                                         | <p>Rate of restraints was significantly lower on the intervention wards in the adoption phase (6.62 events/1000 bed-days, 95% CI 5.53-7.72) compared to baseline (9.38, 95% CI 8.19-10.55).</p> <p>There was a temporary increase in restraint rates on the intervention wards during implementation (10.76, 95% CI 9.34-12.19) prior to the decrease observed in the adoption phase.</p> <p>There were no changes in rates of restraint on the control wards over the same period (baseline: 5.33, 95% CI 4.45-6.20; implementation: 5.65, 95% CI 4.62-6.67; adoption: 7.22, 95% CI 6.01-8.42).</p> <p>The association between control versus implementation wards, and study phase, was significant (chi-squared=39.15, df=13 p&lt;.0002) There was a 62% reduction in restraint on implementation wards compared to control wards.</p> |                                                                                                                                                                                         |
| Chandler (2008)<br><br>(55) | Qualitative descriptive study design | Population: Staff<br><br>N=10                                                           | Not stated                                                                                         | N/A | Not stated | 8 nurses and counsellor providers volunteered to participate, and 2 | Staff reported a gradual change of perspective regarding patient behaviour after learning more about trauma and its effects on service user behaviour. Perspective shifts were reinforced by nurse manager role models, who believed in TIC. | Collaboration was the basis of symptom management.<br><br>Staff described that they changed their perspectives, developed collaborative | None measured                                                                                                                                                                                                                                                                                                                                                                                                                                                                                                                                                                                                                                                                                                                                                                                                                             | There was a culture shift, moving control from staff to the patient. Creating a structure of active administrative involvement, staff development, skills training, and staffing ratios |

|  |  |  |  |  |                                                                                                                                                       |                                                                                                                                                                                                                                                                                                                                                                                                                                                                                                                                                                                                                                                                                                                                                                                                                                                                                                                                                                          |                                                                                                                                                                                                                                                                                                                                                                                                                                                                                                                                                                                                                       |
|--|--|--|--|--|-------------------------------------------------------------------------------------------------------------------------------------------------------|--------------------------------------------------------------------------------------------------------------------------------------------------------------------------------------------------------------------------------------------------------------------------------------------------------------------------------------------------------------------------------------------------------------------------------------------------------------------------------------------------------------------------------------------------------------------------------------------------------------------------------------------------------------------------------------------------------------------------------------------------------------------------------------------------------------------------------------------------------------------------------------------------------------------------------------------------------------------------|-----------------------------------------------------------------------------------------------------------------------------------------------------------------------------------------------------------------------------------------------------------------------------------------------------------------------------------------------------------------------------------------------------------------------------------------------------------------------------------------------------------------------------------------------------------------------------------------------------------------------|
|  |  |  |  |  | <p>administrators volunteered.</p> <p>Day shift staff: n=8<br/>Evening staff: n=1<br/>Night shift: n=1</p> <p>Length of service: minimum 12 years</p> | <p>relationships with service users, implemented safety protocols, and used educational resources.</p> <p>Staff perceived that service users saw others as able to support and help one another to manage their symptoms and cultivate coping skills.</p> <p>Service users share the community services that work well for them and refer others to successful outpatient programs. Patient networks are key, and now policy has evolved to support patient contact post-discharge, if they want to continue relationships formed in the unit.</p> <p>There was an emphasis on a less confined physical environment for service users, which has led to units being combined. Service users with substance abuse, mental health, and PTSD are in the same unit, along with older service users and those who are physically unwell, and those who are potentially aggressive. Service users are not separated by diagnosis. Staff have therefore worked to create an</p> | <p>was required to ensure that staff could implement TIC.</p> <p>The relationship hierarchy shifted with the introduction of TIC, as they empowered service users to have control over their lives.</p> <p>Service users and staff have additional opportunities to collaborate on medication and treatment decisions.</p> <p>An appropriate staffing ratio is key for maintain safety, as well as staff engaging with relevant professional development programmes.</p> <p>Educational plans that include developing the patient's knowledge about their symptoms and skills training for coping were developed.</p> |
|--|--|--|--|--|-------------------------------------------------------------------------------------------------------------------------------------------------------|--------------------------------------------------------------------------------------------------------------------------------------------------------------------------------------------------------------------------------------------------------------------------------------------------------------------------------------------------------------------------------------------------------------------------------------------------------------------------------------------------------------------------------------------------------------------------------------------------------------------------------------------------------------------------------------------------------------------------------------------------------------------------------------------------------------------------------------------------------------------------------------------------------------------------------------------------------------------------|-----------------------------------------------------------------------------------------------------------------------------------------------------------------------------------------------------------------------------------------------------------------------------------------------------------------------------------------------------------------------------------------------------------------------------------------------------------------------------------------------------------------------------------------------------------------------------------------------------------------------|

|                      |                                                                                                       |                                                  |                                       |            |            |                                                                                                                                                                                                                                                                                                                          |                                                                                                                                                                                                                                                                                                                                                                                                                                                                                                                                                                                                                                                                           |                                                                                                                                                                                                                                                                                                                                                                                                                                                                   |                                                                                                                                                                                                                                                                    |                                                                                                                                                                                                                                                                                                                                                                                                                                                                                                                                       |
|----------------------|-------------------------------------------------------------------------------------------------------|--------------------------------------------------|---------------------------------------|------------|------------|--------------------------------------------------------------------------------------------------------------------------------------------------------------------------------------------------------------------------------------------------------------------------------------------------------------------------|---------------------------------------------------------------------------------------------------------------------------------------------------------------------------------------------------------------------------------------------------------------------------------------------------------------------------------------------------------------------------------------------------------------------------------------------------------------------------------------------------------------------------------------------------------------------------------------------------------------------------------------------------------------------------|-------------------------------------------------------------------------------------------------------------------------------------------------------------------------------------------------------------------------------------------------------------------------------------------------------------------------------------------------------------------------------------------------------------------------------------------------------------------|--------------------------------------------------------------------------------------------------------------------------------------------------------------------------------------------------------------------------------------------------------------------|---------------------------------------------------------------------------------------------------------------------------------------------------------------------------------------------------------------------------------------------------------------------------------------------------------------------------------------------------------------------------------------------------------------------------------------------------------------------------------------------------------------------------------------|
|                      |                                                                                                       |                                                  |                                       |            |            |                                                                                                                                                                                                                                                                                                                          |                                                                                                                                                                                                                                                                                                                                                                                                                                                                                                                                                                                                                                                                           | environment that encourages relational connections.                                                                                                                                                                                                                                                                                                                                                                                                               |                                                                                                                                                                                                                                                                    |                                                                                                                                                                                                                                                                                                                                                                                                                                                                                                                                       |
| Chandler (2012) (56) | Qualitative case study of one inpatient unit                                                          | Population: Staff<br>N=11                        | Not stated<br><br>female=7<br>male= 4 | Not stated | Not stated | Staff roles:<br>Nurses: n=3<br>Mental health counsellors : n=3<br>Occupational Therapist: n=1<br>Occupational Therapist aide: n=1<br>Administrators: n=3<br><br>Years of experience:<br>Nurses: 2-20 years<br>Mental health counsellors : 6-25 years<br>OT: 10 years<br>OT aide: 2<br>Administrators: more than 20 years | Staff developed a new perspective on service users' experiences of PTSD after learning about trauma and its impacts on behaviour.<br><br>Staff approached service user behaviours, such as self-injury, in a calm and non-punitive way.<br><br>The leadership philosophy that influenced day-to-day staff decisions was to remain interested and engaged with service users' lives.<br><br>Staff and service users were able to develop their trauma-related knowledge and skills, and receive recognition for their engagement.<br><br>The nurses, counsellors, and OT reported that they needed to be flexible in order to respond appropriately to service user needs. | Staff were able to raise their safety concerns, and the day-to-day impact of TIC supported them to create a cohesive team.<br><br>Developing trusting relationships with patients was a foundational principle of TIC in this setting. Service users feeling understood by staff begins on admission.<br><br>Staff-staff relationships were essential to develop treatment plans. The team works with the service users to develop comprehensive treatment plans. | The occupational therapist now performs a sensory assessment with service users to identify individual sensorimotor preferences and to increase service users' awareness of their physical responses to challenging situations, and to develop personalised plans. | To involve all staff in TIC training, a retreat and a series of compulsory trainings on TIC, were conducted.<br><br>Meetings facilitated collaboration between staff and leadership and during each shift this provided the support required for the sensitive, intensive nature of the work to create a secure environment.<br><br>Service user groupwork added to the safety plans by providing support for recovery, as they supported service users to identify their treatment goals, and work on their self-soothing practices. |
| Hale (2019) (62)     | Non-randomised controlled trial (this paper reports only on outcomes of physical restraint reduction) | Population: Staff<br><br>Sample size: Not stated | Service users:<br>Age: Range 3-17     | Not stated | Not stated | Physicians, nurse practitioners, nurses, behavioural health technicians, therapists, dietary staff, and ancillary staff who                                                                                                                                                                                              | Crisis interventions before TIC implementation: n=440<br>Crisis interventions after TIC implementation: n= 259<br><br>Seclusions before TIC implementation: n=215<br>Seclusions after TIC implementation: n=125<br><br>Restrains before TIC implementation: n=225                                                                                                                                                                                                                                                                                                                                                                                                         | Staff reported strategies for de-escalation: using their tone of voice, distraction and eye contact.<br><br>Staff attitudes: Staff reported a sense of pride knowing they are able to support service users who have experienced trauma,                                                                                                                                                                                                                          | Psychiatrists and nurse practitioners, reported less need for documenting crisis interventions that may increase a patient's length of stay in the service and which may interfere with medication management.                                                     | The physical hold and seclusion policy was updated to ensure all crisis interventions were reported. Leadership committed to analysis of restraint and seclusion data to extract trends e.g., the time of day, staff involved.<br><br>Staff compared monthly restraint and seclusion data                                                                                                                                                                                                                                             |

|  |  |  |  |  |  |                                          |                                                                                                                                                       |                                                                                                                                              |  |                                                                                                                                                                                                                                                                                                                                                                                                                                                                                                                                                                                                                                                                                                                                                                                                                                                                                                                                                                                                                                                                                        |
|--|--|--|--|--|--|------------------------------------------|-------------------------------------------------------------------------------------------------------------------------------------------------------|----------------------------------------------------------------------------------------------------------------------------------------------|--|----------------------------------------------------------------------------------------------------------------------------------------------------------------------------------------------------------------------------------------------------------------------------------------------------------------------------------------------------------------------------------------------------------------------------------------------------------------------------------------------------------------------------------------------------------------------------------------------------------------------------------------------------------------------------------------------------------------------------------------------------------------------------------------------------------------------------------------------------------------------------------------------------------------------------------------------------------------------------------------------------------------------------------------------------------------------------------------|
|  |  |  |  |  |  | <p>work in admissions and reception.</p> | <p>Restraints after TIC implementation: n=134</p> <p>Use of physical holds and seclusions decreased by 26% within 6 months of TIC implementation.</p> | <p>and they reported knowing that TIC has been successful in other settings and believe they can make the same changes in their setting.</p> |  | <p>in this setting to others. Seclusion and restraint data was made available to staff and service users, and used to evaluation adoption of the intervention of each floor of the service. Staff were recognised for showing effective de-escalation techniques each month in an 'all-star' programme.</p> <p>Following TIC, yearly teaching for all staff regarding seclusion and restraint was mandatory. Staff must attend an annual refresher that emphasises de-escalation techniques. TIC was featured on all staff job descriptions and yearly evaluation.</p> <p>Revisions to assessment tools included trauma and aggression histories for completion on admission. During the admission assessment, crisis interventions were introduced to the service users. Each floor had a comfort room, allowing service users in crisis to go to a space that provides a calm environment.</p> <p>Patient advocates who were on-site five days a week, were introduced. They responded to all concerns and supported the service user and their family. A milieu coordinator was</p> |
|--|--|--|--|--|--|------------------------------------------|-------------------------------------------------------------------------------------------------------------------------------------------------------|----------------------------------------------------------------------------------------------------------------------------------------------|--|----------------------------------------------------------------------------------------------------------------------------------------------------------------------------------------------------------------------------------------------------------------------------------------------------------------------------------------------------------------------------------------------------------------------------------------------------------------------------------------------------------------------------------------------------------------------------------------------------------------------------------------------------------------------------------------------------------------------------------------------------------------------------------------------------------------------------------------------------------------------------------------------------------------------------------------------------------------------------------------------------------------------------------------------------------------------------------------|



|                                       |                               |                                                     |             |            |                                                                |            |                                                                                                                                                                                                                                                                                                                                                                                                                                                                                                                      |                                                                                                                           |                                                                                                                                                              |                                                                                                                                                                                                                                                                                                                                                                     |
|---------------------------------------|-------------------------------|-----------------------------------------------------|-------------|------------|----------------------------------------------------------------|------------|----------------------------------------------------------------------------------------------------------------------------------------------------------------------------------------------------------------------------------------------------------------------------------------------------------------------------------------------------------------------------------------------------------------------------------------------------------------------------------------------------------------------|---------------------------------------------------------------------------------------------------------------------------|--------------------------------------------------------------------------------------------------------------------------------------------------------------|---------------------------------------------------------------------------------------------------------------------------------------------------------------------------------------------------------------------------------------------------------------------------------------------------------------------------------------------------------------------|
|                                       |                               |                                                     |             |            |                                                                |            |                                                                                                                                                                                                                                                                                                                                                                                                                                                                                                                      |                                                                                                                           |                                                                                                                                                              | <p>established to act as a buffer between staff and service users.</p> <p>The debriefing process was improved; all staff involved in the incident were present, learnings from the incident were prioritised, treatment plans were updated, and adherence to procedures were reviewed via body camera footage. Service users were not involved in this process.</p> |
| Hale & Wendler (2020)<br><br>(63)     | Service change description    | Population: Service users<br><br>Sample size: N/A   | Not stated. | N/A        | N/A                                                            | N/A        | <p>Seclusion:<br/>Before TIC implementation: n=215<br/>After TIC implementation: n= 125<br/>Difference: n= -41.86%</p> <p>Restraint<br/>Before implementation: n=225<br/>After Implementation: n= 134<br/>Difference: n= 40.44%</p> <p>Overall reduction in crisis interventions of holds and seclusions of more than 41%.</p> <p>Data at one year demonstrated a further reduction of holds and seclusions by 9.3%.</p> <p>Crisis interventions continued to decrease, with a 4% lessening at 1 year follow-up.</p> | None measured                                                                                                             | None measured                                                                                                                                                | None measured                                                                                                                                                                                                                                                                                                                                                       |
| The Sanctuary Model                   |                               |                                                     |             |            |                                                                |            |                                                                                                                                                                                                                                                                                                                                                                                                                                                                                                                      |                                                                                                                           |                                                                                                                                                              |                                                                                                                                                                                                                                                                                                                                                                     |
| Farragher & Yanosy (2005)<br><br>(58) | A quality improvement project | Population: N/A<br><br>Residential programme : n=73 | Not stated  | Not stated | Service users:<br>Exposure to any trauma: 60-70%<br><br>Staff: | Not stated | Some staff were resistant to creating openness around confrontation styles, as some felt criticised for their previous ways of working.                                                                                                                                                                                                                                                                                                                                                                              | The Core Team developed a shared language which improved communication between service users and staff and helped them to | A multidisciplinary team (The Core Team) met regularly, enabling each department to evaluate their strengths, weaknesses, interaction styles and assumptions | None measured                                                                                                                                                                                                                                                                                                                                                       |

|                                         |                              |                                                                                       |                                                                                                                                                                                                                                                                                   |            |                             |                                                                                                                                                                                                                                                                                                                             |                                                                                                                                                                                                                                                                                                                                                                                                                                                                                                                                                                                                                                                                                                                                                                                                                                                       |                                                                                                                                                                     |                                                                                                                                                                                                                                                                                                                                                                                                                                                                                                                                                                                                                                                                                                                                                                            |               |
|-----------------------------------------|------------------------------|---------------------------------------------------------------------------------------|-----------------------------------------------------------------------------------------------------------------------------------------------------------------------------------------------------------------------------------------------------------------------------------|------------|-----------------------------|-----------------------------------------------------------------------------------------------------------------------------------------------------------------------------------------------------------------------------------------------------------------------------------------------------------------------------|-------------------------------------------------------------------------------------------------------------------------------------------------------------------------------------------------------------------------------------------------------------------------------------------------------------------------------------------------------------------------------------------------------------------------------------------------------------------------------------------------------------------------------------------------------------------------------------------------------------------------------------------------------------------------------------------------------------------------------------------------------------------------------------------------------------------------------------------------------|---------------------------------------------------------------------------------------------------------------------------------------------------------------------|----------------------------------------------------------------------------------------------------------------------------------------------------------------------------------------------------------------------------------------------------------------------------------------------------------------------------------------------------------------------------------------------------------------------------------------------------------------------------------------------------------------------------------------------------------------------------------------------------------------------------------------------------------------------------------------------------------------------------------------------------------------------------|---------------|
|                                         |                              | Day treatment programme : N=80                                                        |                                                                                                                                                                                                                                                                                   |            | Exposure to any trauma: 75% |                                                                                                                                                                                                                                                                                                                             |                                                                                                                                                                                                                                                                                                                                                                                                                                                                                                                                                                                                                                                                                                                                                                                                                                                       | work through problems and reach solutions.<br><br>Staff felt increasing responsibility and began to intervene when they observed a colleague escalating a conflict. | driving their behaviors and functioning.<br><br>Assessment processes were revised to better understand service user needs on arrival. Collaborative safety planning and including the service user in the process, was prioritised.                                                                                                                                                                                                                                                                                                                                                                                                                                                                                                                                        |               |
| Korchmaros, Greene & Murphy (2021) (67) | Retrospective pre/post study | Population: Staff<br><br>Sample size: Staff:<br>T1 - n= 25<br>T2 - n= 31<br>T3 - n=23 | Race:<br>T1<br>White 90%<br>Black 7%<br>Multiracial 3%<br>T2<br>White 91%<br>Black 6%<br>Multiracial 3%<br>T3<br>White 92%<br>Black 4%<br>Multiracial 4%<br><br>Hispanic ethnicity:<br>T1 – 37%<br>T2 – 34%<br>T3 – 36%<br><br>Sex<br>Female:<br>T1 – 70%<br>T2 – 63%<br>T3 – 60% | Not stated | Not stated                  | Staff roles: program directors, regional directors, school principal, clinical supervisors , case managers, therapists, unit coordinators, nurse, overnight staff, and behavioral health associates.<br><br>Length of employment:<br>T2 Employed for at least the past 13 months (therefore including T1) – 61.3%<br><br>T3 | Readiness:<br>Staff had more negative perceptions of their own implementation readiness (M=2.60) than agency leaders' readiness (M =3.10) and the agency's implementation readiness (M = 2.98).<br><br>Staff perceptions around agency and agency leader implementation readiness reduced between T1 (M=3.21 and 3.37) and T2 (M=2.98 and 3.02) and remained stable to T3 (M=2.76 and 2.92).<br><br>Staff perceptions of their own implementation readiness did not change across time points.<br><br>Staff satisfaction:<br>After 2.25 years post TIC implementation (T3), staff were satisfied with Seeking Safety (M=1.57, t(df) 2.73 (22), p<.01) but not The Sanctuary Model (M =1.26), not significant).<br><br>Acceptability:<br>At 2.25 years (T3) post TIC implementation, staff were generally accepting of The Sanctuary Model and Seeking | None measured                                                                                                                                                       | Program fidelity:<br>At T3, The Sanctuary Model and Seeking Safety were being used correctly and the implementation of The Sanctuary Model (M 2.57 t(df) 3.21 (22), p <.01) and Seeking Safety (M 2.83 t(df) 5.10 (22), p<0.01) was of good quality.<br><br>Feasibility:<br>4 months (T1) post TIC implementation, staff perceptions of the feasibility of the implementation of the TI-RSTs were positive.<br><br>On average, staff thought that the treatment agency was capable of trauma informed change (M 3.24 t(df) 8.57(24) p<0.01) and sustaining change (M 2.72 t(df) 4.88 (24) p<0.01). Over the next 2 years, these perceptions were stable.<br><br>Staff training:<br>At 1.25 (T2) and 2.25 (T3) years post TIC implementation, most staff reported receiving | None measured |

|                    |                     |                                                                                                                                   |            |            |            |                                                                                                                                                                                                                                        |                                                                                                                                                                                                                                                                                                                                                                                                                                                                                                                                                                                                                                                                                                                                                        |                                                                                                                                                                                                                                                                                                                                                                                                                                                                                                                                 |                                                                                                                                                                                                                                                                                                                                                                                                                                                                                                                                                                          |               |
|--------------------|---------------------|-----------------------------------------------------------------------------------------------------------------------------------|------------|------------|------------|----------------------------------------------------------------------------------------------------------------------------------------------------------------------------------------------------------------------------------------|--------------------------------------------------------------------------------------------------------------------------------------------------------------------------------------------------------------------------------------------------------------------------------------------------------------------------------------------------------------------------------------------------------------------------------------------------------------------------------------------------------------------------------------------------------------------------------------------------------------------------------------------------------------------------------------------------------------------------------------------------------|---------------------------------------------------------------------------------------------------------------------------------------------------------------------------------------------------------------------------------------------------------------------------------------------------------------------------------------------------------------------------------------------------------------------------------------------------------------------------------------------------------------------------------|--------------------------------------------------------------------------------------------------------------------------------------------------------------------------------------------------------------------------------------------------------------------------------------------------------------------------------------------------------------------------------------------------------------------------------------------------------------------------------------------------------------------------------------------------------------------------|---------------|
|                    |                     |                                                                                                                                   |            |            |            | Employed for more than 2 years (therefore including T1) – 52.2%                                                                                                                                                                        | <p>Safety and thought that they improved client outcomes.</p> <p>Staff were likely to adopt intuitive evidence-based TIC practices, were likely to adopt required evidence-based practices, were open to new evidence-based practices, and believed that evidence-based practices were important and useful. This positivity did not change over time.</p>                                                                                                                                                                                                                                                                                                                                                                                             |                                                                                                                                                                                                                                                                                                                                                                                                                                                                                                                                 | <p>The Sanctuary Model and Seeking Safety training. At T2 years post TIC implementation, 90% of staff reported receiving any The Sanctuary Model training. At T3 years post TIC implementation, 96% of staff reported receiving Sanctuary Model training.</p> <p>At T2 years post TIC implementation, 70% of staff reported receiving Seeking Safety training. At T3 years into TIC implementation, 74% of staff reported receiving Seeking Safety training.</p>                                                                                                         |               |
| Kramer (2016) (68) | Service description | <p>Population: Service users and staff</p> <p>Staff: Focus groups n=10 Interviews n= 3</p> <p>Service user: Focus groups n=13</p> | Not stated | Not stated | Not stated | <p>One focus group consisted of youth care workers with a representation of new hires (experience of one year or less) and experienced workers (between 3 and 5 years' experience) . The second group consisted of clinical staff.</p> | <p>Staff and service users reported an ability to perceive linkages between rights and responsibilities, an increased ability to identify and confront re-enactment situations.</p> <p>Staff and service users reported an increased ability to articulate realistic goals for themselves while creating strategies for change. They also reported increased hope for the future.</p> <p>Service users reported that keeping their feelings “in check” is important to reduce the impact on themselves and others.</p> <p>Service users become active participants in their recovery and contribute to a safety plan and engage with conflict resolution.</p> <p>There were narrative descriptions of reductions in absconsion, restraint, removal</p> | <p>Service users have found that there is less victim-blaming, punitive, and judgmental responses post TIC. They experienced clearer and consistent interpersonal boundaries, and expected more from their interactions. Service users reflected on the importance of positive staff support (both formal and informal) in their therapeutic relationships.</p> <p>Open communication was key, but was still a work in progress as some staff members were not employing communication skills effectively or appropriately.</p> | <p>Service users experienced the setting as a safety net, where there was a sense of community. Service users made use of the community, including by participating in group meetings.</p> <p>Service users wanted more democratic processes, and staff spoke of developing a service user ‘government’ to facilitate voicing their opinions and concerns.</p> <p>Sanctuary culture is creating a safe, therapeutic community. The Sanctuary safety planning, psychoeducation, community meeting strategies make the community operate as a therapeutic environment.</p> | None measured |

|                       |                    |                             |                                                                                                                                                                                                                                                                                                                                                            |                                                                                                                                      |                                                                                                                                                                                              |                                                                              |                                                                                                                                                                                                                                                                                                                                                                                                                                                                                                                                                                                                                                                                                                                                                                                                                                                                                                                                                                                                                                                                        |                                                                                                                                                                                                                                                                                                                                                                                                                                                                                                                                                                                                                                                                                                                                       |                                                                                                                                                                                                                                                                                                                                                                                           |                                                                                                                                                                                                                                                                                                                                                                                                                                |
|-----------------------|--------------------|-----------------------------|------------------------------------------------------------------------------------------------------------------------------------------------------------------------------------------------------------------------------------------------------------------------------------------------------------------------------------------------------------|--------------------------------------------------------------------------------------------------------------------------------------|----------------------------------------------------------------------------------------------------------------------------------------------------------------------------------------------|------------------------------------------------------------------------------|------------------------------------------------------------------------------------------------------------------------------------------------------------------------------------------------------------------------------------------------------------------------------------------------------------------------------------------------------------------------------------------------------------------------------------------------------------------------------------------------------------------------------------------------------------------------------------------------------------------------------------------------------------------------------------------------------------------------------------------------------------------------------------------------------------------------------------------------------------------------------------------------------------------------------------------------------------------------------------------------------------------------------------------------------------------------|---------------------------------------------------------------------------------------------------------------------------------------------------------------------------------------------------------------------------------------------------------------------------------------------------------------------------------------------------------------------------------------------------------------------------------------------------------------------------------------------------------------------------------------------------------------------------------------------------------------------------------------------------------------------------------------------------------------------------------------|-------------------------------------------------------------------------------------------------------------------------------------------------------------------------------------------------------------------------------------------------------------------------------------------------------------------------------------------------------------------------------------------|--------------------------------------------------------------------------------------------------------------------------------------------------------------------------------------------------------------------------------------------------------------------------------------------------------------------------------------------------------------------------------------------------------------------------------|
|                       |                    |                             |                                                                                                                                                                                                                                                                                                                                                            |                                                                                                                                      |                                                                                                                                                                                              |                                                                              | from the programme.<br><br>The residents felt empowered and able to trust in others enough to narrate their stories in individual, family, and group therapies and within the Sanctuary milieu.                                                                                                                                                                                                                                                                                                                                                                                                                                                                                                                                                                                                                                                                                                                                                                                                                                                                        |                                                                                                                                                                                                                                                                                                                                                                                                                                                                                                                                                                                                                                                                                                                                       | Staff who do not buy-in to Sanctuary may be less committed to delivering the programme and to comply with its strategies and may believe that confounding variables explain the changes observed.                                                                                                                                                                                         |                                                                                                                                                                                                                                                                                                                                                                                                                                |
| Prchal (2005)<br>(70) | Service evaluation | Population: Staff<br>N = 67 | Demographic data was not collected from the study participants.<br><br>However, demographic data was available for the service user population.<br><br>Age:<br>Range: 12-20 years<br>Mean=15 years<br><br>Race:<br>Hispanic 34%<br>Black non-Hispanic 51%<br>White 11%,<br>Asian, Pacific Islander, or biracial 4%<br><br>Sex:<br>Male: 73%<br>Female: 27% | Not stated, but service was designed for children and young people with 'conduct disorders and other serious emotional disturbances' | Service users:<br><br>Experienced at least one physical abuse incident: 34%<br><br>Experienced at least one sexual abuse incident: 12%<br><br>Experienced at least one neglect incident: 45% | Milieu staff members, clinicians (Master's level therapists), administrators | Staff experiences, attitudes and beliefs:<br>Clinical staff mostly perceived the Sanctuary Model as positive, though some felt it was too abstract. The information given to staff on trauma supported them to be more psychologically informed and to understand service user behaviours with more compassion. This led to less verbal abuse used by the milieu staff, who are subjected to the service users' aggression most often. Staff overall felt they made and better clinical decisions. Clinical staff reported that the trauma informed nature of the Sanctuary Model was an improvement over previous approaches used in the unit.<br><br>The most beneficial components of the Sanctuary Model for staff were the principles that improved safety on the units, encouraged respect and communication among staff and between staff and youth, and encouraged staff to think about and frame negative service user behaviour within a trauma informed framework.<br><br>Service user outcomes:<br>They worked effectively in groups, and leaders emerged. | Staff now take the time to explain decisions that directly affect service users, which previously were handed down without explanation, sometimes leading to conflict.<br><br>Staff encourage service users to be actively involved in their communities.<br><br>Staff communicate more effectively, and more often, with each other. However, a barrier to implementation was the communication between staff in different roles (psychiatrists, therapists and milieu staff), where staff reported feeling dismissed and undervalued.<br><br>Staff are now models for respectful behaviour between each other and towards the service users.<br><br>Sanctuary language was incorporated into daily communications between staff and | Clinicians increased the time they spent onsite supporting milieu staff.<br><br>Service users are given opportunities to develop their own community rules, and to call on their community when an issue is identified.<br><br>Service users were also given a key role in developing their personal safety plans. All staff were invited to contribute to each service user's treatment. | The unit did not create many opportunities or incentives for senior staff to flatten the hierarchy experienced by staff in various roles on the unit.<br><br>Implementing the Sanctuary model was resource intensive, and required an entire philosophical change, as well as increased staff training and technical assistance. High staff turnover, and limited administration support, were key barriers to implementation. |

|                                                                           |                                                     |                                                                                                                                                                                    |            |            |            |                                                            |                                                                                                                                                                                          |                                                                                                                                                                                                                                                                                                                                                                                                                                                                                                                                                                                                                                                                                                                                                                                                                                                           |                                                                                                                                                                                                                                                                                                                                                                                                                                                                                                                                                                                                                                                                                                                                                                                                                                                                                                                                                                                                                                      |               |
|---------------------------------------------------------------------------|-----------------------------------------------------|------------------------------------------------------------------------------------------------------------------------------------------------------------------------------------|------------|------------|------------|------------------------------------------------------------|------------------------------------------------------------------------------------------------------------------------------------------------------------------------------------------|-----------------------------------------------------------------------------------------------------------------------------------------------------------------------------------------------------------------------------------------------------------------------------------------------------------------------------------------------------------------------------------------------------------------------------------------------------------------------------------------------------------------------------------------------------------------------------------------------------------------------------------------------------------------------------------------------------------------------------------------------------------------------------------------------------------------------------------------------------------|--------------------------------------------------------------------------------------------------------------------------------------------------------------------------------------------------------------------------------------------------------------------------------------------------------------------------------------------------------------------------------------------------------------------------------------------------------------------------------------------------------------------------------------------------------------------------------------------------------------------------------------------------------------------------------------------------------------------------------------------------------------------------------------------------------------------------------------------------------------------------------------------------------------------------------------------------------------------------------------------------------------------------------------|---------------|
|                                                                           |                                                     |                                                                                                                                                                                    |            |            |            |                                                            | The service users also began to express distress in a less destructive way.                                                                                                              | youth, creating a shared understanding.                                                                                                                                                                                                                                                                                                                                                                                                                                                                                                                                                                                                                                                                                                                                                                                                                   |                                                                                                                                                                                                                                                                                                                                                                                                                                                                                                                                                                                                                                                                                                                                                                                                                                                                                                                                                                                                                                      |               |
| Rivard, McCorkle, Duncan, Pasquale, Bloom & Abramovitz (2004)<br><br>(71) | Pre/post implementation of intervention pilot study | Population: Staff<br><br>Ten focus groups; 3 involved clinicians and administrators (n=7–12 in each group), and 7 focus groups involved milieu counsellors (n=3–10 in each group). | Not stated | Not stated | Not stated | Clinicians, administrators/supervisors, milieu counsellors | Staff shifted from thinking that they were responding to bad behaviours from service users, but instead thinking that these were opportunities to teach more adaptive coping mechanisms. | Safety plans encouraged service users to be responsible for their treatment, and rather than depending on program rules, staff supported service users to process their feelings, make decisions with the service users, and to discuss alternatives.<br><br>When working with families where there is a trauma history, it is difficult to acknowledge the issues at hand without the families feeling blamed and increasing their guilt and remorse.<br><br>Staff are aware that their communication skills are related to safety. The more they communicate, the physically safer the environment is for everyone. Communication helps to build trust and a feeling of closeness. When the environment is more psychologically and socially secure, staff are able to share their ideas, opinions, frustrations, and mistakes more openly with others. | Consistency was promoted by staff training, community meetings, structure time for team building, making the use of the psychoeducation tools a procedure, staff openness, service users listening, maintaining satisfaction and motivation, enthusiasm and constant reinforcement, supporting service users to gain a broader understanding of what it means to recover from trauma, cohesion among staff and service users, providing incentives for positive behaviours in the community, strong program leadership, the presence of staff on the units, and clarity over staff authority figures. Staff felt that TIC helped to make change happen faster.<br><br>Barriers to implementation included insufficient time to communicate and do the required team building. There were different ways of managing crises across the units, leading to inconsistency. Not all staff had received the formal TIC training. There was a perceived lack of, or shifting, administrative support and resource allocation, affecting TIC | None measured |

|                                                         |                    |                                                                                  |                                                                                                                                                                                                                                           |                                                                               |                                                                                                                                                                                                                                                                                              |            |                                                                                                                                                                                                                                                                                                                                                                                                                                                                                                                                                                                                                                                                                                                                                                                        |                                                                                                                                                                                                                                                                                                                      |                                                                                                                                                                                                                                                                                                                                                                                                                                                                                    |                                                                                                                                                                                                                                                                                                                                                                                                                                                                                                                                                               |
|---------------------------------------------------------|--------------------|----------------------------------------------------------------------------------|-------------------------------------------------------------------------------------------------------------------------------------------------------------------------------------------------------------------------------------------|-------------------------------------------------------------------------------|----------------------------------------------------------------------------------------------------------------------------------------------------------------------------------------------------------------------------------------------------------------------------------------------|------------|----------------------------------------------------------------------------------------------------------------------------------------------------------------------------------------------------------------------------------------------------------------------------------------------------------------------------------------------------------------------------------------------------------------------------------------------------------------------------------------------------------------------------------------------------------------------------------------------------------------------------------------------------------------------------------------------------------------------------------------------------------------------------------------|----------------------------------------------------------------------------------------------------------------------------------------------------------------------------------------------------------------------------------------------------------------------------------------------------------------------|------------------------------------------------------------------------------------------------------------------------------------------------------------------------------------------------------------------------------------------------------------------------------------------------------------------------------------------------------------------------------------------------------------------------------------------------------------------------------------|---------------------------------------------------------------------------------------------------------------------------------------------------------------------------------------------------------------------------------------------------------------------------------------------------------------------------------------------------------------------------------------------------------------------------------------------------------------------------------------------------------------------------------------------------------------|
|                                                         |                    |                                                                                  |                                                                                                                                                                                                                                           |                                                                               |                                                                                                                                                                                                                                                                                              |            |                                                                                                                                                                                                                                                                                                                                                                                                                                                                                                                                                                                                                                                                                                                                                                                        |                                                                                                                                                                                                                                                                                                                      | implementation. There were also constraints as a result of the research design which limited the implementation of TIC. Staff reported the need for additional training with more experiential content.                                                                                                                                                                                                                                                                            |                                                                                                                                                                                                                                                                                                                                                                                                                                                                                                                                                               |
| Rivard, Bloom, McCorkle, Abramovitz, (2005)<br><br>(72) | Service evaluation | Population: Service users and staff<br><br>Youth: N=158<br><br>Staff: not stated | Service users:<br><br>Age: Range: 12-20 years<br>Mean: 15 years<br><br>Ethnicity: Hispanic = 33%<br>Black = 47%<br>White = 13%<br>Asian, Oriental, or Pacific Islander = 1%<br>Bi-racial or other = 6%<br><br>Sex: Men: 63%<br>Women: 37% | Service users averaged 6 prior placements, and 3 psychiatric hospitalisations | Service users: At least one incident of physical abuse: 33%<br>At least one incident of sexual abuse: 14%<br>At least one incident of neglect (48%)<br>Seen someone else attacked with a weapon: 42%<br>Been attacked with a weapon: 23%<br>Seen someone else shot: 20%<br>Been shot at: 11% | Not stated | Between baseline and 6 months, the incendiary communication/ tension management scale of the Youth Coping Index scale measures, significantly decreased over time. Scores for the Standard Residential Services significantly increased ( $p < 0.05$ ).<br><br>Scores on the Nowicki-Strickland Locus of Control Scale decreased over time, and they became more internalising, indicating an increased sense of control over their lives. Scores of service users in the Standard Residential Services remained constant ( $p=0.15$ ).<br><br>On the verbal aggression scale of the Social Problem-Solving Questionnaire, scores of service users in the Sanctuary Model decreased slightly, whereas service user scores in the Standard Residential Services increased ( $p=0.15$ ). | Staff stated that trauma theories were helpful in emphasising the way that issues and behaviours of service users are linked to their experiences and helped them to redirect towards recovery.<br><br>Counsellors learned new ways to problem-solve with staff and service users, and these were important to them. | Therapeutic community outcomes were measured by COPES. No significant differences were found across the conditions at baseline and over the following 2 two phases of measurement. By the final measurement phase, there were significant group differences on the following constructs of the COPES: support ( $p<0.05$ ), spontaneity ( $p<0.01$ ), autonomy ( $p<0.05$ ), personal problem orientation ( $p<0.05$ ), safety ( $p<0.05$ ), and in the total score ( $p=0.001$ ). | Across the units that implemented the model, scores on the Sanctuary Project Implementation Milestones criteria ranged from 66% to 92% (mean=78%).<br><br>The most challenging component to implement was the weekly psychoeducation group. Improved implementation was observed in units that had been exposed longer to TIC, and where the leadership demonstrated enthusiasm and commitment to TIC.<br><br>Important principles and concepts that staff identified included the central focus on safety and the feeling of community and greater teamwork. |
| Comprehensive tailored trauma-informed model            |                    |                                                                                  |                                                                                                                                                                                                                                           |                                                                               |                                                                                                                                                                                                                                                                                              |            |                                                                                                                                                                                                                                                                                                                                                                                                                                                                                                                                                                                                                                                                                                                                                                                        |                                                                                                                                                                                                                                                                                                                      |                                                                                                                                                                                                                                                                                                                                                                                                                                                                                    |                                                                                                                                                                                                                                                                                                                                                                                                                                                                                                                                                               |

|                                                                |                           |                                                                                                                                                                                                                                                                                                                |                                                                                                                                                                                                                                                                 |                                            |                                                                                                                                                                                                                                                                                                                                                                                      |                   |                                                                                                                                                                                                                                                                                                                                                                                                                                                                                                                                                                                                                                                                                                                                                                                                                                                                                                                                                                                                           |                      |                                                                                                                                                                                                                                                                                                                                                                                                                                                                                                                                                                                                                                                                                                                                                         |                      |
|----------------------------------------------------------------|---------------------------|----------------------------------------------------------------------------------------------------------------------------------------------------------------------------------------------------------------------------------------------------------------------------------------------------------------|-----------------------------------------------------------------------------------------------------------------------------------------------------------------------------------------------------------------------------------------------------------------|--------------------------------------------|--------------------------------------------------------------------------------------------------------------------------------------------------------------------------------------------------------------------------------------------------------------------------------------------------------------------------------------------------------------------------------------|-------------------|-----------------------------------------------------------------------------------------------------------------------------------------------------------------------------------------------------------------------------------------------------------------------------------------------------------------------------------------------------------------------------------------------------------------------------------------------------------------------------------------------------------------------------------------------------------------------------------------------------------------------------------------------------------------------------------------------------------------------------------------------------------------------------------------------------------------------------------------------------------------------------------------------------------------------------------------------------------------------------------------------------------|----------------------|---------------------------------------------------------------------------------------------------------------------------------------------------------------------------------------------------------------------------------------------------------------------------------------------------------------------------------------------------------------------------------------------------------------------------------------------------------------------------------------------------------------------------------------------------------------------------------------------------------------------------------------------------------------------------------------------------------------------------------------------------------|----------------------|
| <p>Boel-Studdt &amp; Shamra Marie (2017)</p> <p>(51)</p>       | <p>Service evaluation</p> | <p>Population: Service user</p> <p>Sample Size: Total: n=205 Children and adolescents who received traditional Psychiatric Residential Treatment (PRT; n = 100) Children and adolescents who received Trauma Informed-Psychiatric Residential Treatment (TI-PRT; n = 105, with complete treatment records)</p> | <p>Service user:</p> <p>Age: Range: 5-17 years (M=10.53, SD= 2.68).</p> <p>Race: White (69.3%) Multiracial (13.7%) Black (11.2%)</p> <p>Sex: Male: 58% Female: 42%</p> <p>TI-PRT group (n=105) female n=45, 42.9%</p> <p>PRT group (n=100) female n=41, 41%</p> | <p>Minimum length of stay was 5 weeks.</p> | <p>TI-PRT group (n=105)</p> <p>Emotional abuse n=60, 57.1%</p> <p>Neglect n=55, 52.4%</p> <p>Physical abuse n=52, 49.5%</p> <p>Sexual abuse n=39, 37.5%</p> <p>Domestic violence n=31, 29.5%</p> <p>PRT group (n=100)</p> <p>Emotional abuse n=53, 53%</p> <p>Neglect n=45, 45%</p> <p>Physical abuse n=49, 49%</p> <p>Sexual abuse n=30, 30%</p> <p>Domestic violence n=23, 23%</p> | <p>N/A</p>        | <p>As Child and Adolescent Functional Assessment Scale (CAFAS) scores increased, the odds of experiencing no restraints decreased (odds ratio=0.98, p=0.007)</p> <p>Service users receiving TI-PRT spent fewer months in treatment on average (M=6.45, SD=3.07) compared to those in the traditional PRT (M=10.78, SD=4.71).</p> <p>After controlling for age, sex, race, and CAFAS scores at intake, there was a significant association between treatment condition and length of stay (F(5, 204)=13.07, p=0.000, R<sup>2</sup> =0.247).</p> <p>Receiving TI-PRT accounted for a quarter of the variance in length of stay between groups.</p> <p>Approximately 93% of service users in TI-PRT were discharged to community-based placements compared with 82% in the PRT group, but this was not statistically significant.</p> <p>CAFAS scores at discharge indicated that service users in both groups improved over the course of treatment. The TI-PRT group experienced greater improvements.</p> | <p>None measured</p> | <p>The number of physical restraints for the sample ranged from 0 to 130. About 37.1% of youth experienced no restraints; Seclusion incidents ranged from 0 to 128 with 64.9% of the sample having experienced no incidents; The average number of restraints in TI-PRT facilities (M = 9.13, SD= 17.38; Median = 3) was higher compared with traditional PRT (M = 6.13, SD = 6.13; Median = 1); Conversely, the average number of seclusion room placements in traditional PRT (M = 10.90, SD = 25.96; Median = 0) was higher than TIPRT (M = 4.19, SD = 9.82, Median = 0) ; The expected number of seclusion room incidents for youth in the TI-PRT condition was less compared with youth in the traditional PRT condition (OR = .41, p = .000);</p> | <p>None measured</p> |
| <p>Brown, McCauley, Navalta, &amp; Saxe (2013)</p> <p>(53)</p> | <p>Service evaluation</p> | <p>Population: Service users</p> <p>Boston IRTP: Sample size not stated</p>                                                                                                                                                                                                                                    | <p>Age: All three programs were aimed at children.</p>                                                                                                                                                                                                          | <p>Not stated</p>                          | <p>BOSTON IRTP: Not stated</p> <p>KVC Health Systems: Service users were exposed</p>                                                                                                                                                                                                                                                                                                 | <p>Not stated</p> | <p>BOSTON IRTP: There was a dramatic and sustained decrease in physical restraints following TIC implementation. There was no increase in staff or child assaults.</p> <p>KVC Health Systems: There was a</p>                                                                                                                                                                                                                                                                                                                                                                                                                                                                                                                                                                                                                                                                                                                                                                                             | <p>None measured</p> | <p>None measured</p>                                                                                                                                                                                                                                                                                                                                                                                                                                                                                                                                                                                                                                                                                                                                    | <p>None measured</p> |

|                                 |                |                                                                           |                                                                                                                                                                                    |                                                                                                                                  |                                                                                                                                                          |            |                                                                                                                                                                                                                                                                                                                                                                                                                                                                                                                                                                                                                                                                                                                                               |                                                                                                                                                                                                                                                                                                                                        |              |                                                                                                                                                                                                                                                                                                                                                                                          |
|---------------------------------|----------------|---------------------------------------------------------------------------|------------------------------------------------------------------------------------------------------------------------------------------------------------------------------------|----------------------------------------------------------------------------------------------------------------------------------|----------------------------------------------------------------------------------------------------------------------------------------------------------|------------|-----------------------------------------------------------------------------------------------------------------------------------------------------------------------------------------------------------------------------------------------------------------------------------------------------------------------------------------------------------------------------------------------------------------------------------------------------------------------------------------------------------------------------------------------------------------------------------------------------------------------------------------------------------------------------------------------------------------------------------------------|----------------------------------------------------------------------------------------------------------------------------------------------------------------------------------------------------------------------------------------------------------------------------------------------------------------------------------------|--------------|------------------------------------------------------------------------------------------------------------------------------------------------------------------------------------------------------------------------------------------------------------------------------------------------------------------------------------------------------------------------------------------|
|                                 |                | KVC Health Systems:<br>n=70                                               |                                                                                                                                                                                    |                                                                                                                                  | to an average of four traumas — the most common being physical abuse, domestic violence, sexual abuse, and exposure to community violence.               |            | decrease in CAFAS measured functional impairment in all domains, with an average exit score of 56 one year after TIC, compared to an average exit score of 120 for the pre-TIC 2008 comparison group.<br><br>For service users discharged, placement stability was 89% to a foster home or kinship placement, compared to placement stability of only 48% for the pre-TIC 2008 comparison group.<br><br>Per service user, there was an average of 1.4 placement moves, compared to 3.4 placement moves for a pre-TIC 2008 comparison group.<br><br>There was a decrease in the use of both seclusions and restraints in the service. There was a “safety hold” rate of 7.59 per 1000 patient days in May 2010 compared to 37.55 in July 2009. |                                                                                                                                                                                                                                                                                                                                        |              |                                                                                                                                                                                                                                                                                                                                                                                          |
| Cadiz et al. (2005)<br><br>(54) | Pre-post study | Population: Service user<br><br>Sample size: Not stated, 417 bed facility | Average age: 34<br><br>Race/ Ethnicity: 62% African American<br>8% White,<br>29.4% Other<br>41% Hispanic,<br>24.6% Puerto Rican<br><br>Sex: 100% female<br><br>Number of children: | 27% attempted suicide<br><br>85% reported mental health difficulties.<br><br>100% addiction history<br>65% were daily drug users | Service users<br><br>73% had a trauma history<br><br>30% reported childhood sexual or physical abuse<br><br>25% reported domestic violence victimisation | Not stated | Service user experiences of TIC: By engaging women in a familiar, safe environment, they were more receptive to the services and the staff.<br><br>Group members appreciated the self-determination, in making their own rules, starting the check-in at the start of every group, and validating their experiences.                                                                                                                                                                                                                                                                                                                                                                                                                          | Cultural considerations: Staff considered the cultural importance of food, and mealtimes, which enhanced the quality of the care, made inter-cultural communication more effective, and assisted the engagement process.<br><br>Service user experiences: Through the introduction of TIC, the women built trust with other members of | Not measured | Women’s Treatment Specialist co-led group interventions with mental health staff at the intervention site, which taught existing staff about TIC so that they could take over group leadership, enabled more flexible leadership, and gave service users more options for staff support.<br><br>Confidentiality was an issue, which led to some service users opting not to participate. |



|                                                                                  |                |                                                          |                                                                                                                                                                                                                                                                                                                                            |                                                                                                                                                                                                       |     |     |                                                                                                                                                                                                                                                                                                                                                                                                                                                                                                                                                                                  |                                            |  |               |
|----------------------------------------------------------------------------------|----------------|----------------------------------------------------------|--------------------------------------------------------------------------------------------------------------------------------------------------------------------------------------------------------------------------------------------------------------------------------------------------------------------------------------------|-------------------------------------------------------------------------------------------------------------------------------------------------------------------------------------------------------|-----|-----|----------------------------------------------------------------------------------------------------------------------------------------------------------------------------------------------------------------------------------------------------------------------------------------------------------------------------------------------------------------------------------------------------------------------------------------------------------------------------------------------------------------------------------------------------------------------------------|--------------------------------------------|--|---------------|
|                                                                                  |                |                                                          | <p>85% &lt; 1 child<br/>Average of 3 children</p> <p>Child welfare involvement:<br/>36% of children prior to treatment entry<br/>64.2% of children were staying with family/ others.</p> <p>Housing:<br/>22% homeless/<br/>living in shelters</p> <p>Incarceration history:<br/>60% history of incarceration and mandated to treatment</p> |                                                                                                                                                                                                       |     |     |                                                                                                                                                                                                                                                                                                                                                                                                                                                                                                                                                                                  | staff and felt able to seek their support. |  |               |
| Forrest, Gervais, Lord, Sposato, Martin, Beserra & Spinazzola (2018)<br><br>(59) | Pre-post study | <p>Population: Service users</p> <p>Sample size: N/A</p> | <p>Service users:</p> <p>Age:<br/>Range: 12-22 years</p>                                                                                                                                                                                                                                                                                   | <p>Program 1: Service users experiencing mood, anxiety, or trauma-related Symptomatology</p> <p>Program 2: Service users experiencing mild-moderate cognitive impairment or developmental delays,</p> | N/A | N/A | <p>Length of stay:</p> <p>Programme 1:<br/>2012 (M=19.94 months)<br/>2013 (M=12.15) prior to TIC implementation.<br/>From 2013 to 2017 (M=12.85) length of stay remained stable but was decreasing overall.</p> <p>Program 2:<br/>Length of stay fluctuated in the 4 years before TIC implementation. Length of stay decreased from 2015-2016 (M=24.84 months), then increased in 2017 (M=28.80 months).</p> <p>Restraint use:<br/>Program 1:<br/>Staff utilized an average of 112.63 restraints per quarter pre-TIC implementation. Restraint use fluctuated throughout the</p> | None measured                              |  | None measured |

|                                            |                                                                        |                                                             |            |                                                      |     |                                                                                                                                                                                                 |                                                                                                                                                                                                                                                                                                                                                                                                                                                                                                                                                                                                                                                                                                                                                                                                                                        |               |               |               |
|--------------------------------------------|------------------------------------------------------------------------|-------------------------------------------------------------|------------|------------------------------------------------------|-----|-------------------------------------------------------------------------------------------------------------------------------------------------------------------------------------------------|----------------------------------------------------------------------------------------------------------------------------------------------------------------------------------------------------------------------------------------------------------------------------------------------------------------------------------------------------------------------------------------------------------------------------------------------------------------------------------------------------------------------------------------------------------------------------------------------------------------------------------------------------------------------------------------------------------------------------------------------------------------------------------------------------------------------------------------|---------------|---------------|---------------|
|                                            |                                                                        |                                                             |            | and concurrent behavioural or mental health problems |     |                                                                                                                                                                                                 | study period. Post-BCC implementation an average of 68.80 restraints was utilized per quarter.<br>Program 2:<br>At the onset of TIC implementation, there was variable use of restraints. Staff used on average 62.47 restraints per quarter. Restraints were high prior to TIC implementation (n=117) but this reduced post-implementation (n=18). Overall, there was a small reduction in the use of restraints post TIC implementation.                                                                                                                                                                                                                                                                                                                                                                                             |               |               |               |
| Goetz & Taylor-Trujillo (2012)<br><br>(60) | Description of service implementation, and pre/post intervention study | Population: Staff and service users<br><br>Sample size: N/A | Not stated | N/A                                                  | N/A | The team that planned and introduced the TIC model included of the director of clinical services, the director of risk management, the employee health nurse, and the clinical program manager. | Prior to TIC implementation, staff injuries in 2006: n=103<br>During year 1 of TIC intervention, injuries were reduced by 48%.<br>In 2006, the hospital census increased with a large number of new employees in the organization with limited relevant experience. This was thought to contribute to the level of injury. Staff were also adjusting to the introduction of the PFI model.<br><br>Seclusion and restraint rates were reduced by at least 50%. The duration of seclusions and restraints reduced by 75% over the first 2 years after TIC implementation.<br><br>Patient satisfaction scores and staff safety survey data reflected a culture change and a change in treatment of patients occurred in all areas of the facility.<br><br>In 2008, 1 year after the implementation of TIC, the staff safety survey showed | None measured | None measured | None measured |

|                               |                          |                           |                                                                                                                                                        |     |                                                                                                                                                                                                                          |                                                                                                                                                                                                                                                                                                |                                                                                                                                                                                                                                                                                                                                                                                                                                                                                                                                                                                                                                                                                                                                                                                                                                                                                                                                                                                                                                            |                                                                                                                                                                                                                                                                                                                                                                                                                                                                                                                                                                                                                                                                                                                               |                                                                                                                                                                                                                                                                                                                 |                                                                                                                                                                                                                                                                                                                                                                                                                                                                                                                                                                                                                                                                                                                                                                                                                                                          |
|-------------------------------|--------------------------|---------------------------|--------------------------------------------------------------------------------------------------------------------------------------------------------|-----|--------------------------------------------------------------------------------------------------------------------------------------------------------------------------------------------------------------------------|------------------------------------------------------------------------------------------------------------------------------------------------------------------------------------------------------------------------------------------------------------------------------------------------|--------------------------------------------------------------------------------------------------------------------------------------------------------------------------------------------------------------------------------------------------------------------------------------------------------------------------------------------------------------------------------------------------------------------------------------------------------------------------------------------------------------------------------------------------------------------------------------------------------------------------------------------------------------------------------------------------------------------------------------------------------------------------------------------------------------------------------------------------------------------------------------------------------------------------------------------------------------------------------------------------------------------------------------------|-------------------------------------------------------------------------------------------------------------------------------------------------------------------------------------------------------------------------------------------------------------------------------------------------------------------------------------------------------------------------------------------------------------------------------------------------------------------------------------------------------------------------------------------------------------------------------------------------------------------------------------------------------------------------------------------------------------------------------|-----------------------------------------------------------------------------------------------------------------------------------------------------------------------------------------------------------------------------------------------------------------------------------------------------------------|----------------------------------------------------------------------------------------------------------------------------------------------------------------------------------------------------------------------------------------------------------------------------------------------------------------------------------------------------------------------------------------------------------------------------------------------------------------------------------------------------------------------------------------------------------------------------------------------------------------------------------------------------------------------------------------------------------------------------------------------------------------------------------------------------------------------------------------------------------|
|                               |                          |                           |                                                                                                                                                        |     |                                                                                                                                                                                                                          |                                                                                                                                                                                                                                                                                                | <p>improvements in 50% of the areas, including how staff perceived the effectiveness of the patient aggression management program.</p> <p>There was a decrease in the total number of patient events (Code Gray events), and in the number of mechanical restraints episodes since the introduction of TIC.</p>                                                                                                                                                                                                                                                                                                                                                                                                                                                                                                                                                                                                                                                                                                                            |                                                                                                                                                                                                                                                                                                                                                                                                                                                                                                                                                                                                                                                                                                                               |                                                                                                                                                                                                                                                                                                                 |                                                                                                                                                                                                                                                                                                                                                                                                                                                                                                                                                                                                                                                                                                                                                                                                                                                          |
| Stamatopoulou, (2019)<br>(73) | Mixed methods case study | Population: Staff<br>N=20 | <p>Age: Range: 24-62 years</p> <p>Ethnicity: White British n=18 (90%), Multiracial n=1 (5%) Asian British n=1 (5%)</p> <p>Sex: Female: n=20 (100%)</p> | N/A | <p>Service users: N=29/31 of the service users endorsed traumatic experiences on the HCR-20 V3 risk assessment.</p> <p>94% of service users from December 2017 reported experiencing one or more traumatic event(s).</p> | <p>A multi-disciplinary team which comprises nursing, psychiatry, psychology, occupational therapy, dietetics, speech and language therapy, social work and physiotherapy.</p> <p>Nursing background n=18 (90%)<br/>Psychotherapists n=2 (10%)</p> <p>Length of service: Range: 3-20 years</p> | <p>Staff engaged in a process of unlearning their personal attitudes towards service users and themselves as professionals after TIC implementation. Staff also reflected that these attitudes may have impacted way they viewed the transition to TIC and added to the fear and anxiety within the team.</p> <p>They reconnected with the job satisfaction which some had lost. Staff reported feeling valued and felt a sense of achievement having implemented TIC. The culture of working in a forensic unit may have resulted in internalised attitudes of thinking that you needed to remain stoic. There was an evolving appreciation and focus on staff welfare, which was supported by increasing awareness around people's boundaries and recognising their personal experiences of adversity and trauma, and of vicarious trauma.</p> <p>Staff were about what was expected from them when TIC was implemented, as it was a new way of working, potentially leading to low confidence and a need for reassurance. The shift</p> | <p>There was a connectedness between the staff, and between the staff and the service users. Staff talked about the increasing time and space shared with service users, and this led to a culture of shared learnings. This happened through group reflections and the introduction of recovery processes after incidents.</p> <p>Staff established openness through trust and experience/information sharing in the team. The transition to TIC introduced staff to a new paradigm of understanding distress which moves away from the medical model. By adopting a trauma focused lens, participants could learn about service users and make links between service users' backgrounds and their behaviour. Staff were</p> | <p>Within the third theme: "navigating new practices" Discovering new ways to manage risk has been one of the practices that participants seem to directly link to the reduction of incidents in the unit while there seems to be a deep appreciation for the introduction of structure in the working day.</p> | <p>Staff felt that TIC introduced significant uncertainty within the team about their practice. Regular meetings with staff were important to ensure consistent delivery of TIC. New staff, who were untrained, posed a risk to TIC consistency across the setting, which could lead to miscommunications. Training new starters was recognised as a key barrier to implementation, as there is limited time and money for services to be implemented and developed.</p> <p>Staff reported that since the implementation of TIC, there was an increase in the platforms available for talking through the impact of the work including reflective practices, debrief sessions and handovers. This reflects the organisational structures for practical support required by the TIC model.</p> <p>Open information sharing altered staff practice and</p> |

|                                         |                                            |                                                                                                                                                                                                                                                        |                                                                                                                                                                                                                                               |                                                                                                                                                                                                                                                                                                        |                   |                                                                                                                                                                                                                                                                                                    |                                                                                                                                                                                                                                                                                                                                                                                                                                                                                                                                                                                                                                                                                                                                                                                                                        |                                                                                                                                                                                                                                                                                                                                                                                                                                                                                                                                                                                                                                                                                     |                                                                                                                                                                                                                                                                                                                                                                                                                                                                                                                                                                                                                                                                                      |                                                                                                                                                                                                                                                                                                                                                                                                                                                                                                                                                                                                                                                                                                                                        |
|-----------------------------------------|--------------------------------------------|--------------------------------------------------------------------------------------------------------------------------------------------------------------------------------------------------------------------------------------------------------|-----------------------------------------------------------------------------------------------------------------------------------------------------------------------------------------------------------------------------------------------|--------------------------------------------------------------------------------------------------------------------------------------------------------------------------------------------------------------------------------------------------------------------------------------------------------|-------------------|----------------------------------------------------------------------------------------------------------------------------------------------------------------------------------------------------------------------------------------------------------------------------------------------------|------------------------------------------------------------------------------------------------------------------------------------------------------------------------------------------------------------------------------------------------------------------------------------------------------------------------------------------------------------------------------------------------------------------------------------------------------------------------------------------------------------------------------------------------------------------------------------------------------------------------------------------------------------------------------------------------------------------------------------------------------------------------------------------------------------------------|-------------------------------------------------------------------------------------------------------------------------------------------------------------------------------------------------------------------------------------------------------------------------------------------------------------------------------------------------------------------------------------------------------------------------------------------------------------------------------------------------------------------------------------------------------------------------------------------------------------------------------------------------------------------------------------|--------------------------------------------------------------------------------------------------------------------------------------------------------------------------------------------------------------------------------------------------------------------------------------------------------------------------------------------------------------------------------------------------------------------------------------------------------------------------------------------------------------------------------------------------------------------------------------------------------------------------------------------------------------------------------------|----------------------------------------------------------------------------------------------------------------------------------------------------------------------------------------------------------------------------------------------------------------------------------------------------------------------------------------------------------------------------------------------------------------------------------------------------------------------------------------------------------------------------------------------------------------------------------------------------------------------------------------------------------------------------------------------------------------------------------------|
|                                         |                                            |                                                                                                                                                                                                                                                        |                                                                                                                                                                                                                                               |                                                                                                                                                                                                                                                                                                        |                   |                                                                                                                                                                                                                                                                                                    | <p>was experienced as a sudden change. A stepped approach may have been less overwhelming. Staff reported that their uncertainty lessened as they began to see the benefits of TIC. Staff reported increased empathy towards service users after training, and felt they had more in common with service users than they initially thought.</p> <p>Staff also felt surer of what they had to offer service users, and more able to respond to situations of escalating risk.</p>                                                                                                                                                                                                                                                                                                                                       | <p>then much more empathetic towards service users.</p>                                                                                                                                                                                                                                                                                                                                                                                                                                                                                                                                                                                                                             |                                                                                                                                                                                                                                                                                                                                                                                                                                                                                                                                                                                                                                                                                      | <p>enabled staff to support service users. Systems for recording information were not in line with the TIC model requirements, which were to prioritise information about service user trauma and to make it accessible. This could pose a threat to the consistent delivery of the TIC model since it could prevent staff teams from accessing important information about service users.</p>                                                                                                                                                                                                                                                                                                                                         |
| <p>Tompkins &amp; Neale (2016) (74)</p> | <p>Cross-sectional correlational study</p> | <p>Population: Service users and staff</p> <p>Staff: N=18<br/>Service users: N=19</p> <p>Among service users: current clients: n=9<br/>former clients who had completed treatment: n=5<br/>former clients who had left the service prematurely n=5</p> | <p>Staff: Not stated</p> <p>Service users: Age: Range: 25-44 years.</p> <p>Ethnicity: White British n=16<br/>Other n=3.</p> <p>Sex: Women n= 9 (100%).</p> <p>Previously engaged within sex work: n=7</p> <p>Previously incarcerated: n=4</p> | <p>History of substance use issues ranging from 2 to 25 years</p> <p>n=7 were in treatment for Class A drug use</p> <p>n=7 were in treatment for alcohol use</p> <p>n=5 were in treatment for combined Class A drug and alcohol use.</p> <p>Length of stay: Initial funding for stays of 12 weeks,</p> | <p>Not stated</p> | <p>Staff roles: Key stakeholder s who had established the TIC service n=3<br/>Current TIC staff n=7<br/>Former TIC staff n= 3, staff working elsewhere in the organisation n = 5.</p> <p>Length of service: Range: between 4 months and 17 years</p> <p>Mean length of service the current TIC</p> | <p>Service users: Service users felt that the structured daily routine (including a consistent treatment timetable) added to their feelings of safety and contrasted with the unpredictability of their day-to-day life.</p> <p>Service users reported being unaware that the service was guided by a trauma-informed approach and did not know what the treatment involved before arriving. They were not expecting to have to learn about trauma, discuss their emotions, foster therapeutic alliances, or reflect on their emotional and behavioural history.</p> <p>All staff described strategies for maintaining their wellbeing, including not working overtime and taking sufficient breaks. Staff reported practising mindfulness and attending mutual aid groups to protect their own emotional welfare.</p> | <p>Service users' previous traumatic experiences and their difficulties opening up and sharing their experiences undermined their ability to trust, impacting their bonds with staff. They struggled to trust staff, be open, or cultivate relationships; service users acted defensively or vigilantly as a self-protection mechanism.</p> <p>Service users who left the service before completion reported not engaging with the programme or cultivating therapeutic alliances with staff. This was because they did not want, or did not feel able, to confront their traumatic experiences.</p> <p>Staff and service users felt that therapeutic relationships were at the</p> | <p>Staff felt that safety was promoted by organisational policies, such as preventing service users from having visitors. They also felt that the daily routines and activities supported a feeling of stability.</p> <p>Staff reported that service user safety was promoted when trauma-informed treatment groups were held in large spaces. Staff advocated the use familiar rooms which were women-only.</p> <p>The organisation commissioned a two-day intensive TIC staff training. Staff reported that the bespoke training supported them to deliver the manualised TIC programme, facilitate groups, take service users trauma histories into account, and learn how to</p> | <p>TIC requires a high ratio of staff to service users, as significant staff attention and support is required.</p> <p>At recruitment, it was highlighted that it is important to consider each candidate's experience and background, and how that complemented the needs of the service users. Managerial staff believed that staff should be women, and have personal qualities, experiences, and skills that would support them to work effectively with the service users. They recruited women who had their own experiences of addiction recovery and of working in this field previously.</p> <p>Stakeholders and staff noted that they would not work in this service indefinitely and that time off would be required if</p> |

|  |  |  |  |                                                                |  |                     |                                                                                                                                                                                                                                                                                                                                                                                                                                                                                                                                                                                                                                                                                                                                                                                                                                                                                                                                                                                                                                                                                                                                                                                                 |                                                                                                                                                                                                                                                                                                                                                                                                                                                                                                                                                                                                                                                                                                                                                                                                                                                                                                                                                                                 |                                                                                                                                                                                                                                                    |                                                                                                                                                                                                                                                         |
|--|--|--|--|----------------------------------------------------------------|--|---------------------|-------------------------------------------------------------------------------------------------------------------------------------------------------------------------------------------------------------------------------------------------------------------------------------------------------------------------------------------------------------------------------------------------------------------------------------------------------------------------------------------------------------------------------------------------------------------------------------------------------------------------------------------------------------------------------------------------------------------------------------------------------------------------------------------------------------------------------------------------------------------------------------------------------------------------------------------------------------------------------------------------------------------------------------------------------------------------------------------------------------------------------------------------------------------------------------------------|---------------------------------------------------------------------------------------------------------------------------------------------------------------------------------------------------------------------------------------------------------------------------------------------------------------------------------------------------------------------------------------------------------------------------------------------------------------------------------------------------------------------------------------------------------------------------------------------------------------------------------------------------------------------------------------------------------------------------------------------------------------------------------------------------------------------------------------------------------------------------------------------------------------------------------------------------------------------------------|----------------------------------------------------------------------------------------------------------------------------------------------------------------------------------------------------------------------------------------------------|---------------------------------------------------------------------------------------------------------------------------------------------------------------------------------------------------------------------------------------------------------|
|  |  |  |  | additional funding available to stay for an additional 12 week |  | service: 32 months. | <p>Staff described feeling initially unclear about what TIC entailed and felt they were learning as they went from their colleagues. Working together and establishing monthly mentoring and supervision supported staff to develop confidence and skills to deliver TIC and to reflect on their practice.</p> <p>Staff:<br/>Staff reported practising mindfulness or attending groups to maintain their recovery and protect their own emotional health.</p> <p>TIC staff needed to maintain their personal and professional boundaries to protect their own well-being and approach service users consistently.</p> <p>A challenge of TIC was staff avoiding becoming too emotionally or personally involved with service users, and feeling impacted by service users' experiences. This could potentially undermine their ability to deliver TIC.</p> <p>Participation in treatment at times unsettled service users, such as when they were new to the service, or when having difficulties with their emotional regulation. Due to the unpredictable nature of the setting, staff were conscious of the volatility of the environment and were ready to react quickly when necessary.</p> | <p>heart of how TIC worked. Service users felt most understood by staff members who had experienced addiction. Working collaboratively with service users to understand their needs was key.</p> <p>Staff stated that supporting service users in a trauma-informed way required them to be available, flexible, consistent, nurturing, and honest. However, staff recognised that they should not be overprotective of service users.</p> <p>Staff felt it was easier to develop therapeutic relationships with women who were fully detoxed, used to attending treatment groups, determined to stop using substances, and curious about exploring their trauma experiences alongside their addiction. These service users were more stable overall, had fewer immediate needs, and were more ready to engage with treatment.</p> <p>Central to feeling secure in the service was getting on with other women, developing relationships, and being in a homely atmosphere.</p> | <p>support service users' trauma responses.</p> <p>Despite the training, staff still reported that it had taken time to feel competent and confident in using TIC. Staff employed after the training had been delivered were also not trained.</p> | <p>unwell. Treatment quality might be affected if staff were absent, due to needing to take time off. During staff shortages, current staff workloads, which affected the quality of their work and increased their stress and feelings of burnout.</p> |
|--|--|--|--|----------------------------------------------------------------|--|---------------------|-------------------------------------------------------------------------------------------------------------------------------------------------------------------------------------------------------------------------------------------------------------------------------------------------------------------------------------------------------------------------------------------------------------------------------------------------------------------------------------------------------------------------------------------------------------------------------------------------------------------------------------------------------------------------------------------------------------------------------------------------------------------------------------------------------------------------------------------------------------------------------------------------------------------------------------------------------------------------------------------------------------------------------------------------------------------------------------------------------------------------------------------------------------------------------------------------|---------------------------------------------------------------------------------------------------------------------------------------------------------------------------------------------------------------------------------------------------------------------------------------------------------------------------------------------------------------------------------------------------------------------------------------------------------------------------------------------------------------------------------------------------------------------------------------------------------------------------------------------------------------------------------------------------------------------------------------------------------------------------------------------------------------------------------------------------------------------------------------------------------------------------------------------------------------------------------|----------------------------------------------------------------------------------------------------------------------------------------------------------------------------------------------------------------------------------------------------|---------------------------------------------------------------------------------------------------------------------------------------------------------------------------------------------------------------------------------------------------------|

|                              |                               |                                                                                                                      |                                                                                                                                                                                                                                                                                                         |                                                                                                                                                |            |     |                                                                                                                                                                                                                                                                                                                                                                                                                                                                                                                                                                                                               |                                                                                                                                                                                                                                               |                                                                                                                                                                                                                                                                                             |               |
|------------------------------|-------------------------------|----------------------------------------------------------------------------------------------------------------------|---------------------------------------------------------------------------------------------------------------------------------------------------------------------------------------------------------------------------------------------------------------------------------------------------------|------------------------------------------------------------------------------------------------------------------------------------------------|------------|-----|---------------------------------------------------------------------------------------------------------------------------------------------------------------------------------------------------------------------------------------------------------------------------------------------------------------------------------------------------------------------------------------------------------------------------------------------------------------------------------------------------------------------------------------------------------------------------------------------------------------|-----------------------------------------------------------------------------------------------------------------------------------------------------------------------------------------------------------------------------------------------|---------------------------------------------------------------------------------------------------------------------------------------------------------------------------------------------------------------------------------------------------------------------------------------------|---------------|
| Zweben et al. (2015)<br>(75) | Service report and evaluation | Population: Service users and staff<br><br>Total: n = 95<br>Intervention group: n=44<br>Non-intervention group: n=51 | Sex: Women: 100%                                                                                                                                                                                                                                                                                        | Alcohol misuse: 100%<br><br>Average length of stay was 206 days in the intervention group, compared to 128 days in the non-intervention group. | Not stated | N/A | Fewer participants in the intervention group reported psychological or emotional problems in the last 30 days (n=21, 41%), compared to entry to the programme (n=40, 78%)<br><br>Service users reported reduced drug or alcohol use in the past 30 days (43% on entry compared to 6% after six months).<br><br>Average length of stay was 206 days in the intervention group, compared to 128 days in the non-intervention group.<br><br>Reunifications with children approached 100%, as Family court and protective services learned of the service users' recovery.                                        | Staff reported that the trauma-informed program led some families to realise that other family members also needed mental health and/or substance abuse treatment, and many of these family members have been served by other EBCRP programs. | None measured                                                                                                                                                                                                                                                                               | None measured |
| Blair et al. (2017)<br>(50)  | Pre-post study                | Population: Service user<br><br>Baseline n=3884<br><br>Post intervention implementation n=8029                       | Service users: Age: Baseline: 4.9 % < 12 years 85.9 % > 13–65 9.2 % > 66<br>Study sample: 5.0 % < 12 years 87.2 % > 13–65 7.8 % > 66<br><br>Race: Baseline: 15.9 % Black 23.9 % Spanish/Hispanic 56.3 % White 3.9 % Other<br>Study sample: 16.5 % Black 3.6 % Spanish/Hispanic 55.3 % White 4.6 % Other | Not stated                                                                                                                                     | Not stated | N/A | Rate of seclusions decreased by 52% (p<0.01): Study period 213/8029 = 4.4/100 admissions vs. baseline 358/3884 = 9.2/100 admissions).<br><br>Rates of restraints decreased by 6 % (non-significant, p=0.44): baseline 213/3884 = 5.5/100 admissions, study period 412/8029 = 5.1/100 admissions.<br><br>Duration of seclusions per admission during the study period reduced by 27%.<br><br>Duration of restraints per admission increased by 52%.<br><br>Mean seclusion duration exceeded mean restraint duration during baseline (337.7 vs. 286.0 min, p=0.02) and during the study period (516.2 vs. 445.0 | None reported                                                                                                                                                                                                                                 | Of events which were formally reviewed (190 of 411 events, 50.6 % of which were seclusion and 49.4 % restraint events) the mean BVC score was 2.58 (categorised as “high risk”).<br><br>In 99.3 % (n = 120) the patient had a history of positive response to comfort/sensory interventions | None reported |

|                                                 |                                                                                                                                                    |                                                                                                                                                                 |                                                                                                     |            |            |            |                                                                                                                                                                                                                                                                                                                                                                                                                                                                                                                                                                                                                                                                                                                                                                                                                 |                                                                                                                                                                                                                   |               |               |
|-------------------------------------------------|----------------------------------------------------------------------------------------------------------------------------------------------------|-----------------------------------------------------------------------------------------------------------------------------------------------------------------|-----------------------------------------------------------------------------------------------------|------------|------------|------------|-----------------------------------------------------------------------------------------------------------------------------------------------------------------------------------------------------------------------------------------------------------------------------------------------------------------------------------------------------------------------------------------------------------------------------------------------------------------------------------------------------------------------------------------------------------------------------------------------------------------------------------------------------------------------------------------------------------------------------------------------------------------------------------------------------------------|-------------------------------------------------------------------------------------------------------------------------------------------------------------------------------------------------------------------|---------------|---------------|
|                                                 |                                                                                                                                                    |                                                                                                                                                                 | Sex:<br>Baseline:<br>49.7 % female<br>50.3 % male.<br>Study sample:<br>48.5 % female<br>51.5 % male |            |            |            | min, p = 0.27).<br><br>Comparing baseline to the study period, seclusion rates reduced, and the mean seclusion duration increased (337.7 to 516.2 min, p<0.01). From baseline to post-intervention the mean duration of restraints increased from 286.0 to 445.0 min (p<0.01).                                                                                                                                                                                                                                                                                                                                                                                                                                                                                                                                  |                                                                                                                                                                                                                   |               |               |
| Safety focussed tailored trauma-informed models |                                                                                                                                                    |                                                                                                                                                                 |                                                                                                     |            |            |            |                                                                                                                                                                                                                                                                                                                                                                                                                                                                                                                                                                                                                                                                                                                                                                                                                 |                                                                                                                                                                                                                   |               |               |
| Borckardt et al. (2011)<br><br>(52)             | Qualitative, data included: group observation; content analysis of agency documents and quantitative data; focus groups; and individual interviews | Population: Service users and staff<br><br>Sample size: Service user<br>Quality of Care questionnaires: n=446<br><br>Staff Quality of Care questionnaires = 340 | Not stated                                                                                          | Not stated | Not stated | Not stated | Baseline restraint rate (mean±SD): 0.027±0.018 per patient day<br>Follow up restraint rate (mean±SD): 005±0.002 per patient day.<br><br>The TIC model was associated with an 82.3% reduction in use of seclusion and restraint during baseline and follow-up (Wilcoxon=6.00, z=-2.65, p=0.008).<br><br>The implementation of change to the physical, therapeutic environment was associated with a significant reduction in seclusion and restraint (F=7.94, df=1 and 119, p=.006).<br><br>Perceptions of the therapeutic environment (M±SD):<br>Staff:<br>Baseline: 3.5±0.41<br>Follow up: 3.78±0.29<br>Service users:<br>Baseline: 3.72±0.16<br>Follow up: 3.94±0.18 (t=2.07, df=8, p=.04).<br><br>Rating of patient involvement in treatment planning (M±SD):<br>Baseline: 3.75±0.32<br>Follow up: 3.92±0.48 | Patients' ratings of the trauma sensitivity of the staff (mean±SD):<br>Baseline: 3.88±0.23<br>Follow up: 3.97±0.25<br><br>Ratings of trauma sensitivity (mean±SD):<br>Baseline: 3.85±0.23<br>Follow up: 3.92±0.21 | None measured | None measured |

|                      |                |                                                                                                                                        |                                                                                                                                                                           |                                                                                                                                                                                                                        |            |                                                                                                                   |                                                                                                                                                                                                                                                                                                                                                                                                                                                                                                                                                                                                                                                                                                                              |                                                                                                                                                                                                                                                                                                                                                                                                                                                                                      |                                                                                                                                                                                                                                                                                                                                                                                                                                                                                                              |                                                                                                                                                                                                                                                           |
|----------------------|----------------|----------------------------------------------------------------------------------------------------------------------------------------|---------------------------------------------------------------------------------------------------------------------------------------------------------------------------|------------------------------------------------------------------------------------------------------------------------------------------------------------------------------------------------------------------------|------------|-------------------------------------------------------------------------------------------------------------------|------------------------------------------------------------------------------------------------------------------------------------------------------------------------------------------------------------------------------------------------------------------------------------------------------------------------------------------------------------------------------------------------------------------------------------------------------------------------------------------------------------------------------------------------------------------------------------------------------------------------------------------------------------------------------------------------------------------------------|--------------------------------------------------------------------------------------------------------------------------------------------------------------------------------------------------------------------------------------------------------------------------------------------------------------------------------------------------------------------------------------------------------------------------------------------------------------------------------------|--------------------------------------------------------------------------------------------------------------------------------------------------------------------------------------------------------------------------------------------------------------------------------------------------------------------------------------------------------------------------------------------------------------------------------------------------------------------------------------------------------------|-----------------------------------------------------------------------------------------------------------------------------------------------------------------------------------------------------------------------------------------------------------|
|                      |                |                                                                                                                                        |                                                                                                                                                                           |                                                                                                                                                                                                                        |            |                                                                                                                   | <p>Staff trauma sensitivity rating (M±SD):<br/>Baseline: 4.25±0.10<br/>Follow up: 4.30±0.08</p> <p>Trauma sensitivity rating (M±SD):<br/>Baseline: 4.25±0.13<br/>Follow up: 4.22±0.12</p> <p>Patient perceptions of the physical environment (M±SD):<br/>Baseline: 3.72±0.16<br/>Follow up: 3.94±0.18<br/>(t=2.07, df=8, p= .04).</p> <p>Patient perceptions of their involvement in treatment planning (M±SD):<br/>Baseline: 3.88±.15<br/>Follow up: 4.08±.12<br/>(t=2.33, df=8, p=.02)</p>                                                                                                                                                                                                                                 |                                                                                                                                                                                                                                                                                                                                                                                                                                                                                      |                                                                                                                                                                                                                                                                                                                                                                                                                                                                                                              |                                                                                                                                                                                                                                                           |
| Jones (2021)<br>(66) | Pre-post study | <p>Service users and staff</p> <p>Service user: n=23 (57% of the patient population)<br/>Staff: n=13 (34% of the nurse population)</p> | <p>Age:<br/>Service users: M = 38.6<br/>Range = 19-55</p> <p>Staff:<br/>M = 43</p> <p>Sex:<br/>Service users: Women: n = 23 (100%)<br/>Staff: Women: n =11, Men n = 2</p> | <p>The service users are detained under the Mental Health Act, have mental disorders, and have been assessed as presenting an immediate risk to others.</p> <p>Mean length of service use: 6.6 months<br/>Range: 6</p> | Not stated | <p>Staff role:<br/>Named nurses</p> <p>Length of service:<br/>Mean employment: 9 years<br/>Range: 1-36 years.</p> | <p>The submissive position service users experience when in distress was described as reflective of roles enacted within past abusive relationships. Feeling lonely was characterised by many of the service users as being separated from family. The service users felt separate from their families and felt this was poorly addressed by the service. Service users described a fear of being discharged back into the communities where they had previously experienced significant personal traumas.</p> <p>Service users had greater insight into how their behaviours affect the people around them, and their work with named nurses increases their independent recognition of their distress and how to cope.</p> | <p>Service users described remorse and shame following aggressive behaviours towards staff, which led to distress and further aggression. Distress was felt by both service users and staff. Service users emphasised the physicality of their distress, but staff described the interventions as mostly cognitive or emotional. The nurses reflected that the intervention insufficiently met the service users' need for acquiring sensory awareness and self-soothing skills.</p> | <p>Sensory interventions were identified as a key need of the service users, and so were adopted by the NHS SW. Training in sensory interventions was incorporated as standard practice.</p> <p>The nurses reported that they needed specialist training, ongoing support and supervision to appropriately support service users.</p> <p>Lack of time was reported to be most damaging to the therapeutic relationship, and the nurses felt that much was expected from them in terms of the containment</p> | <p>Nurses feeling under pressure from the amount of work they had to complete, more so than the pressure felt as a result of the service users' distress. The pressures of the job were described as depriving the service users of the nurses' time.</p> |



|  |  |  |  |                    |  |  |                                                                                                                                                                                                                                                                                                                                                                                                                                                                                                                                                                                                                                                                                     |                                                                                                                                                                                                                                                                                                                                                                                                                                                                                                                                                                                                                                                                                                                                                                                                                                                                                                                                                                                                 |                                                                                                                                                                                                                                                      |  |
|--|--|--|--|--------------------|--|--|-------------------------------------------------------------------------------------------------------------------------------------------------------------------------------------------------------------------------------------------------------------------------------------------------------------------------------------------------------------------------------------------------------------------------------------------------------------------------------------------------------------------------------------------------------------------------------------------------------------------------------------------------------------------------------------|-------------------------------------------------------------------------------------------------------------------------------------------------------------------------------------------------------------------------------------------------------------------------------------------------------------------------------------------------------------------------------------------------------------------------------------------------------------------------------------------------------------------------------------------------------------------------------------------------------------------------------------------------------------------------------------------------------------------------------------------------------------------------------------------------------------------------------------------------------------------------------------------------------------------------------------------------------------------------------------------------|------------------------------------------------------------------------------------------------------------------------------------------------------------------------------------------------------------------------------------------------------|--|
|  |  |  |  | months - 20 years. |  |  | <p>Women reported feeling safer and more contained in the current TIC approach than previously.</p> <p>Staff acknowledged feeling insufficiently prepared for dealing with self-harm and they felt anger at the system for placing them in these difficult situations. Staff stated insufficient supervision was a key reason for nurses experiencing work-related post traumatic symptoms. Their coping strategies included being kind to and praising themselves for getting through the difficult moments.</p> <p>Nurses accepted the psychological traumas experienced at work, and expected to overcome these struggles alone and for them to continue nursing unaffected.</p> | <p>The lack of appropriate language and difficulty articulating distress was highlighted, and so the development of a distress vocabulary was recommended.</p> <p>Difficult therapeutic relationships left some service users feeling rejected and uncared for, while several nurses felt rejected and victimised.</p> <p>Involving the service users in staff training was reported by both staff and service users as beneficial in the development of a shared understanding and for enacting cultural change. Shared understanding was key in nurturing therapeutic relationships. Shared understanding reduced barriers that limited the service users' articulation. Therapeutic relationships were experienced as intensely emotional. Nurses wanted to connect with the service users over their shared victimisation experiences, and their inability to do this was felt as a barrier to building connections, and perpetuated power imbalances. Gaining knowledge of the service</p> | <p>of the service users and the support of colleagues.</p> <p>Service users perceived the staff training to be key in developing the motivation and ability to be compassionate, which goes beyond knowledge to cover interpersonal proficiency.</p> |  |
|--|--|--|--|--------------------|--|--|-------------------------------------------------------------------------------------------------------------------------------------------------------------------------------------------------------------------------------------------------------------------------------------------------------------------------------------------------------------------------------------------------------------------------------------------------------------------------------------------------------------------------------------------------------------------------------------------------------------------------------------------------------------------------------------|-------------------------------------------------------------------------------------------------------------------------------------------------------------------------------------------------------------------------------------------------------------------------------------------------------------------------------------------------------------------------------------------------------------------------------------------------------------------------------------------------------------------------------------------------------------------------------------------------------------------------------------------------------------------------------------------------------------------------------------------------------------------------------------------------------------------------------------------------------------------------------------------------------------------------------------------------------------------------------------------------|------------------------------------------------------------------------------------------------------------------------------------------------------------------------------------------------------------------------------------------------------|--|

|                                                                            |                                 |                                                                                                                     |                                                                                                                                                                                                                                         |     |            |                                                                                                                                                                      |                                                                                                                                                                                                                                                                                                                                                                                           |                                                                                                                                                                                                                                                                                                                                                                                                                                                                                                                                                                                             |               |                                                                                                                                                                                                                                                                                                                         |
|----------------------------------------------------------------------------|---------------------------------|---------------------------------------------------------------------------------------------------------------------|-----------------------------------------------------------------------------------------------------------------------------------------------------------------------------------------------------------------------------------------|-----|------------|----------------------------------------------------------------------------------------------------------------------------------------------------------------------|-------------------------------------------------------------------------------------------------------------------------------------------------------------------------------------------------------------------------------------------------------------------------------------------------------------------------------------------------------------------------------------------|---------------------------------------------------------------------------------------------------------------------------------------------------------------------------------------------------------------------------------------------------------------------------------------------------------------------------------------------------------------------------------------------------------------------------------------------------------------------------------------------------------------------------------------------------------------------------------------------|---------------|-------------------------------------------------------------------------------------------------------------------------------------------------------------------------------------------------------------------------------------------------------------------------------------------------------------------------|
|                                                                            |                                 |                                                                                                                     |                                                                                                                                                                                                                                         |     |            |                                                                                                                                                                      |                                                                                                                                                                                                                                                                                                                                                                                           | <p>users was easier if the service users felt that the process of gaining knowledge was a joint venture.</p> <p>Nurses experienced work traumas associated with patient behaviours, so it was important for nurses to see the service users as vulnerable to harm, to encourage the provision of compassionate care. When service users behaved aggressively, some nurses were more critical of their colleagues' lack of compassion.</p> <p>Engagement improved when nurses offered their time, as this discredited the service user belief that nurses were too busy to support them.</p> |               |                                                                                                                                                                                                                                                                                                                         |
| Trauma informed training intervention                                      |                                 |                                                                                                                     |                                                                                                                                                                                                                                         |     |            |                                                                                                                                                                      |                                                                                                                                                                                                                                                                                                                                                                                           |                                                                                                                                                                                                                                                                                                                                                                                                                                                                                                                                                                                             |               |                                                                                                                                                                                                                                                                                                                         |
| <p>Aremu, Hill, McNeal, Petersen, Swanberg, Delaney (2018)</p> <p>(46)</p> | <p>Qualitative focus groups</p> | <p>Population: Staff</p> <p>Total: N=32</p> <p>Initial training wave: n=11</p> <p>Second wave of training: n=22</p> | <p>Staff:</p> <p>Age (years):</p> <p>Initial training wave: M=41.7, SD=12.2</p> <p>Second training wave: M=45.95, SD=15.56</p> <p>Sex:</p> <p>Initial training wave:</p> <p>Women: n=6</p> <p>Men: n=5</p> <p>Second training wave:</p> | N/A | Not stated | <p>Initial training wave:</p> <p>Nurses: n=5</p> <p>Behavioural Health Technicians (BHTs): n=6</p> <p>Second training wave:</p> <p>Nurses: n=14</p> <p>BHTs: n=8</p> | <p>Initial training wave:</p> <p>PRE/post Combined Assessment of Psychiatric Environments (CAPE):</p> <p>Pre-test score: 32.4 (SD=5.3)</p> <p>Post-test score: 33.9 (SD = 5.9)</p> <p>No statistical difference (p=0.087)</p> <p>Pre/post scores MAVAS scale:</p> <p>Pre-test score: 66.5 (SD=6.6)</p> <p>Post-test score: 69.8 (SD = 5.6)</p> <p>No statistical difference (p=0.244)</p> | None measured                                                                                                                                                                                                                                                                                                                                                                                                                                                                                                                                                                               | None measured | <p>2015: Number of PRN intramuscularly (IM) medications administered per week: 11.9</p> <p>2017: Number of PRN IM medications administered per week: 12.1</p> <p>Following the second wave of training, PRN IM medications administered per week decreased.</p> <p>April: n=3.2 per week</p> <p>May: N=5.4 per week</p> |

|                     |             |                                                                                      |                                                                                                                                                                                                                                                                                                                             |                                                                                                                                                |            |                                                                                                                                                                                                   |                                                                                                                                                                                                                                                                                                                                                                                                                                                                 |                                                                                                         |                                                                                                                          |               |
|---------------------|-------------|--------------------------------------------------------------------------------------|-----------------------------------------------------------------------------------------------------------------------------------------------------------------------------------------------------------------------------------------------------------------------------------------------------------------------------|------------------------------------------------------------------------------------------------------------------------------------------------|------------|---------------------------------------------------------------------------------------------------------------------------------------------------------------------------------------------------|-----------------------------------------------------------------------------------------------------------------------------------------------------------------------------------------------------------------------------------------------------------------------------------------------------------------------------------------------------------------------------------------------------------------------------------------------------------------|---------------------------------------------------------------------------------------------------------|--------------------------------------------------------------------------------------------------------------------------|---------------|
|                     |             |                                                                                      | <p>Women: n=21<br/>Men: n=1</p> <p>Initial training:<br/>Associate's degree: n=7 (63.6%).<br/>Second training wave: High school: n=7, (31.8%)<br/>Associate's degree: n=6 (27.3%)<br/>College: n=3 (13.6%)<br/>Baccalaureate in nursing: n=5 (22.7%)<br/>Masters: n=1 (4.5%)</p>                                            |                                                                                                                                                |            | <p>Length of service:<br/>Initial training wave: Years working in psychiatry (mean): 7.3 years (SD=7.4).<br/>Second training wave: Years working in psychiatry (mean): 8.19 years (SD=10.96).</p> | <p>Second wave of training:<br/>PRE/post on the CAPE:<br/>Pre-test score: 31.6 (SD = 3.2)<br/>Post-test score: 32.6 (SD = 4.9)<br/>No statistical difference (p=0.323)</p> <p>Pre/post scores MAVAS scale:<br/>Pre-test score: 70.2 (SD = 11.9)<br/>Post-test score: 69.2 (SD = 10.1)<br/>Statistically significant difference (p=0.010)</p>                                                                                                                    |                                                                                                         |                                                                                                                          |               |
| Gonshak (2011) (61) | Qualitative | <p>Population: Service users and staff</p> <p>Service users: n=92<br/>Staff: n=7</p> | <p>Age (years)<br/>Service users: Mean 16.2<br/>Range 11-18<br/>Staff: Range: 28-61</p> <p>Ethnicity:<br/>Service users: Caucasian: 67%<br/>African American: 31%<br/>Hispanic: 2%<br/>Staff: Caucasian: n=5<br/>African American: n=1<br/>Other: n=1</p> <p>Sex:<br/>Service users: 100% female<br/>Staff: 100% female</p> | <p>Many service users reportedly had emotional and behaviour disabilities, mild intellectual disability, and specific learning disability.</p> | Not stated | Not stated                                                                                                                                                                                        | <p>Staff:</p> <p>Trauma informed beliefs (mean, SD):<br/>Pre-training: 3.3 (0.38)<br/>Post-training: 3.4 (0.44).</p> <p>Risking Connections Knowledge (mean, SD):<br/>Pre-training: 0.52 (0.20)<br/>Post-training: 0.55 (0.24)</p> <p>Service users:</p> <p>No statistically significant differences in reported trauma symptomology pre to post TIC training (t=0.58, p=0.56) or in their perception of the student-teacher relationship (t=-0.83, p=.41).</p> | <p>CLASS - Emotional support (mean, SD):<br/>Pre-training: 5.0 (1.26)<br/>Post-training: 4.8 (0.91)</p> | <p>Staff:</p> <p>Risking Connections Fidelity (mean, SD):<br/>Pre-training: 2.1 (0.57)<br/>Post-training: 2.1 (0.38)</p> | None measured |

|                                                              |                                                                |                                                                                                    |                                                                                         |                                                                                    |            |                                                                                                                                                                                                                                                                                                              |                                                                                                                                                                                                                                                                                                                                                                                                                                                                                                                                                                                                                                                                                                                                                                                                                                                                  |                                                                                                                                                                                                                                                                                                                                                                                                                                                                                 |                                                                                                                                                                                                                                                                                                                         |               |
|--------------------------------------------------------------|----------------------------------------------------------------|----------------------------------------------------------------------------------------------------|-----------------------------------------------------------------------------------------|------------------------------------------------------------------------------------|------------|--------------------------------------------------------------------------------------------------------------------------------------------------------------------------------------------------------------------------------------------------------------------------------------------------------------|------------------------------------------------------------------------------------------------------------------------------------------------------------------------------------------------------------------------------------------------------------------------------------------------------------------------------------------------------------------------------------------------------------------------------------------------------------------------------------------------------------------------------------------------------------------------------------------------------------------------------------------------------------------------------------------------------------------------------------------------------------------------------------------------------------------------------------------------------------------|---------------------------------------------------------------------------------------------------------------------------------------------------------------------------------------------------------------------------------------------------------------------------------------------------------------------------------------------------------------------------------------------------------------------------------------------------------------------------------|-------------------------------------------------------------------------------------------------------------------------------------------------------------------------------------------------------------------------------------------------------------------------------------------------------------------------|---------------|
| Niimura, Nakanishi, Okumura, Kawano & Nishida (2019)<br>(69) | Service evaluation                                             | Population: Staff<br>N = 65                                                                        | Age (years):<br>Mean: 42.2<br>SD: 11.9<br><br>Sex:<br>Women n=56 (86%)<br>Men n=9 (14%) | N/A                                                                                | Not stated | Registered nurse n=53 (82%)<br>Occupational therapist n=5 (7.7%)<br>Psychiatric social worker n=3 (4.6%)<br>Practical nurse n=2 (3.1%)<br>Other n=2 (3.1%)<br><br>Length of service in current role:<br>Mean: 16.2 years<br>SD: 11.3<br>Length of service in psychiatric field<br>Mean: 7.8 years<br>SD: 7.0 | Mean score of the Attitude Related Trauma-Informed Care scale scores significantly from 5.1 during pre-TIC training to 5.5 after TIC training (mean difference: 0.4; 95% CI 0.3–0.5) and 5.4 three months later (mean difference: 0.3; 95% CI 0.2–0.4). 48% reported that they had implemented TIC practices after training (n= 27/56).<br><br>The most frequently reported clinical practice was ‘assessing patients’ behaviour based on TIC’ (37%). 50% of participants felt that they had ‘limited skills and/or experience of TIC’ and lacked confidence to implement TIC.<br><br>86% of staff who did not implement TIC into their practice reported barriers to doing so, such as a lack of time (reported by 40%), limited skills and/or confidence (reported by 24%) and lack of opportunities to implement TIC in their current role (reported by 40%). | Modifying communication with patients based on TIC and managing patients’ behaviours without being coercive was implemented by 19% of staff.<br><br>Staff paid attention to their tone of voice, volume, and/or the choice of words when communicating with service users.<br><br>n=7 (44%) staff members reported difficulties sharing information regarding TIC with colleagues, while three others attempted sharing TIC training, but their colleagues were not interested. | None measured                                                                                                                                                                                                                                                                                                           | None measured |
| Other trauma informed models                                 |                                                                |                                                                                                    |                                                                                         |                                                                                    |            |                                                                                                                                                                                                                                                                                                              |                                                                                                                                                                                                                                                                                                                                                                                                                                                                                                                                                                                                                                                                                                                                                                                                                                                                  |                                                                                                                                                                                                                                                                                                                                                                                                                                                                                 |                                                                                                                                                                                                                                                                                                                         |               |
| Beckett, Holmes, Phipps, Patton & Molloy (2017)<br>(49)      | Non-randomised control design (with nested process evaluation) | Population: N/A<br>27-bed ward, divided into a six-bed high dependency unit and 21-bed acute unit. | Not stated.                                                                             | Average length of stay: 11 days<br><br>Monthly separation rate: >70 service users. | Not stated | N/A                                                                                                                                                                                                                                                                                                          | After de-escalation and safety training, combined with training on trauma-informed perspectives, nursing staff’s confidence increased and they felt motivated to engage therapeutically with service users who were extremely distressed.<br><br>Nurses exhibited a greater awareness of childhood and adult adversity, and this led to greater understanding, compassion, and respect for service users.                                                                                                                                                                                                                                                                                                                                                                                                                                                        | There was reduced use of clinical jargon and derogatory descriptions of service users, and staff increased their efforts to focus on service user strengths during clinical discussions or handovers.                                                                                                                                                                                                                                                                           | Management ensured regular opportunities for informal staff and service user groups to meet to discuss their concerns, experiences, and ideas for improvement. Admission information was improved to make the process more transparent.<br><br>A sexual safety training module was developed and attended by all staff, | None measured |

|                                               |                                                                |                                                       |                                                                                    |     |                                                                    |                                                                        |                                                                                                                                                                                                                                                                                                                                                                                                                                                                                                                                                                                                                                                                                                                        |               |                                                                                                                                                                                                                                                                                                                                               |               |
|-----------------------------------------------|----------------------------------------------------------------|-------------------------------------------------------|------------------------------------------------------------------------------------|-----|--------------------------------------------------------------------|------------------------------------------------------------------------|------------------------------------------------------------------------------------------------------------------------------------------------------------------------------------------------------------------------------------------------------------------------------------------------------------------------------------------------------------------------------------------------------------------------------------------------------------------------------------------------------------------------------------------------------------------------------------------------------------------------------------------------------------------------------------------------------------------------|---------------|-----------------------------------------------------------------------------------------------------------------------------------------------------------------------------------------------------------------------------------------------------------------------------------------------------------------------------------------------|---------------|
|                                               |                                                                |                                                       |                                                                                    |     |                                                                    |                                                                        | After three years, seclusion rates reduced by 80% and use of security staff was minimised. The duration of seclusion incidents mostly reduced to <60 minute.                                                                                                                                                                                                                                                                                                                                                                                                                                                                                                                                                           |               | leading to revised ward policy and procedure. Therapeutic groups were improved, and a broader therapeutic range of services were provided.<br><br>A staff working group investigated the use of medication in the unit and conducted a literature review to identify best practice, leading to revisions of ward protocols on rapid sedation. |               |
| Isobel & Edwards (2017) (64)                  | Qualitative evaluation of implementation of a TIC intervention | Population: Staff<br>n=5                              | Not stated (due to small sample size)                                              | N/A | Not stated                                                         | Mental health nurses<br><br>Length of service:<br>Range: 1 – 25+ years | All nurses hoped hopeful that TIC would improve nursing care, making it more consistent and cohesive while also more individualised and flexible.<br><br>Staff agreed that change needed to be slow and positively framed to be accepted and implemented successfully. TIC wasn't always fully understood, and some nurses felt that the introduction of TIC was a criticism of their current approaches, which were being labelled as traumatising. Nurses reported wanting clarity, consistency, and clear role expectations within TIC.<br><br>Some nurses questioned whether the trauma informed changes were significant. Others feared that a lack of safety could arise from changes to long standing practise. | None measured | None measured                                                                                                                                                                                                                                                                                                                                 | None measured |
| Jacobowitz, Moran, Best, & Mensah (2015) (65) | In-depth case study approach                                   | Population: Staff<br><br>N=172<br>(n=158 had complete | Age (n=169)<br>< 21 0.6%<br>21–30 36.1%<br>31–40 18.3%<br>41–50 20.7%<br>51+ 24.3% | N/A | Staff (n=160):<br>Verbal Assault<br>Last month:<br>M 4.4<br>SD 6.8 | Inpatient psychiatric health care workers, that consisted              | Post-traumatic stress symptoms increase as the length of time between attending trauma-informed care meetings increases ( $\beta=0.021$ , $t=2.16$ , $p<0.03$ ), and signs of burnout                                                                                                                                                                                                                                                                                                                                                                                                                                                                                                                                  | None measured | None measured                                                                                                                                                                                                                                                                                                                                 | None measured |

|                                 |                |               |                                                                                                                                                                                                                                                                                                                                                                                                                                                                                                                                                                     |                       |                                                                                                                                                                                                                                                                                                                                                                                                                       |                                                                                                                                                                                                                                                                                                                                                          |                                                                                                                                                                                                                                                                                                                                                                                                                                                                                                                |                                                                      |     |     |
|---------------------------------|----------------|---------------|---------------------------------------------------------------------------------------------------------------------------------------------------------------------------------------------------------------------------------------------------------------------------------------------------------------------------------------------------------------------------------------------------------------------------------------------------------------------------------------------------------------------------------------------------------------------|-----------------------|-----------------------------------------------------------------------------------------------------------------------------------------------------------------------------------------------------------------------------------------------------------------------------------------------------------------------------------------------------------------------------------------------------------------------|----------------------------------------------------------------------------------------------------------------------------------------------------------------------------------------------------------------------------------------------------------------------------------------------------------------------------------------------------------|----------------------------------------------------------------------------------------------------------------------------------------------------------------------------------------------------------------------------------------------------------------------------------------------------------------------------------------------------------------------------------------------------------------------------------------------------------------------------------------------------------------|----------------------------------------------------------------------|-----|-----|
|                                 |                | information ) | <p>Race (n=169)</p> <p>African American 29.6 %</p> <p>Asian 0.6 %</p> <p>Caribbean 13.6%</p> <p>Pacific Islander 1.2%</p> <p>Latino 6.55 %</p> <p>White 42</p> <p>Male 33.1%</p> <p>Female 66.9%</p> <p>Last Trauma Informed Care Meeting (n=160)</p> <p>Last week 25.0%</p> <p>Last month 19.4%</p> <p>Last 3 months 16.3%</p> <p>Last 6 months 21.9%</p> <p>Last 12 months 9.4%</p> <p>12+ months 8.1%</p> <p>Education (n=172):</p> <p>High school 13.4%</p> <p>1-3 years of college 43.6%</p> <p>Bachelors 27.3%</p> <p>Masters 13.4%</p> <p>Doctorate 2.3%</p> |                       | <p>Last 6 months M 15.7 SD 25.5</p> <p>Lifetime M 18.3 SD 17.0</p> <p>Verbal threat Last month M 1.5 SD 2.8</p> <p>Last 6 months M 3.4 SD 6.1</p> <p>Lifetime M 13.7 SD 16.8</p> <p>Physical attack Last month M 0.8 SD 1.8</p> <p>Last 6 months M 2.0 SD 3.4</p> <p>Lifetime M 10.0 SD 13.7</p> <p>Severe physical attack Last month M 0.3 SD 1.0</p> <p>Last 6 months M 0.8 SD 1.8</p> <p>Lifetime M 1.9 SD 3.2</p> | <p>of registered nurses (RNs), psychiatric aides (unlicensed paraprofessionals that assist the RNs), assistant counsellors (group therapists), psychiatrist s, case coordinators (discharge planners), and therapeutic rehabilitation specialists (psychiatric rehabilitation).</p> <p>Years of experience: &lt;1, 7% 1-2, 20.3% 3-4, 22.7% 5+ 49.4%</p> | <p>increase (<math>\beta=0.014</math>, <math>t=4.12</math>, <math>p&lt;0.00</math>).</p> <p>A model predicting post-traumatic stress symptoms (PTSS) among staff included the total frequency of severe physical attacks, staff age, TIC meeting attendance, and compassion fatigue. This model explained 23.4% of the variance with respect to PTSS.</p> <p>There was a significant correlation between TIC meeting attendance and adjusted PCL-C scores (<math>r = -0.156</math> <math>p&lt;0.05</math>)</p> |                                                                      |     |     |
| Prytherch, Cooke & Marsh (2020) | Pre-post study | Service users | Age: Range: 22-53 years                                                                                                                                                                                                                                                                                                                                                                                                                                                                                                                                             | Length of stay: Women | Not stated                                                                                                                                                                                                                                                                                                                                                                                                            |                                                                                                                                                                                                                                                                                                                                                          | Service users acknowledged that the medical-custodial approach experienced in hospital was                                                                                                                                                                                                                                                                                                                                                                                                                     | Service users described that the formation of trusting relationships | N/A | N/A |

|      |  |     |                                                                                                                                       |                                                                                                                                                                                                                                 |  |  |                                                                                                                                                                                                                                                                                                                                                                                                                                                                                                                                                                                                                                                                                                                                                                                                                                                                                                                                                                                                                             |                                                                                                                                                                                                                                                                                                                                                                                                                                                                                                                                                                                                                                                                                                  |  |  |
|------|--|-----|---------------------------------------------------------------------------------------------------------------------------------------|---------------------------------------------------------------------------------------------------------------------------------------------------------------------------------------------------------------------------------|--|--|-----------------------------------------------------------------------------------------------------------------------------------------------------------------------------------------------------------------------------------------------------------------------------------------------------------------------------------------------------------------------------------------------------------------------------------------------------------------------------------------------------------------------------------------------------------------------------------------------------------------------------------------------------------------------------------------------------------------------------------------------------------------------------------------------------------------------------------------------------------------------------------------------------------------------------------------------------------------------------------------------------------------------------|--------------------------------------------------------------------------------------------------------------------------------------------------------------------------------------------------------------------------------------------------------------------------------------------------------------------------------------------------------------------------------------------------------------------------------------------------------------------------------------------------------------------------------------------------------------------------------------------------------------------------------------------------------------------------------------------------|--|--|
| (28) |  | N=8 | <p>Race:<br/>White British n=5, British Chinese n=1<br/>Black African n=1<br/>Greek Cypriot n=1</p> <p>Sex:<br/>Women: n=8 (100%)</p> | <p>stayed two weeks in the crisis house on average, the maximum stay was four weeks.</p> <p>n=7 service users had been admitted to hospital within the last four years.</p> <p>n=1 had been admitted nine years previously.</p> |  |  | <p>effective in keeping service users alive, but wasn't emotionally supporting them long-term. The trauma informed crisis house prioritised the cultivation of therapeutic relationships and permanent emotional healing.</p> <p>Participants reported that it was difficult to be directly asked about trauma. However, it became easier subsequently to name and discuss their experience of trauma, though talking had limits. One participant did not identify as a trauma survivor, and did not feel deserving of her distress. Although the service users felt cared for, TIC was mainly focused on individual support and failed to address wider societal injustices that contribute to distress.</p> <p>Service users reported experiencing more freedom, privacy and comfort in the crisis house compared to in hospital.</p> <p>Having a safety plan which enabled service users to leave the house, supported them to maintain social roles such as employment, which helped to avoid institutionalisation.</p> | <p>was key in developing strategies to stay safe. Service users felt able to discuss their feelings with staff, to hand blades in, or to ask for support.</p> <p>All service users valued the regular one-to-one meetings with consistent staff members in the crisis house. The women reported feeling safer in a women-only environment, and it made it easier to be open. When given sufficient time and individual attention to open up and bond, the service users felt valued and were able to be honest. Feeling cared for and also being involved in their care decisions enabled a trust to develop with staff. Trusting relationships were described as healing for service users.</p> |  |  |
|------|--|-----|---------------------------------------------------------------------------------------------------------------------------------------|---------------------------------------------------------------------------------------------------------------------------------------------------------------------------------------------------------------------------------|--|--|-----------------------------------------------------------------------------------------------------------------------------------------------------------------------------------------------------------------------------------------------------------------------------------------------------------------------------------------------------------------------------------------------------------------------------------------------------------------------------------------------------------------------------------------------------------------------------------------------------------------------------------------------------------------------------------------------------------------------------------------------------------------------------------------------------------------------------------------------------------------------------------------------------------------------------------------------------------------------------------------------------------------------------|--------------------------------------------------------------------------------------------------------------------------------------------------------------------------------------------------------------------------------------------------------------------------------------------------------------------------------------------------------------------------------------------------------------------------------------------------------------------------------------------------------------------------------------------------------------------------------------------------------------------------------------------------------------------------------------------------|--|--|

## Discussion

### Key findings

TIC approaches implemented in acute, crisis, emergency and residential mental health settings were broad and varied. Studies that utilised either the Six Core Strategies model (83) or the Sanctuary Model (84) followed a clear structure to enact organisation and clinical change. Other studies implemented TIC models tailored to their specific settings, some with a particular emphasis on improving safety. The value of staff training was highlighted across studies, but the content of training was often described in limited detail, making it difficult to draw inferences around its comprehensiveness. Two principles from Sweeney and Taggart (2018) that were often underrepresented in the TIC models were i) recognising social traumas and the intersectionality of multiple traumas and ii) working in partnership with trauma survivors to design, deliver and evaluate services. This indicates missed opportunities to use lived experience input to develop services, particularly for service user groups who have experienced multiple and social traumas. Trauma itself was poorly defined, raising the question of whether TIC implementation can be truly meaningful without a clear framework of what trauma itself entails.

Service users felt connected to their traumatic experiences and the implementation of TIC practice improved their ability to communicate their traumas. However, this could be a difficult process, and it is important to highlight that service users should not be required to share their experiences of trauma . The focus of TIC approaches in relation to empowering service users should also extend to giving them autonomy over when and how they disclose their traumatic experiences to staff (91). While service users felt cared for, trusting, and trusted by staff working in TIC services, some elements of distressing service user experiences were not reflected in the TIC materials e.g., lack of access to housing or benefits, indicating a need for closer adaptation of TIC to the needs of service user populations.

Staff initially felt overwhelmed, anxious, criticised, and even reluctant at the introduction of TIC, though TIC positively influenced staff empathy, compassion, and wellbeing. Time was a key factor for implementation, particularly time to allow for staff to build their skills and confidence. Once skills were developed, staff felt proud and satisfied with their roles. There were potential implications of delivering TIC for staff with histories of trauma also, e.g., providing staff with support and supervision to process those experiences. Future research could explore how these changes impact on staff turnover, a key concern in providing consistent care in inpatient and residential care settings.



Reductions in restraint and seclusion were observed across settings, although the quality of evidence is limited as most studies are pre/post designs and lacked a comparison group. However, a broader question remains around whether services that continue to use restraint and seclusion (even in a reduced capacity) can be considered trauma informed.

There was a lack of economic evidence available. However, if TIC is reducing rates of seclusion and restraint, reducing length of stays, as well as creating a more therapeutic environment (as reported in this review), this may have a positive impact, as conflict is costly (92), while increased patient satisfaction is associated with reduced costs (93). However, there was also a lack of data on carers, perhaps due to our focus on specific settings, and very little evidence on hospital emergency departments (where care may be experienced as traumatising (94)), and on community-based crisis assessment services, home treatment, or acute day units, which future research could investigate.

### Strengths and limitations

Our broad literature search retrieved evidence on TIC approaches in a variety of mental health settings, providing insight into implementation and outcomes by setting. By nature of reviewing existing academic and grey literature, we are behind the curve of survivor thought and experience of TIC implementation. For example, information on the potential harms of poorly implemented TIC has been documented by people with lived experience (95), such as feeling required or coerced to confront their traumatic experiences. There was heterogeneity in the reporting of outcome measures across studies, limiting the generalisability of our conclusions. There were significant methodological weaknesses across the included studies; they were primarily cross sectional, with few employing a control group or a randomised design, limiting our ability to draw causal conclusions about the impacts of TIC. There was more data on residential mental health care settings compared to other settings, mirroring other review findings (96); this may be due to their longer-term nature, which may be more amenable to the implementation and evaluation of TIC. This limits our understanding of TIC implementation and outcomes in other settings.

### Implications for policy

A central tenet of TIC is empathy and understanding of the role of trauma in shaping mental health outcomes, which are positioned as being at the core of how mental health services can best support service users. Arguably, these principles should be a basic requirement of all mental health services, whether labelled as trauma-informed or not. Introducing TIC into services may be a method by which basic practices can be integrated and maintained in a structured way (6). This requires system-level

change, which may be both time and financially resource intensive, although we identified little economic evidence.

### Implications for practice

Delivering TIC in inpatient and residential settings requires clear and decisive leadership as well as clear staff roles(97). In addition, TIC needs to be implemented, reviewed and evaluated collaboratively with service users to ensure it is delivering safe and appropriate care, otherwise services may continue to cause significant harm (95). TIC could be included in pre-registration education across healthcare professions (98, 99) and used to inform and shape existing clinical practices. New starters may benefit from training as part of their inductions, and consistent staff supervision also supports the effective delivery of TIC (100). These requirements result in a sustainability challenge as the creation and delivery of training is resource intensive, and staff turnover rates are high (101). Finally, clinicians should be conscious not to cause further harm through the delivery of TIC (95), and that confronting and dealing with trauma should always be the choice of the service user, and receipt of TIC should not be dependent on service user willingness to engage with their traumatic experiences.

### Implications for future research

We have identified significant evidence gaps around TIC implementation in non-inpatient acute care, including A&E, crisis teams, crisis houses, and acute day hospitals. Most of the evidence is concentrated within the USA, and there is a paucity of data on TIC elsewhere. Very few studies included control or comparison groups, crucially limiting our ability to determine the nature and strength of change due to TIC. With the development of other approaches to improving inpatient care, for example, Safewards (102), robust research methodologies must clarify the specific advantages of TIC. Future primary research could explore TIC in acute and crisis mental health care settings, where it may be more difficult to implement a consistent and sustainable TIC approach as service users are engaged for shorter time periods. Future research could also consider the potential negative and harmful impacts of TIC. The present study could be extended to map the use of TIC in forensic settings, where poor mental health and experiences of trauma are also highly prevalent.

## Conclusion

This scoping review has demonstrated the range of TIC approaches used in acute, crisis, and residential settings as well as a range of outcomes relating to service users and staff experiences, attitudes, and practises. TIC implementation requires commitment and strong leadership to enact organisational change, as well as appropriate training and supervision for staff and the involvement of service users in the design and delivery of approaches. Future research requires robust methods to accurately

measure the impacts of TIC approaches and their potential benefits over existing care practices, through the utilisation of comparator conditions to TIC models. Research would also benefit from exploring how TIC impacts on carers; how trauma is understood in emergency services (settings that are frequently used by trauma survivors); and prioritising the expertise and views of those with lived experience with respect to how best to deliver TIC across mental health services.

## Lived experience commentary

Written by LM and RRO.

As survivors of trauma from both within and outside mental health services, we welcome approaches which recognise its importance, and are pleased to see the range of perspectives which have been studied. We hope future research can engage with more work from outside the global north, which dominates in this paper.

However, from reading this literature, we do not know whether as patients we could always distinguish a trauma-informed service from any other - particularly given implementation challenges described in services with high levels of inconsistency, agency staff, new starters, and/or staff scepticism. At times trauma-informed care seems to be a means to an end which should already be universal, i.e., treating service users with respect and supporting our autonomy.

It does not particularly matter to us whether a service is trauma-informed on paper if the support staff change day by day and cannot or will not put the theory into practice. Nor does it matter that staff believe themselves to be validating our trauma, if they also retain power: if we can be physically held down; if the versions of ourselves written in their notes overwrite our autobiographies; if we have to surrender control of our most painful experiences in exchange for care. We have experienced some of these; we have heard about others happening to our peers, sometimes in the name of TIC (e.g. <https://www.psychiatryisdrivingmemad.co.uk/post/trauma-informed-care-left-me-more-traumatised-than-ever>).

We welcome several studies showing reductions in restraint in trauma-informed environments (although note that this was not a universal finding). But we question whether a system founded on such violence can be anything other than traumatising in its own right. A version of TIC implemented in an under-resourced, fundamentally carceral system carries all the risks of harm associated with that system - with the added gaslighting of framing it as trauma-informed harm. As such, everyone involved in providing care they view as trauma-informed should consider what power over our stories and our bodies they are willing and able to give back.

## Declaration of interests

No interests to declare.

## Funding

This paper presents independent research commissioned and funded by the National Institute for Health Research (NIHR) Policy Research Programme, conducted by the NIHR Policy Research Unit (PRU) in Mental Health. The views expressed are those of the authors and not necessarily those of the NIHR, the Department of Health and Social Care or its arm's length bodies, or other government departments. JS was funded by an NIHR pre-doctoral clinical academic fellowship (2021-2022) and by the Psychiatry Research Trust in partnership with KCL (2022-2023).

## Acknowledgements

We would like to thank the NIHR LEWG for their contributions to this project, including researcher T.K. We would like to acknowledge the academic and lived experience experts who shared resources with us, and recommended papers for inclusion.

## Author Contribution

Formulating the research question(s): SJ, KT, AS, KS, PB, PM, NVSJ, RS, RRO, TJ, PN, TK, LM

Designing the study: SJ, KT, AS, KS, PB, PM, NVSJ, RS, LM, RRO, TJ, PN, TK

Conducting the study (including analysis): KS, KT, EM, JS, UF, FA, PB, SC, VT, MS, NVSJ, JG

Writing and revising the paper: KS, KT, SJ, AS, EM, JS, RS, UF, PB, SC, VT, MS, NVSJ, RA, JG, RRO

## Data Availability

All data used is publicly available in the published papers included in this study.

## References

1. Edwards DW, Scott CL, Yarvis RM, Paizis CL, Panizzon MS. Impulsiveness, impulsive aggression, personality disorder, and spousal violence. *Violence and victims*. 2003;18(1):3.
2. Trevillion K, Oram S, Feder G, Howard LM. Experiences of Domestic Violence and Mental Disorders: A Systematic Review and Meta-Analysis. *PLOS ONE*. 2012;7(12):e51740.
3. Chen LP, Murad MH, Paras ML, Colbenson KM, Sattler AL, Goranson EN, et al., editors. Sexual abuse and lifetime diagnosis of psychiatric disorders: systematic review and meta-analysis. Mayo clinic proceedings; 2010: Elsevier.
4. Hughes K, Bellis MA, Hardcastle KA, Sethi D, Butchart A, Mikton C, et al. The effect of multiple adverse childhood experiences on health: a systematic review and meta-analysis. *The Lancet Public Health*. 2017;2(8):e356-e66.
5. Huang LN, Flatow R, Biggs T, Afayee S, Smith K, Clark T, et al. SAMHSA's Concept of Trauma and Guidance for a Trauma-Informed Approach. 2014.
6. Sweeney A, Taggart D. (Mis) understanding trauma-informed approaches in mental health. Taylor & Francis; 2018. p. 383-7.
7. Cohodes EM, Kribakaran S, Odriozola P, Bakirci S, McCauley S, Hodges H, et al. Migration - related trauma and mental health among migrant children emigrating from Mexico and Central America to the United States: Effects on developmental neurobiology and implications for policy. *Developmental psychobiology*. 2021;63(6):e22158.
8. Khalifeh H, Moran P, Borschmann R, Dean K, Hart C, Hogg J, et al. Domestic and sexual violence against patients with severe mental illness. *Psychological medicine*. 2015;45(4):875-86.
9. Oram S, Flynn SM, Shaw J, Appleby L, Howard LM. Mental illness and domestic homicide: a population-based descriptive study. *Psychiatric services*. 2013;64(10):1006-11.
10. Kessler RC, McLaughlin KA, Green JG, Gruber MJ, Sampson NA, Zaslavsky AM, et al. Childhood adversities and adult psychopathology in the WHO World Mental Health Surveys. *The British journal of psychiatry*. 2010;197(5):378-85.
11. Fisher H, Morgan C, Dazzan P, Craig TK, Morgan K, Hutchinson G, et al. Gender differences in the association between childhood abuse and psychosis. *The British Journal of Psychiatry*. 2009;194(4):319-25.
12. Inyang B, Gondal FJ, Abah GA, Dhandapani MM, Manne M, Khanna M, et al. The role of childhood trauma in psychosis and schizophrenia: a systematic review. *Cureus*. 2022;14(1).
13. Bebbington PE, Bhugra D, Brugha T, Singleton N, Farrell M, Jenkins R, et al. Psychosis, victimisation and childhood disadvantage: evidence from the second British National Survey of Psychiatric Morbidity. *The British Journal of Psychiatry*. 2004;185(3):220-6.
14. Porter C, Palmier - Claus J, Branitsky A, Mansell W, Warwick H, Varese F. Childhood adversity and borderline personality disorder: A meta - analysis. *Acta Psychiatrica Scandinavica*. 2020;141(1):6-20.
15. Dale O, Sethi F, Stanton C, Evans S, Barnicot K, Sedgwick R, et al. Personality disorder services in England: findings from a national survey. *BJPsych Bulletin*. 2017;41(5):247-53.
16. Campbell K, Clarke K-A, Massey D, Lakeman R. Borderline Personality Disorder: To diagnose or not to diagnose? That is the question. *International Journal of Mental Health Nursing*. 2020;29(5):972-81.
17. Evans S, Sethi F, Dale O, Stanton C, Sedgwick R, Doran M, et al. Personality disorder service provision: a review of the recent literature. *Mental Health Review Journal*. 2017.
18. Ring D, Lawn S. Stigma perpetuation at the interface of mental health care: a review to compare patient and clinician perspectives of stigma and borderline personality disorder. *Journal of Mental Health*. 2019:1-21.
19. Sheridan Rains L, Echave A, Rees J, Scott HR, Lever Taylor B, Broeckelmann E, et al. Service user experiences of community services for complex emotional needs: A qualitative thematic synthesis. *PLoS One*. 2021;16(4):e0248316.

20. Werbeloff N, Hilge Thygesen J, Hayes JF, Viding EM, Johnson S, Osborn DP. Childhood sexual abuse in patients with severe mental illness: Demographic, clinical and functional correlates. *Acta Psychiatrica Scandinavica*. 2021;143(6):495-502.
21. Coughlan H, Cannon M. Does childhood trauma play a role in the aetiology of psychosis? A review of recent evidence. *BJPsych Advances*. 2017;23(5):307-15.
22. Rafiq S, Campodonico C, Varese F. The relationship between childhood adversities and dissociation in severe mental illness: A meta - analytic review. *Acta Psychiatrica Scandinavica*. 2018;138(6):509-25.
23. Matheson S, Shepherd AM, Pinchbeck R, Laurens K, Carr VJ. Childhood adversity in schizophrenia: a systematic meta-analysis. *Psychological medicine*. 2013;43(2):225-38.
24. Spandler H, McKeown M. Exploring the case for truth and reconciliation in mental health services. *Mental Health Review Journal*. 2017.
25. Rössler W. Stress, burnout, and job dissatisfaction in mental health workers. *European archives of psychiatry and clinical neuroscience*. 2012;262(2):65-9.
26. Johnson S, Dalton - Locke C, Baker J, Hanlon C, Salisbury TT, Fossey M, et al. Acute psychiatric care: approaches to increasing the range of services and improving access and quality of care. *World Psychiatry*. 2022;21(2):220-36.
27. Akther SF, Molyneaux E, Stuart R, Johnson S, Simpson A, Oram S. Patients' experiences of assessment and detention under mental health legislation: systematic review and qualitative meta-synthesis. *BJPsych Open*. 2019;5(3).
28. Prytherch H, Cooke A, Marsh I. Coercion or collaboration: service-user experiences of risk management in hospital and a trauma-informed crisis house. *Psychosis*. 2021;13(2):93-104.
29. Cohen LJ. Psychiatric hospitalization as an experience of trauma. *Archives of Psychiatric Nursing*. 1994;8(2):78-81.
30. Elliott DE, Bjelajac P, Fallot RD, Markoff LS, Reed BG. Trauma - informed or trauma - denied: Principles and implementation of trauma - informed services for women. *Journal of community psychology*. 2005;33(4):461-77.
31. Sweeney A, Filson B, Kennedy A, Collinson L, Gillard S. A paradigm shift: relationships in trauma-informed mental health services. *BJPsych advances*. 2018;24(5):319-33.
32. Tricco AC, Lillie E, Zarin W, O'Brien KK, Colquhoun H, Levac D, et al. PRISMA extension for scoping reviews (PRISMA-ScR): checklist and explanation. *Annals of internal medicine*. 2018;169(7):467-73.
33. Arksey H, O'Malley L. Scoping studies: towards a methodological framework. *International journal of social research methodology*. 2005;8(1):19-32.
34. Miller NA, Najavits LM. Creating trauma-informed correctional care: A balance of goals and environment. *European journal of psychotraumatology*. 2012;3(1):17246.
35. Lloyd-Evans B, Slade M, Jagielska D, Johnson S. Residential alternatives to acute psychiatric hospital admission: systematic review. *The British Journal of Psychiatry*. 2009;195(2):109-17.
36. Niccols A, Milligan K, Sword W, Thabane L, Henderson J, Smith A. Integrated programs for mothers with substance abuse issues: A systematic review of studies reporting on parenting outcomes. *Harm reduction journal*. 2012;9(1):1-11.
37. Carpenter RA, Falkenburg J, White TP, Tracy DK. Crisis teams: systematic review of their effectiveness in practice. *The Psychiatrist*. 2013;37(7):232-7.
38. Iozzino L, Ferrari C, Large M, Niessen O, De Girolamo G. Prevalence and risk factors of violence by psychiatric acute inpatients: a systematic review and meta-analysis. *PLoS one*. 2015;10(6):e0128536.
39. de Andrade D, Elphinston RA, Quinn C, Allan J, Hides L. The effectiveness of residential treatment services for individuals with substance use disorders: A systematic review. *Drug and alcohol dependence*. 2019;201:227-35.



40. Staniszewska S, Mockford C, Chadburn G, Fenton S-J, Bhui K, Larkin M, et al. Experiences of inpatient mental health services: systematic review. *The British Journal of Psychiatry*. 2019;214(6):329-38.
41. Stewart NA, Wilkinson-Tough M, Chambers GN. Psychological interventions for individuals with a diagnosis of borderline personality disorder in forensic settings: A systematic review. *The Journal of Forensic Psychiatry & Psychology*. 2019;30(5):744-93.
42. Alford M, O'Rourke S, Doyle P, Todd L. Examining the factors associated with impulsivity in forensic populations: A systematic review. *Aggression and violent behavior*. 2020;54:101409.
43. Alsuhaibani R, Smith DC, Lowrie R, Aljhani S, Paudyal V. Scope, quality and inclusivity of international clinical guidelines on mental health and substance abuse in relation to dual diagnosis, social and community outcomes: a systematic review. *BMC psychiatry*. 2021;21(1):1-23.
44. Malik N, Facer-Irwin E, Dickson H, Bird A, MacManus D. The effectiveness of trauma-focused interventions in prison settings: a systematic review and meta-analysis. *Trauma, Violence, & Abuse*. 2021:15248380211043890.
45. Covidence. Covidence systematic review software. 2017.
46. Aremu B, Hill PD, McNeal JM, Petersen MA, Swanberg D, Delaney KR. Implementation of trauma-informed care and brief solution-focused therapy: a quality improvement project aimed at increasing engagement on an inpatient psychiatric unit. *Journal of Psychosocial Nursing and Mental Health Services*. 2018;56(8):16-22.
47. Azeem MW, Aujla A, Rammerth M, Binsfeld G, Jones RB. Effectiveness of six core strategies based on trauma informed care in reducing seclusions and restraints at a child and adolescent psychiatric hospital. *Journal of Child and Adolescent Psychiatric Nursing*. 2011;24(1):11-5.
48. Azeem MW, Reddy B, Wudarsky M, Carabetta L, Gregory F, Sarofin M. Restraint reduction at a pediatric psychiatric hospital: A ten - year journey. *Journal of Child and Adolescent Psychiatric Nursing*. 2015;28(4):180-4.
49. Beckett P, Holmes D, Phipps M, Patton D, Molloy L. Trauma-informed care and practice: Practice improvement strategies in an inpatient mental health ward. *Journal of psychosocial nursing and mental health services*. 2017;55(10):34-8.
50. Blair EW, Woolley S, Szarek BL, Mucha TF, Dutka O, Schwartz HI, et al. Reduction of seclusion and restraint in an inpatient psychiatric setting: a pilot study. *Psychiatric Quarterly*. 2017;88(1):1-7.
51. Boel-Studt S. A Quasi-Experimental Study of Trauma-Informed Psychiatric Residential Treatment for Children and Adolescents. *Research on Social Work Practice*. 2015;27.
52. Borckardt JJ, Madan A, Grubaugh AL, Danielson CK, Pelic CG, Hardesty SJ, et al. Systematic investigation of initiatives to reduce seclusion and restraint in a state psychiatric hospital. *Psychiatric Services*. 2011;62(5):477-83.
53. Brown AD, McCauley K, Navalta CP, Saxe GN. Trauma systems therapy in residential settings: Improving emotion regulation and the social environment of traumatized children and youth in congregate care. *Journal of family violence*. 2013;28(7):693-703.
54. Cadiz S, Savage A, Bonavota D, Hollywood J, Butters E, Neary M, et al. The portal project: A layered approach to integrating trauma into alcohol and other drug treatment for women. *Alcoholism Treatment Quarterly*. 2005;22(3-4):121-39.
55. Chandler G. From Traditional Inpatient to Trauma-Informed Treatment: Transferring Control From Staff to Patient. *Journal of the American Psychiatric Nurses Association*. 2008;14:363-71.
56. Chandler G. Reducing Use of Restraints and Seclusion to Create a Culture of Safety. *Journal of Psychosocial Nursing and Mental Health Services*. 2012;50:29-36.
57. Duxbury J, Baker J, Downe S, Jones F, Greenwood P, Thygesen H, et al. Minimising the use of physical restraint in acute mental health services: The outcome of a restraint reduction programme ('REsTRAIN YOURSELF'). *International Journal of Nursing Studies*. 2019;95:40-8.
58. Farragher B, Yanosy S. Creating a trauma-sensitive culture in residential treatment. *Therapeutic Communities*. 2005;26(1):97-113.

59. Forrest S, Gervais R, Lord KA, Sposato A, Martin L, Beserra K, et al. Building communities of care: A comprehensive model for trauma-informed youth capacity building and behavior management in residential services. *Residential Treatment for Children & Youth*. 2018;35(4):265-85.
60. Goetz SB, Taylor-Trujillo A. A change in culture: violence prevention in an acute behavioral health setting. *Journal of the American Psychiatric Nurses Association*. 2012;18(2):96-103.
61. Gonshak AB. Analysis of trauma symptomology, trauma-informed care, and student-teacher relationships in a residential treatment center for female adolescents. *Electronic Theses and Dissertations: University of Louisville*; 2011.
62. Hale R. Implementation of a Trauma-Informed Care Program for the Reduction of Crisis Interventions: Walden University; 2019.
63. Hale R, Wendler MC. Evidence-based practice: Implementing trauma-informed care of children and adolescents in the inpatient psychiatric setting. *Journal of the American Psychiatric Nurses Association*. 2020:1078390320980045.
64. Isobel S, Edwards C. Using trauma informed care as a nursing model of care in an acute inpatient mental health unit: A practice development process: TRAUMA INFORMED MODEL OF CARE. *International Journal of Mental Health Nursing*. 2016;26.
65. Jacobowitz W, Moran C, Best C, Mensah L. Post-traumatic stress, trauma-informed care, and compassion fatigue in psychiatric hospital staff: A correlational study. *Issues in mental health nursing*. 2015;36(11):890-9.
66. Jones J. How distress is understood and communicated by women patients detained in high secure forensic healthcare, and how nurses interpret that distress: An exploration using a Multi-perspective Interpretative Phenomenological Analysis: University of Derby (United Kingdom); 2021.
67. Korchmaros JD, Greene A, Murphy S. Implementing Trauma-Informed Research-Supported Treatment: Fidelity, Feasibility, and Acceptability. *Child and Adolescent Social Work Journal*. 2021;38(1):101-13.
68. Kramer MG. Sanctuary in a residential treatment center: creating a therapeutic community of hope countering violence. *Therapeutic communities: The International Journal of therapeutic communities*. 2016.
69. Niimura J, Nakanishi M, Okumura Y, Kawano M, Nishida A. Effectiveness of 1 - day trauma - informed care training programme on attitudes in psychiatric hospitals: A pre–post study. *International journal of mental health nursing*. 2019;28(4):980-8.
70. Prchal KM. Implementing a new treatment philosophy in a residential treatment center for children with severe emotional disturbances: A qualitative study: Columbia University; 2005.
71. Rivard JC, McCorkle D, Duncan ME, Pasquale LE, Bloom SL, Abramovitz R. Implementing a trauma recovery framework for youths in residential treatment. *Child and Adolescent Social Work Journal*. 2004;21(5):529-50.
72. Rivard J, Bloom S, McCorkle D, Abramovitz R. Preliminary results of a study examining the implementation and effects of a trauma recovery framework for youths in residential treatment. *Therapeutic Community: The International Journal for Therapeutic and Supportive Organizations*. 2005;26.
73. Stamatopoulou V. Transitioning to a trauma informed forensic unit: staff perceptions of a shift in organisational culture. 2019.
74. Tompkins CNE, Neale J. Delivering trauma-informed treatment in a women-only residential rehabilitation service: Qualitative study. *Drugs: Education, Prevention and Policy*. 2018;25(1):47-55.
75. Zweben JE, Moses Y, Cohen JB, Price G, Chapman W, Lamb J. Enhancing family protective factors in residential treatment for substance use disorders. *Child Welfare*. 2015;94(5):145-66.
76. American Psychiatric Association. *Diagnostic and statistical manual of mental disorders (DSM-5®)*: American Psychiatric Pub; 2013.
77. Association AP. *Diagnostic and statistical manual of mental disorders (4th ed., text rev.)*. Washington, DC2000.



78. Black PJ, Woodworth M, Tremblay M, Carpenter T. A review of trauma-informed treatment for adolescents. *Canadian Psychology/Psychologie Canadienne*. 2012;53(3):192.
79. Cook A, Blaustein M, Spinazzola J, van der Kolk B. Complex trauma in children and adolescents: White paper from the national child traumatic stress network complex trauma task force. Los Angeles: National Center for Child Traumatic Stress. 2003;35(5):390-8.
80. van der Kolk B. Posttraumatic stress disorder and the nature of trauma. Solomon MFaS, D.J. (Eds), editor. New York, NY2003.
81. Scheidlinger S. Group interventions for treatment of psychological trauma. New York. 2004:64.
82. Ryle A, Poynton AM, Brockman BJ. Cognitive-analytic therapy: Active participation in change: A new integration in brief psychotherapy: John Wiley & Sons; 1990.
83. Huckshorn KA, CAP I, Director N. Six core strategies to reduce the use of seclusion and restraint planning tool. Washington, DC: National Association of State Mental Health Program Directors. 2005.
84. Bloom SL. Creating sanctuary: Toward the evolution of sane societies: Routledge; 2013.
85. Wilder SS, Sorensen C. Essentials of aggression management in health care: Pearson; 2001.
86. Harris ME, Fallot RD. Using trauma theory to design service systems: Jossey-Bass/Wiley; 2001.
87. Almvik R, Woods P. The Brøset Violence Checklist (BVC) and the prediction of inpatient violence: some preliminary results. *Psychiatric Care*. 1998;5:208-13.
88. Almvik R, Woods P, Rasmussen K. The Brøset Violence Checklist: sensitivity, specificity, and interrater reliability. *Journal of interpersonal violence*. 2000;15(12):1284-96.
89. Woods P, Almvik R. The Brøset violence checklist (BVC). *Acta Psychiatrica Scandinavica*. 2002;106:103-5.
90. Saakvitne KW, Gamble S, Pearlman LA, Lev BT. Risking connection: A training curriculum for working with survivors of childhood abuse. 2000.
91. Tarzia L, Bohren MA, Cameron J, Garcia-Moreno C, O'Doherty L, Fiolet R, et al. Women's experiences and expectations after disclosure of intimate partner abuse to a healthcare provider: A qualitative meta-synthesis. *BMJ open*. 2020;10(11):e041339.
92. Flood C, Bowers L, Parkin D. Estimating the costs of conflict and containment on adult acute inpatient psychiatric wards. *Nursing economics*. 2008;26(5):325-32.
93. Sabes-Figuera R, McCrone P, Csipke E, Craig TK, Rose D, Sharma B, et al. Predicting psychiatric inpatient costs. *Social psychiatry and psychiatric epidemiology*. 2016;51(2):303-8.
94. DeLeo K, Maconick L, McCabe R, Broeckelmann E, Rains LS, Rowe S, et al. Experiences of crisis care among service users with complex emotional needs or a diagnosis of 'personality disorder', and other stakeholders: systematic review and meta-synthesis of the qualitative literature. *BJPsych Open*. 2022;8(2).
95. Langley LP, Eleanor. Death By A Thousand Cuts: Report into the Tees, Esk and Wear Valleys NHS Foundation Trust "BPD+" Protocol. 2022.
96. Muskett C. Trauma - informed care in inpatient mental health settings: A review of the literature. *International journal of mental health nursing*. 2014;23(1):51-9.
97. Bryson SA, Gauvin E, Jamieson A, Rathgeber M, Faulkner-Gibson L, Bell S, et al. What are effective strategies for implementing trauma-informed care in youth inpatient psychiatric and residential treatment settings? A realist systematic review. *International journal of mental health systems*. 2017;11(1):1-16.
98. Wilson A, Hutchinson M, Hurley J. Literature review of trauma - informed care: Implications for mental health nurses working in acute inpatient settings in Australia. *International Journal of Mental Health Nursing*. 2017;26(4):326-43.
99. Goddard A, Jones RW, Esposito D, Janicek E. Trauma informed education in nursing: A call for action. Elsevier; 2021. p. 104880.
100. Rothwell C, Kehoe A, Farook S, Illing J. The characteristics of effective clinical and peer supervision in the workplace: a rapid evidence review. Newcastle: Newcastle University. 2019.

101. Woltmann EM, Whitley R, McHugo GJ, Brunette M, Torrey WC, Coots L, et al. The role of staff turnover in the implementation of evidence-based practices in mental health care. *Psychiatric Services*. 2008;59(7):732-7.
102. Bowers L. Safewards: a new model of conflict and containment on psychiatric wards. *Journal of psychiatric and mental health nursing*. 2014;21(6):499-508.
